# Supplementary material for: Synthesis of Mono- and Polyazole Hybrids Based on Polyfluoroflavones
Source: MDPI journal article supplement (doi:10.3390/molecules28020869), 2023-01-15

Figure S1.  $^1\text{H}$  NMR spectrum of compound 4

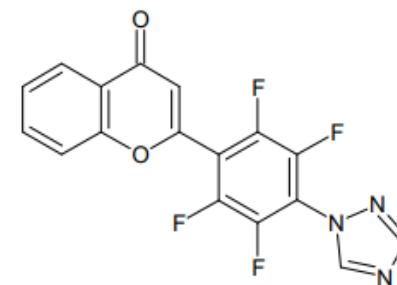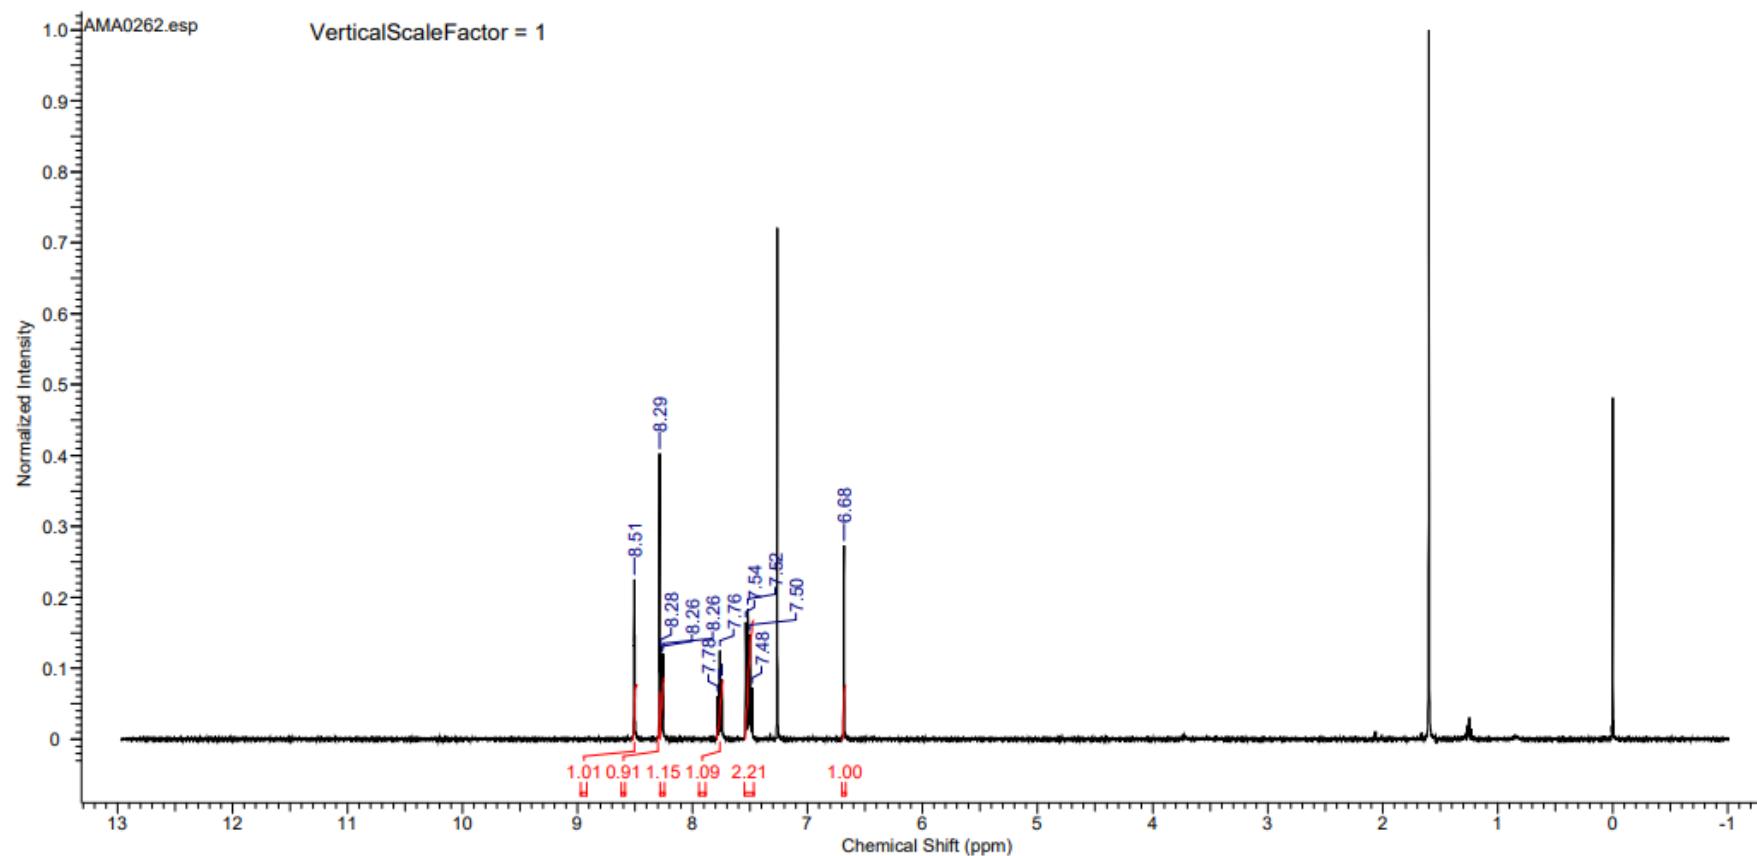

Figure S2.  $^{13}\text{C}$  NMR spectrum of compound 4

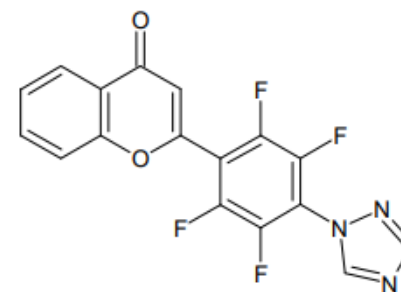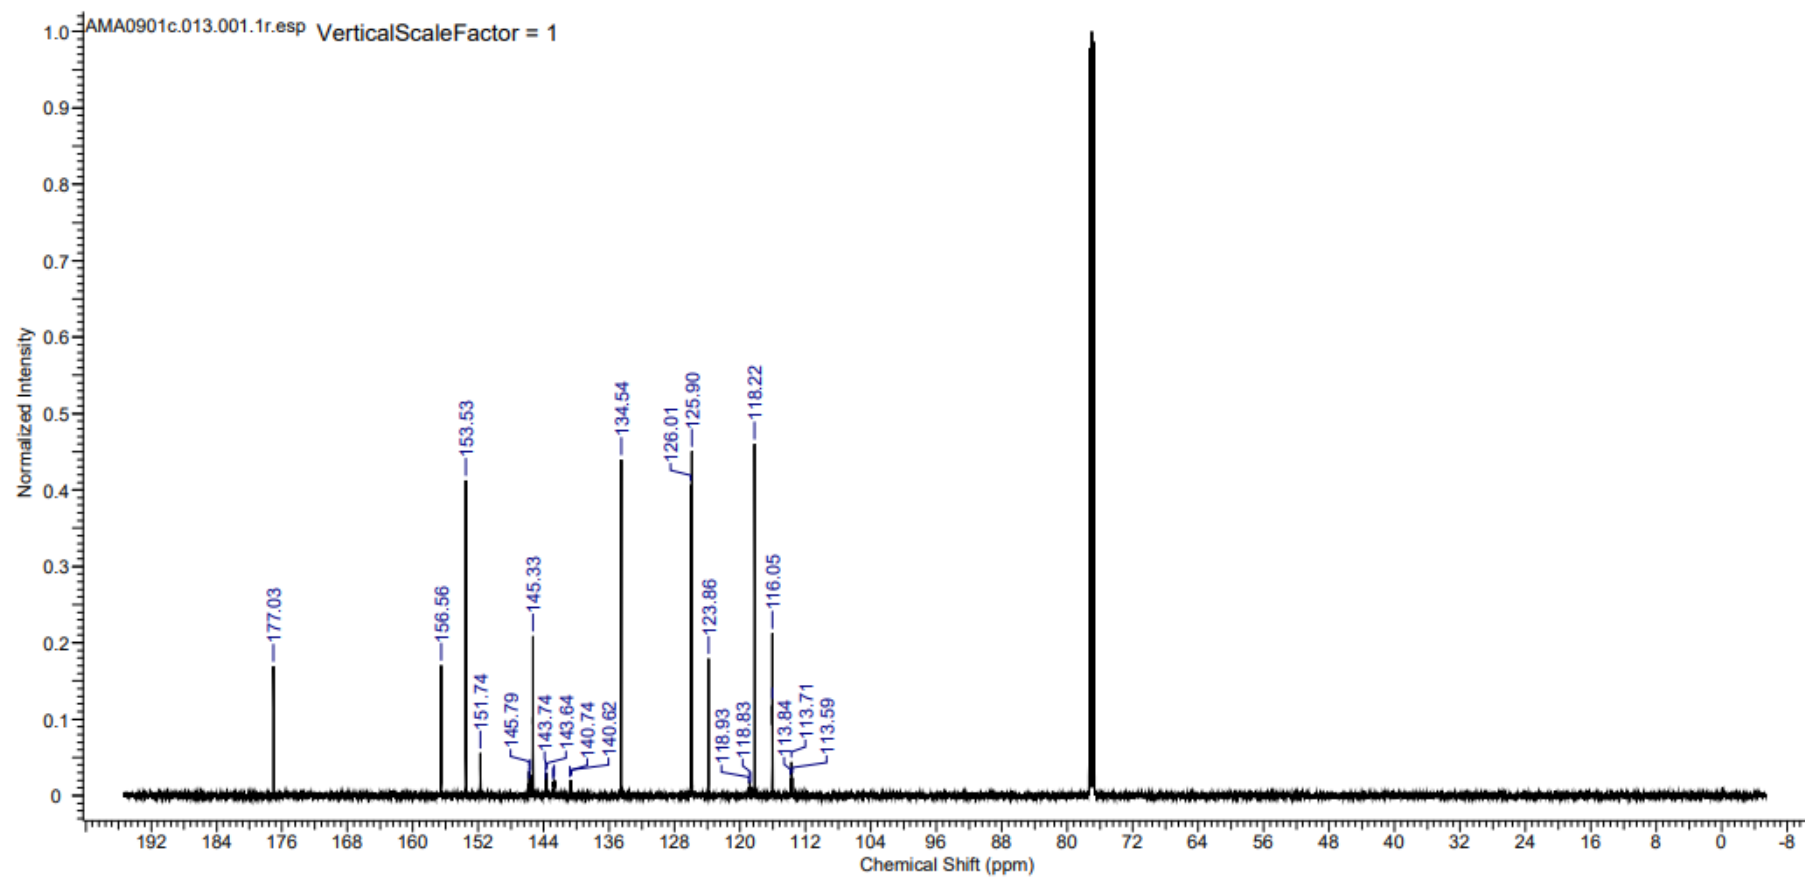

Figure S3.  $^{19}\text{F}$  NMR spectrum of compound 4

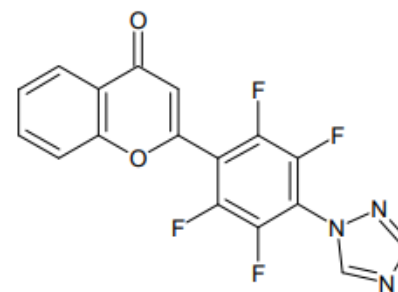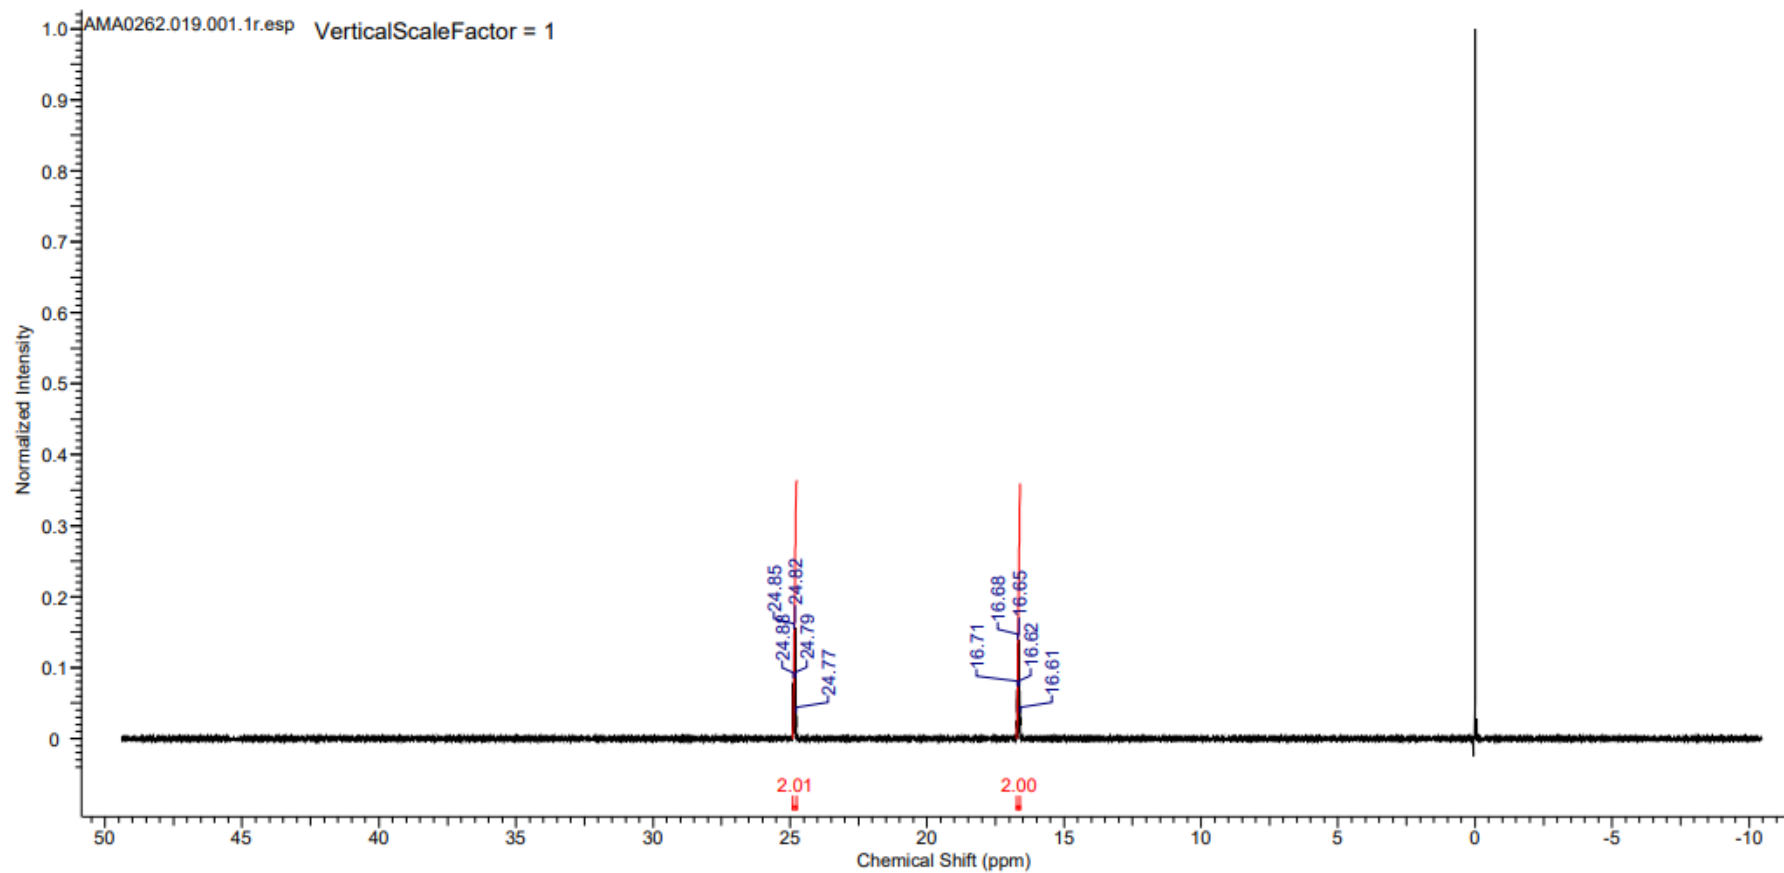

Figure S4.  $^1\text{H}$  NMR spectrum of compound 7

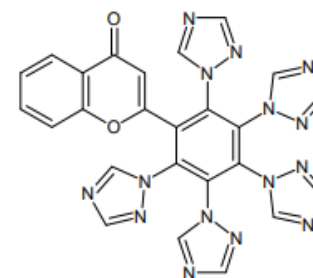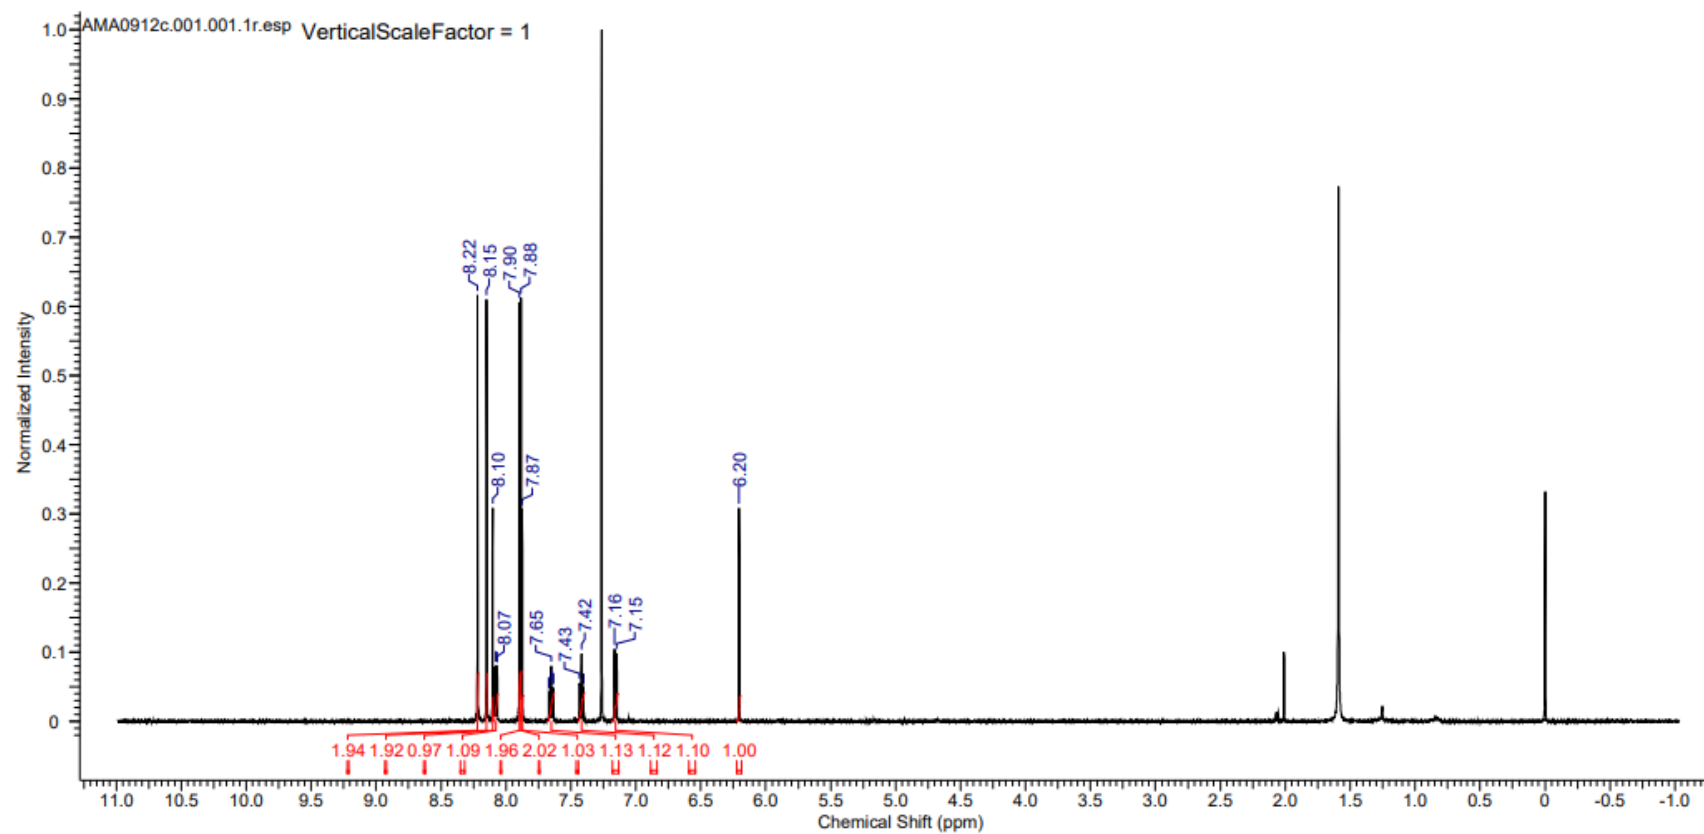

Figure S5.  $^{13}\text{C}$  NMR spectrum of compound 7

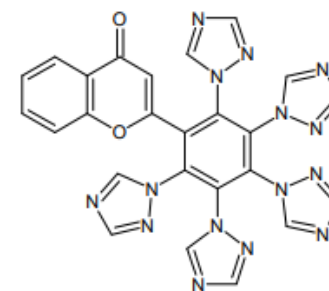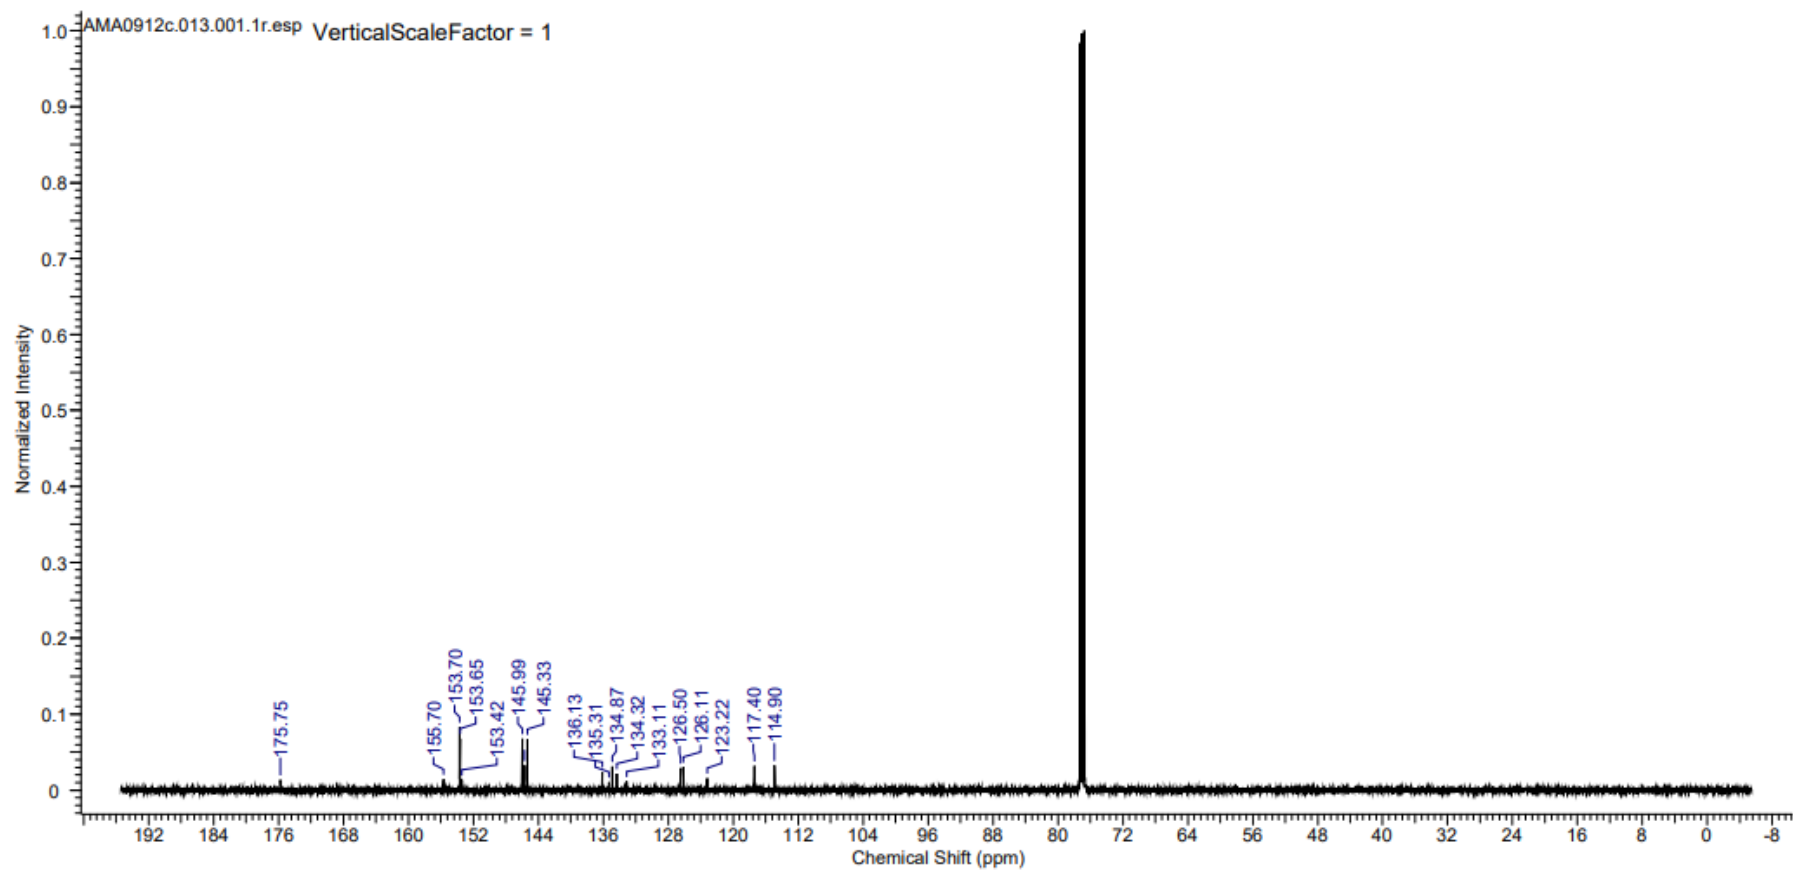

Figure S6.  $^1\text{H}$  NMR spectrum of compound 8

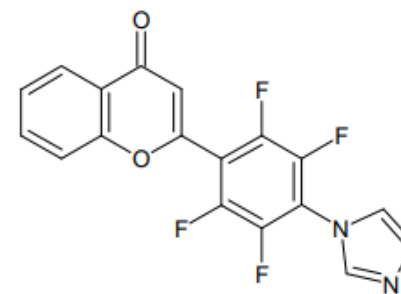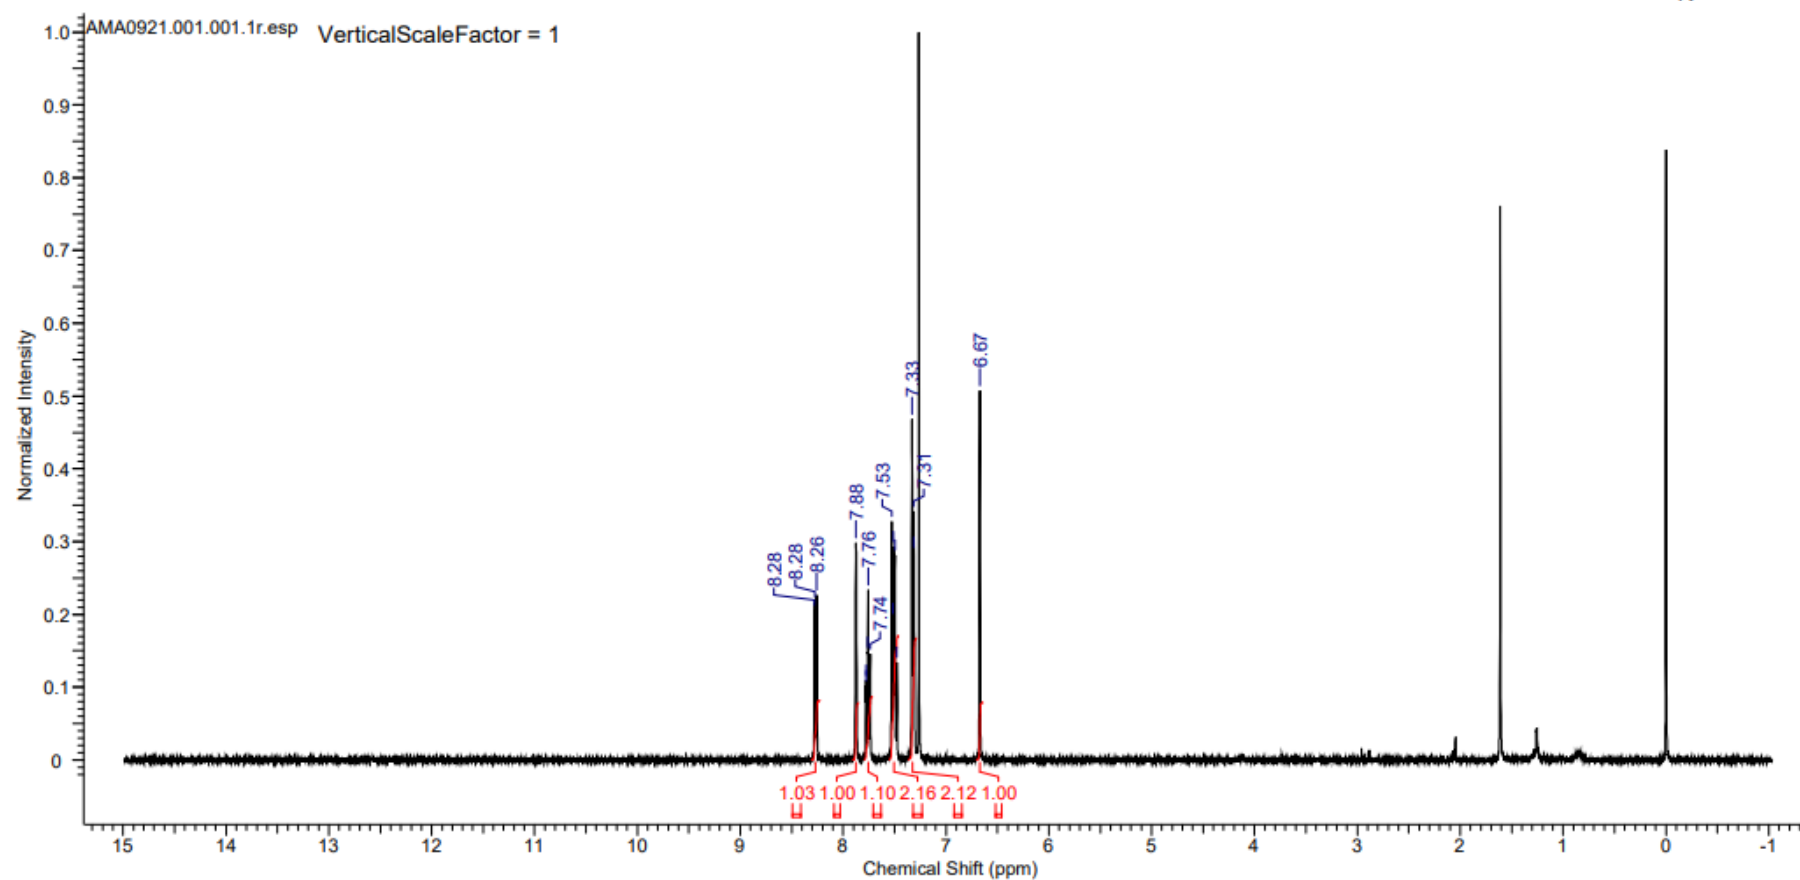

Figure S7.  $^{13}\text{C}$  NMR spectrum of compound 8

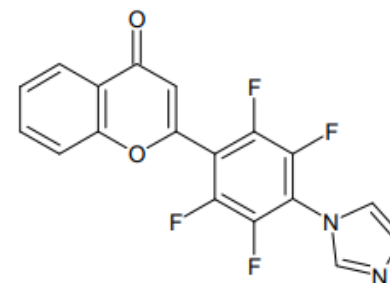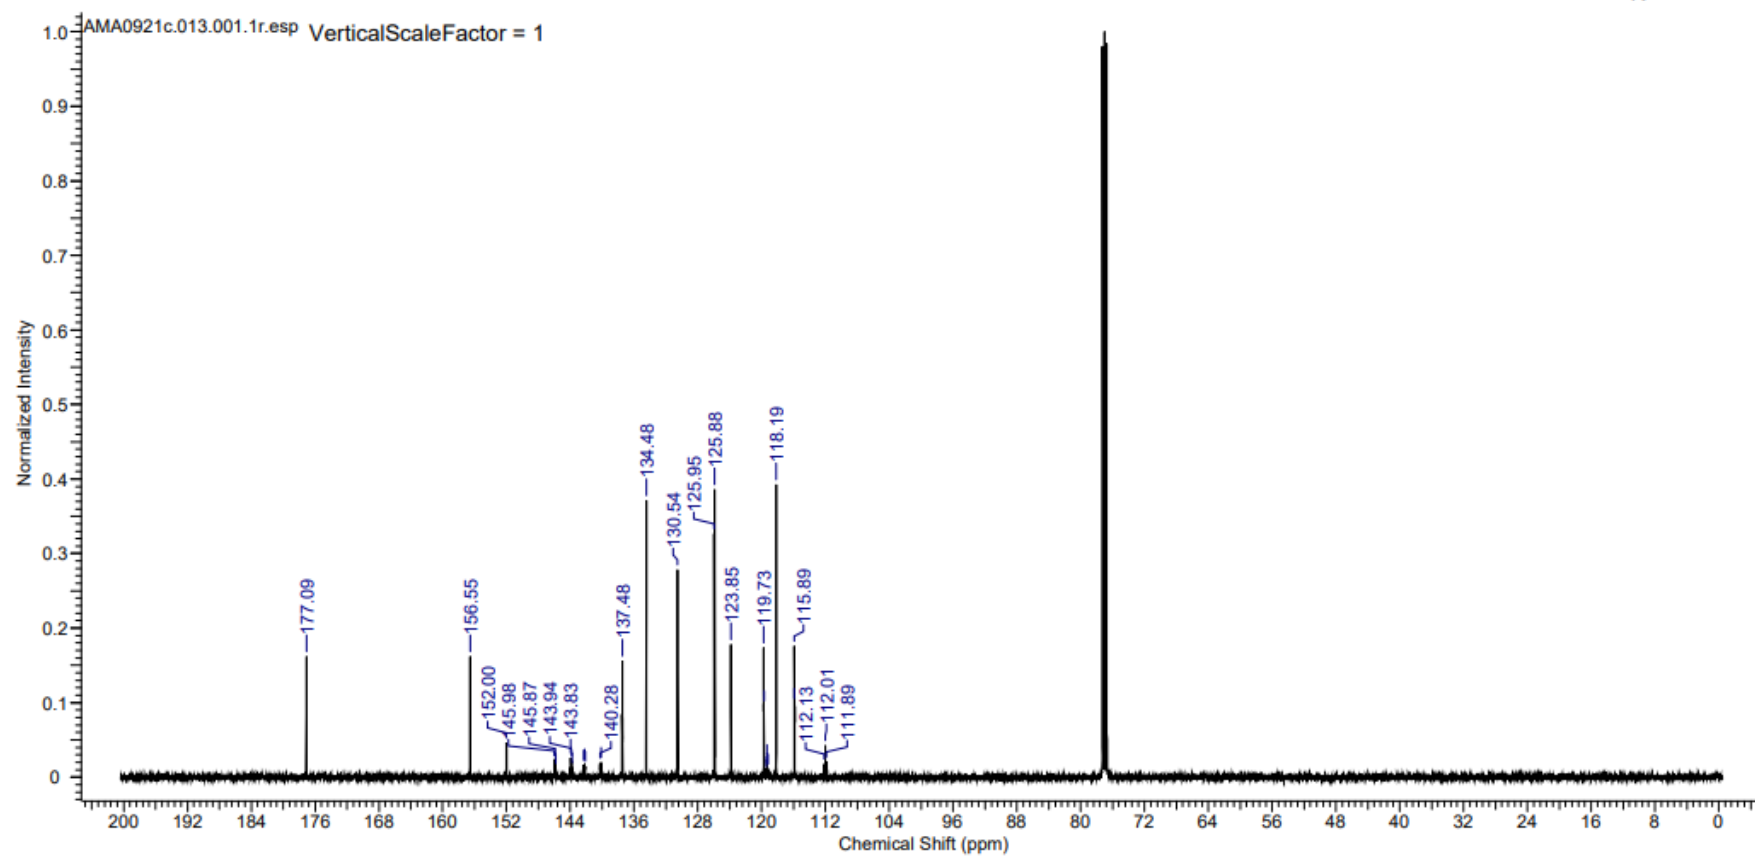

Figure S8.  $^{19}\text{F}$  NMR spectrum of compound 8

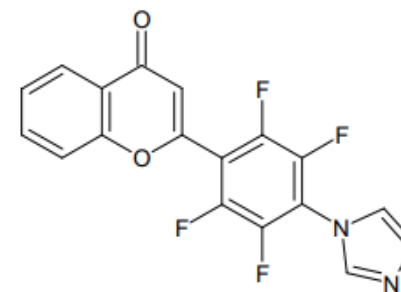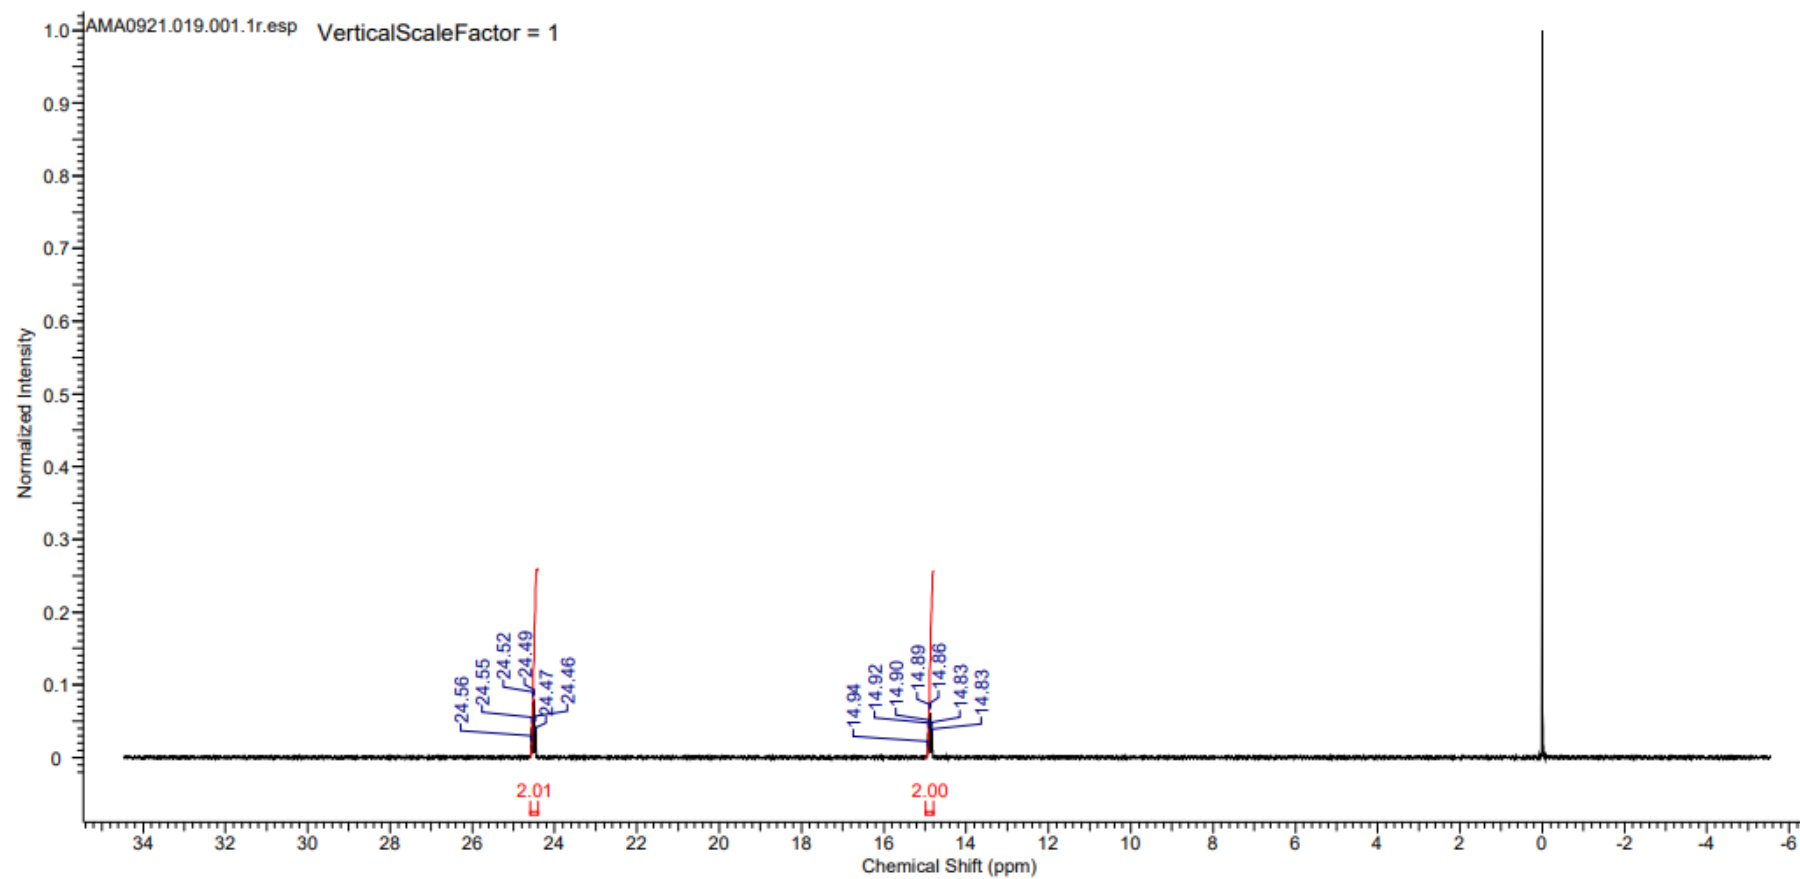



Figure S9.  $^1\text{H}$  NMR spectrum of compound 9

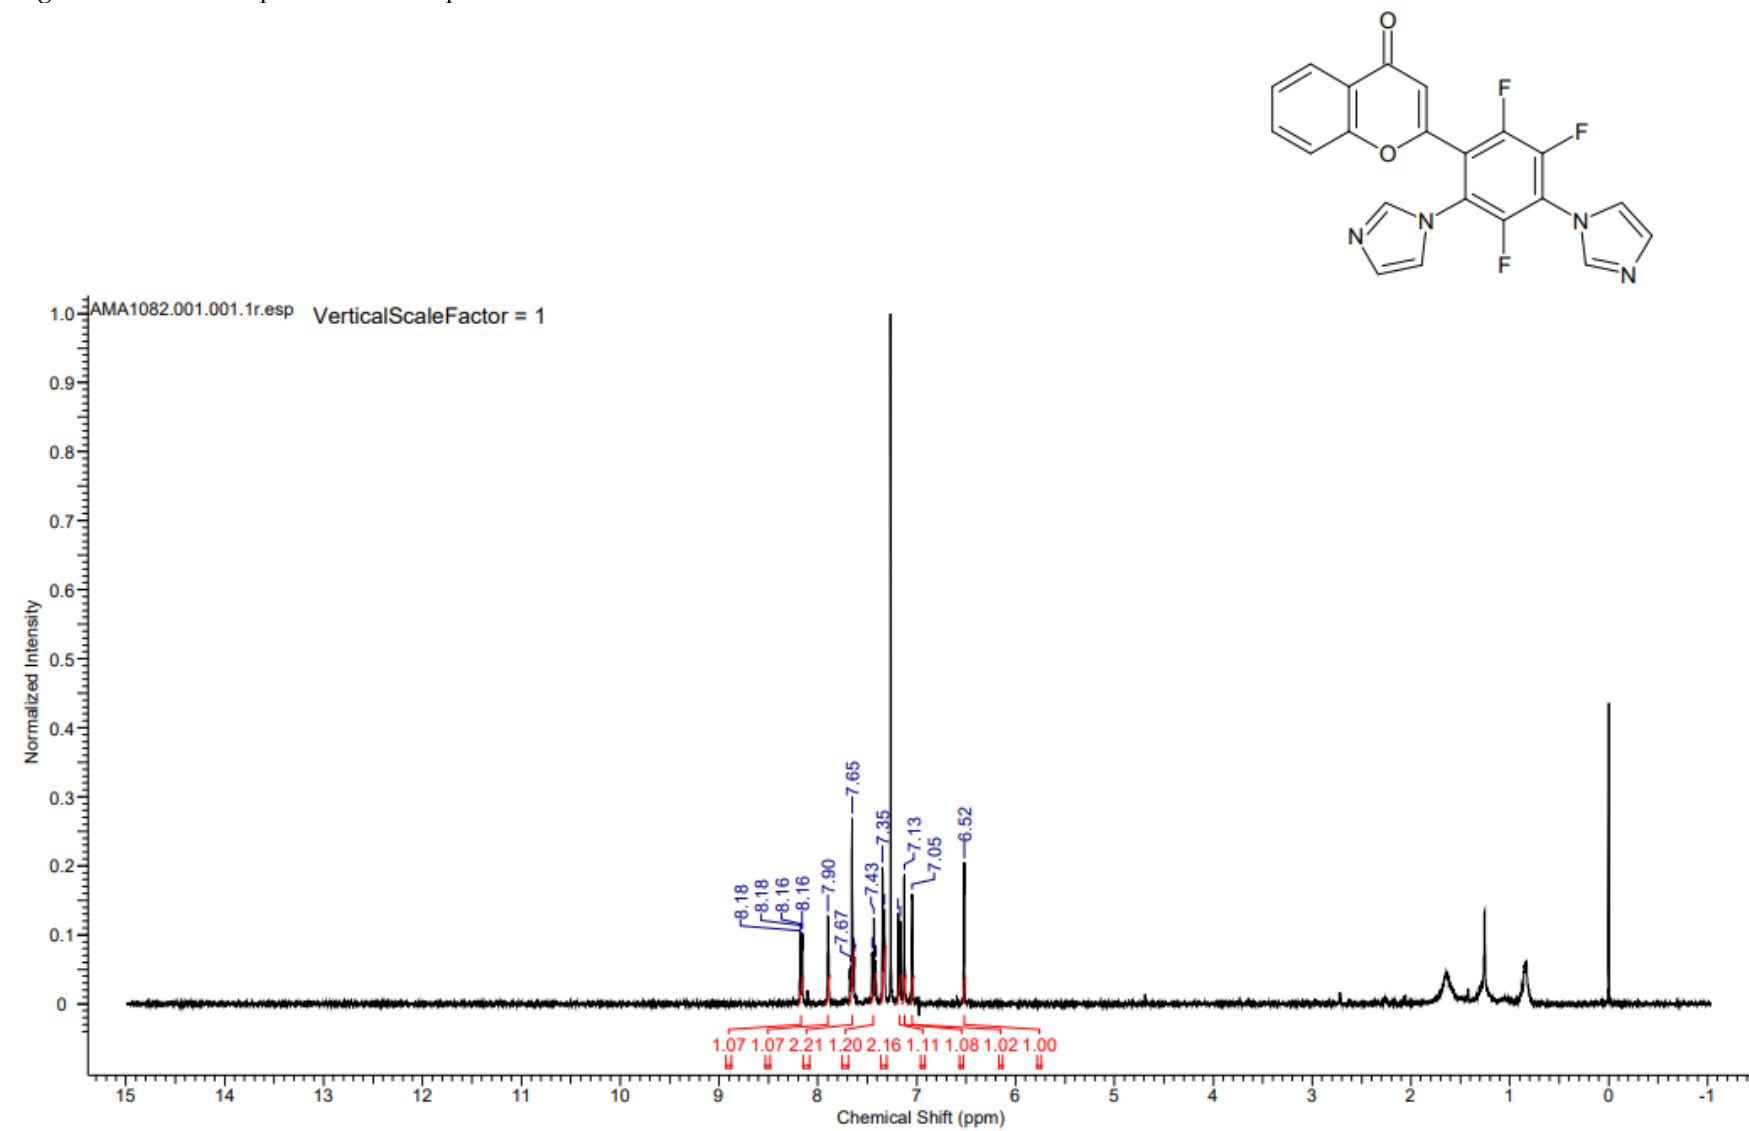

Figure S10.  $^{19}\text{F}$  NMR spectrum of compound 9

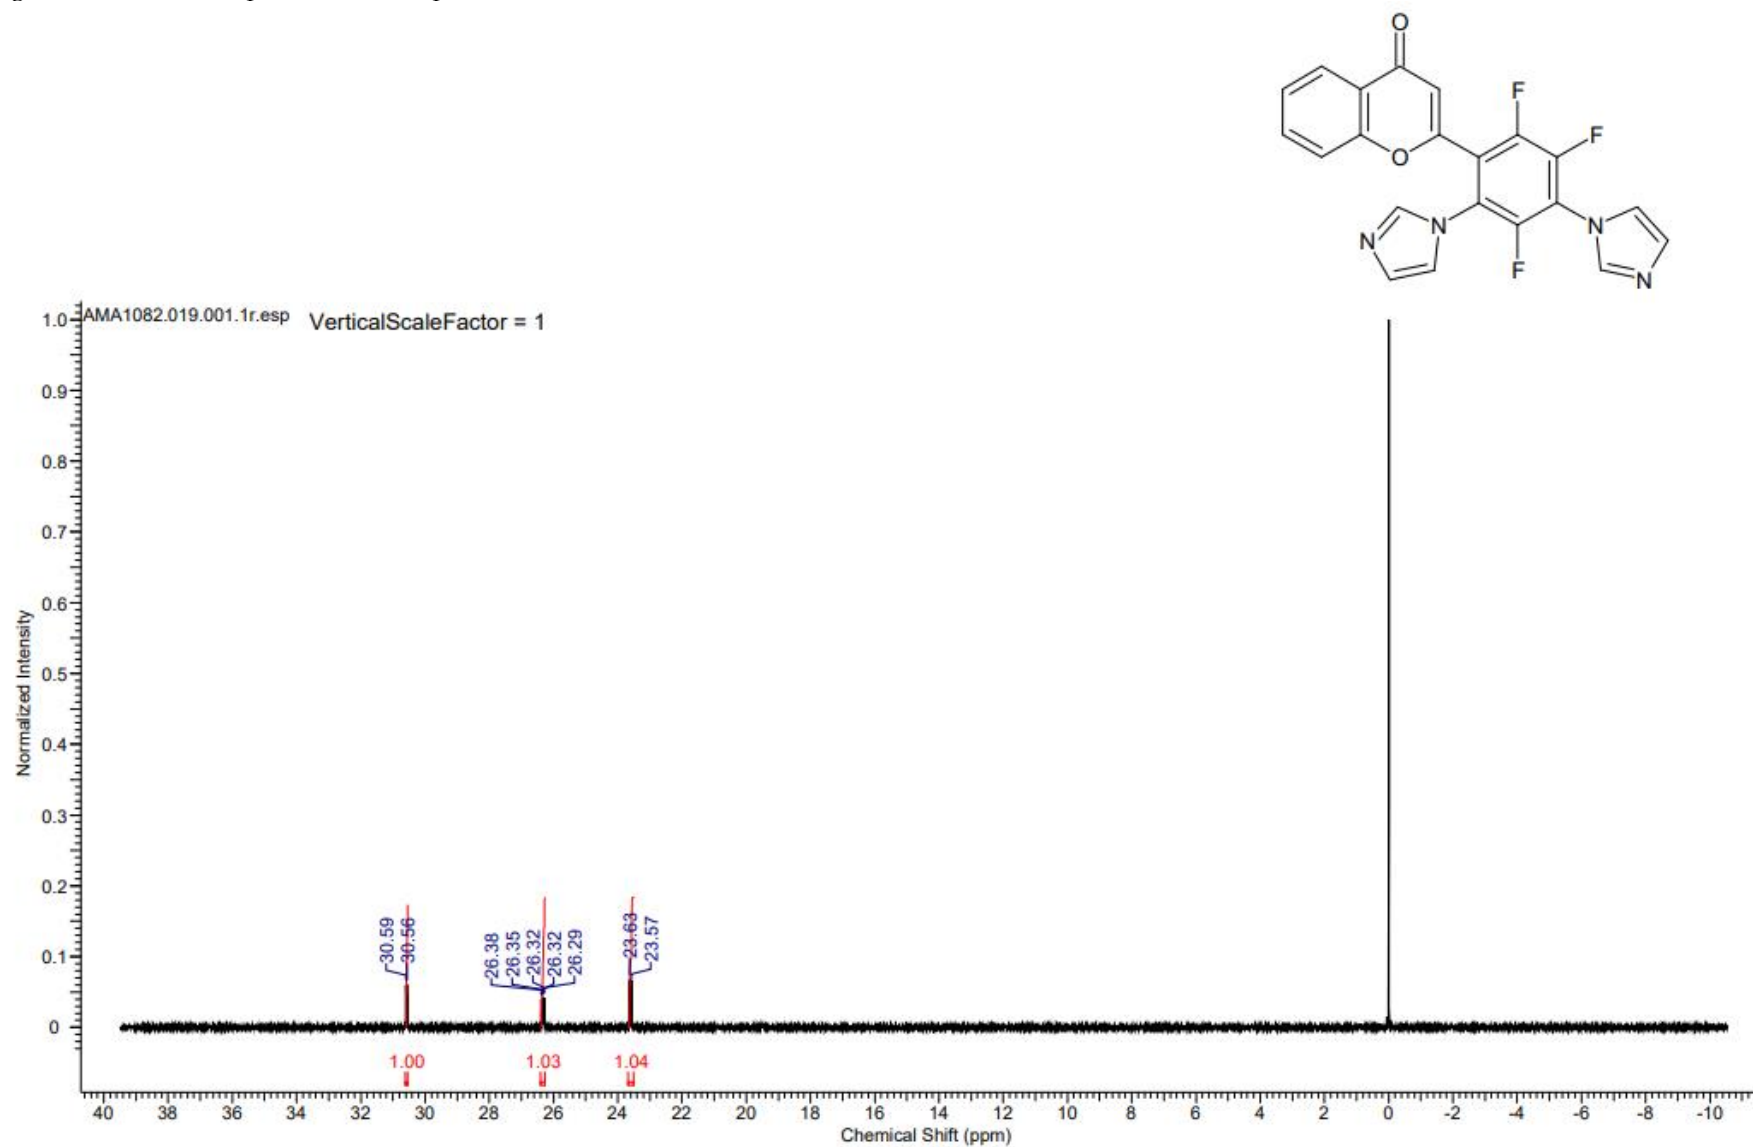

Figure S11. <sup>1</sup>H NMR spectrum of compound 10

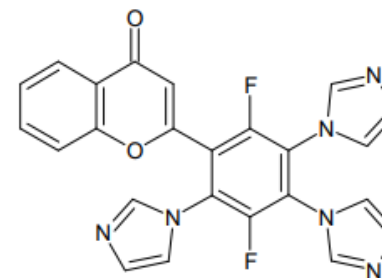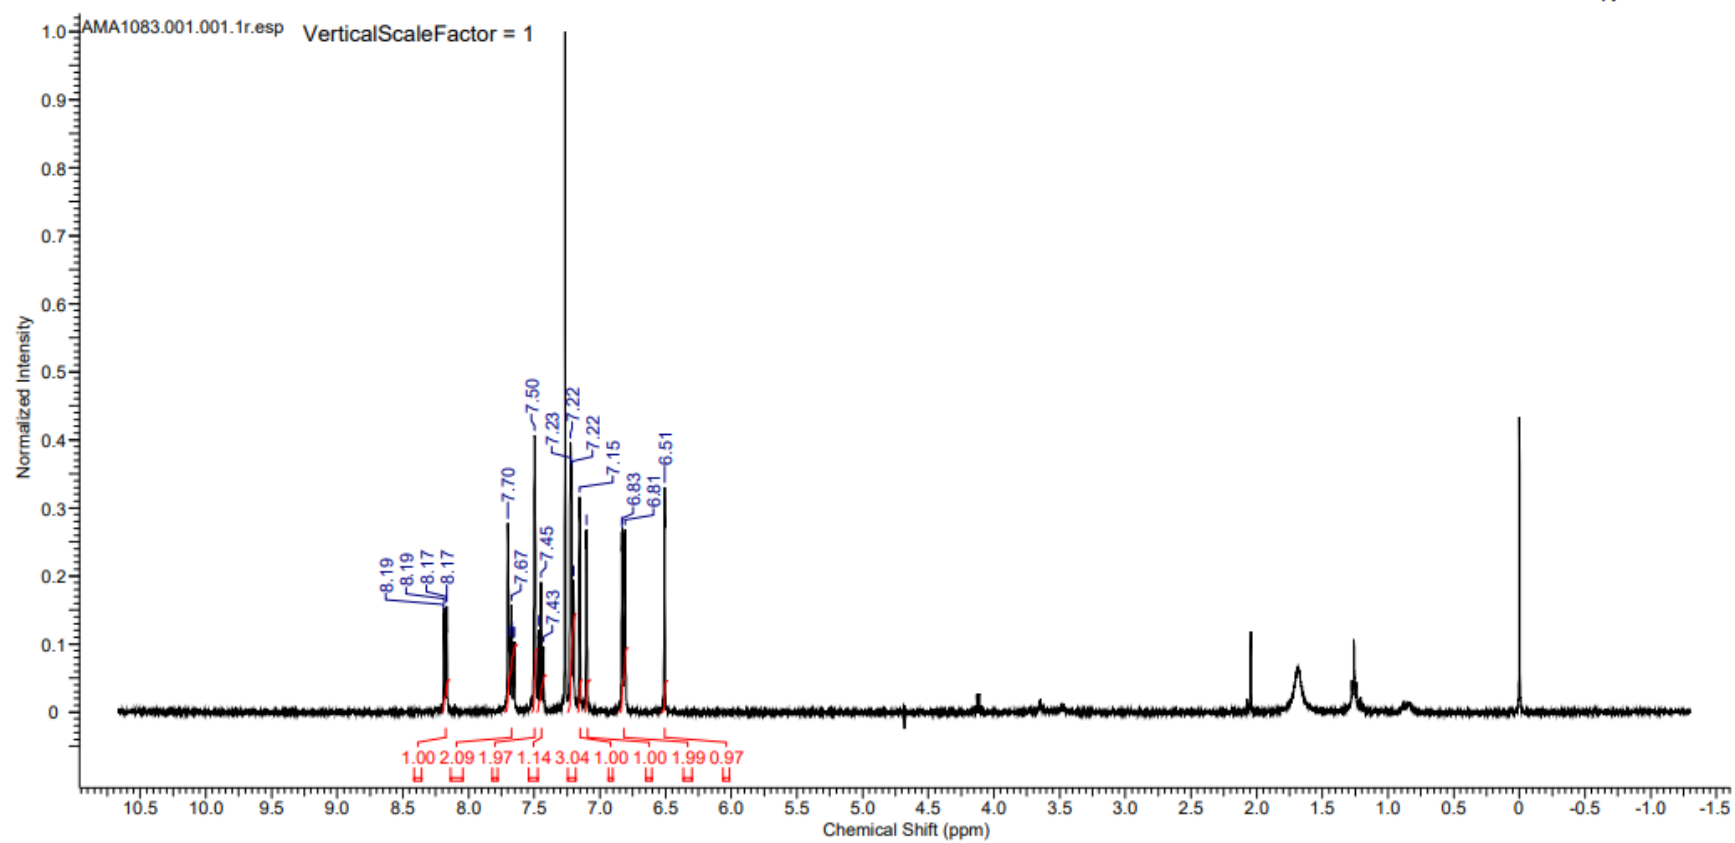

Figure S12.  $^{13}\text{C}$  NMR spectrum of compound 10

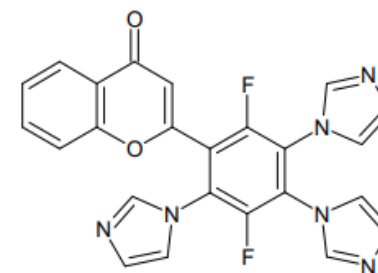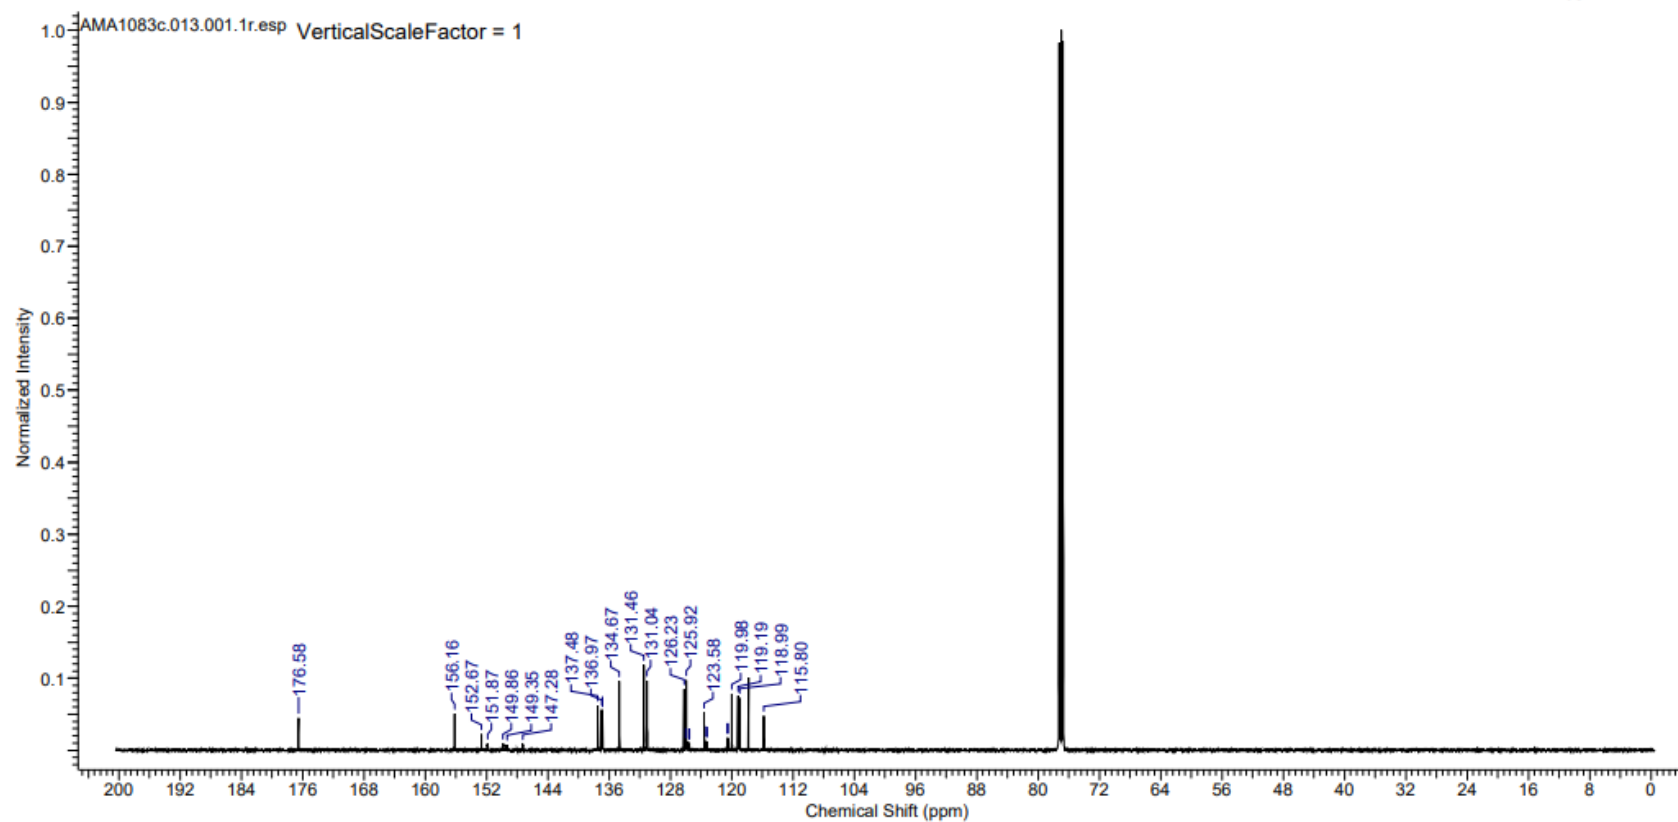

Figure S13.  $^{19}\text{F}$  NMR spectrum of compound **10**

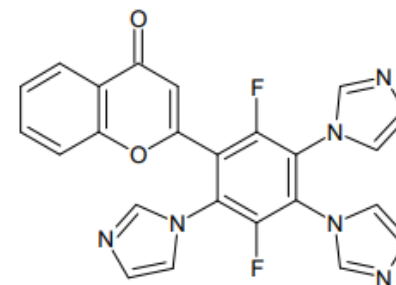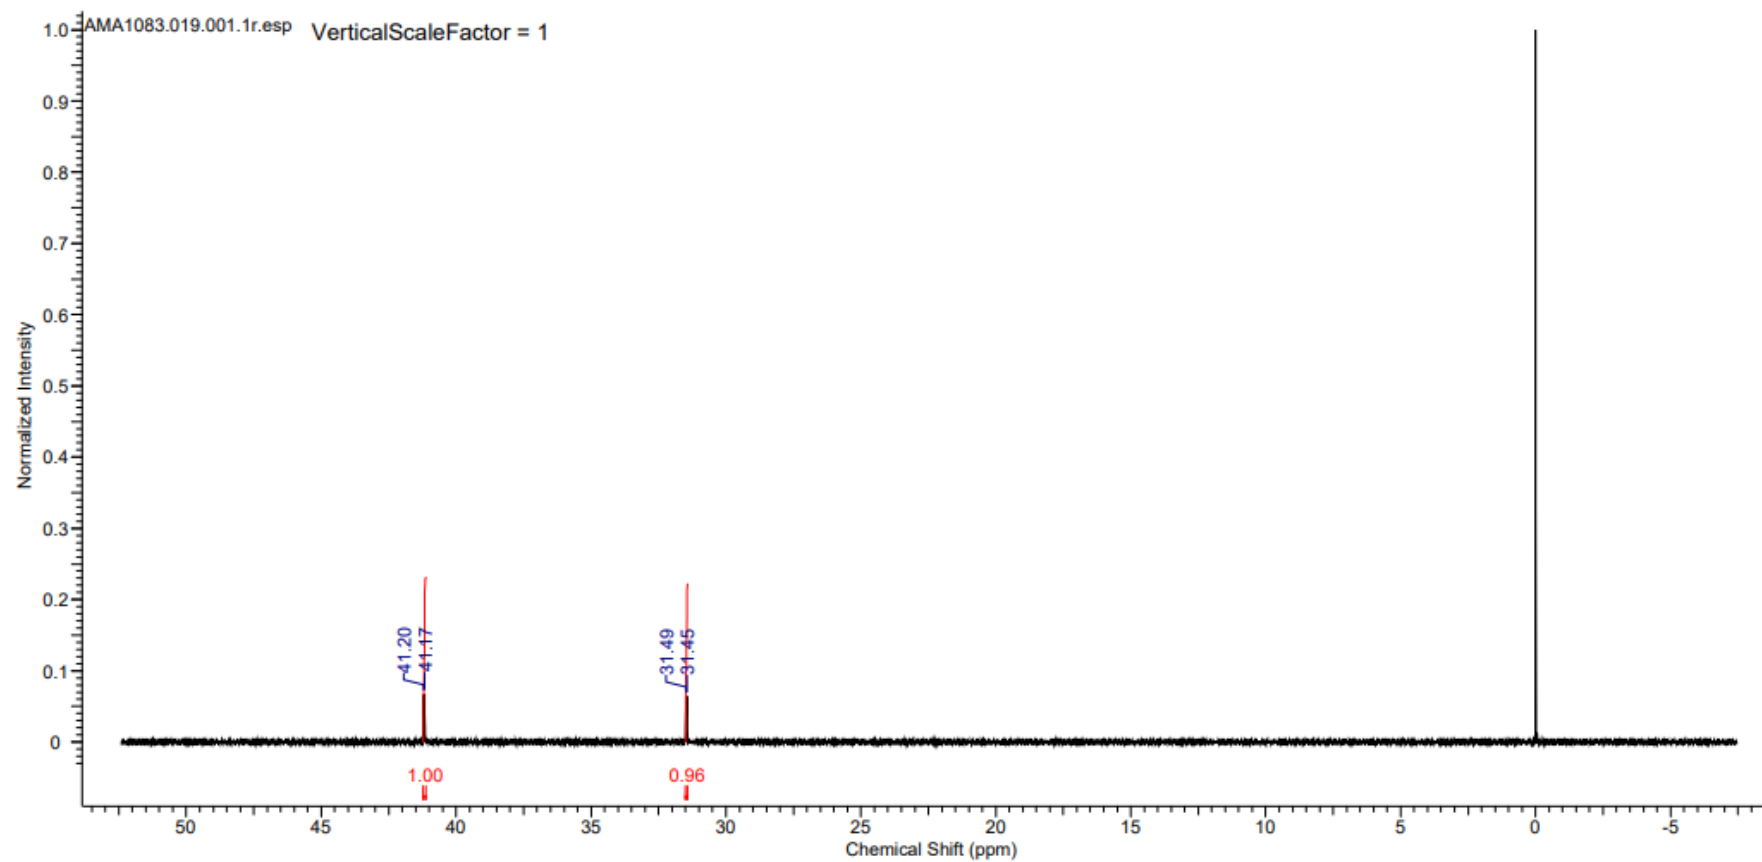

Figure S14. <sup>1</sup>H NMR spectrum of compound **11**

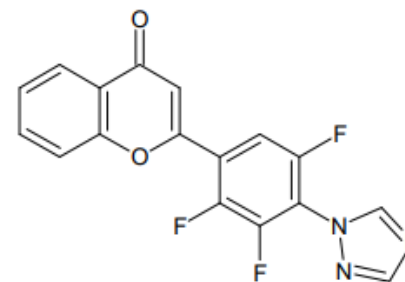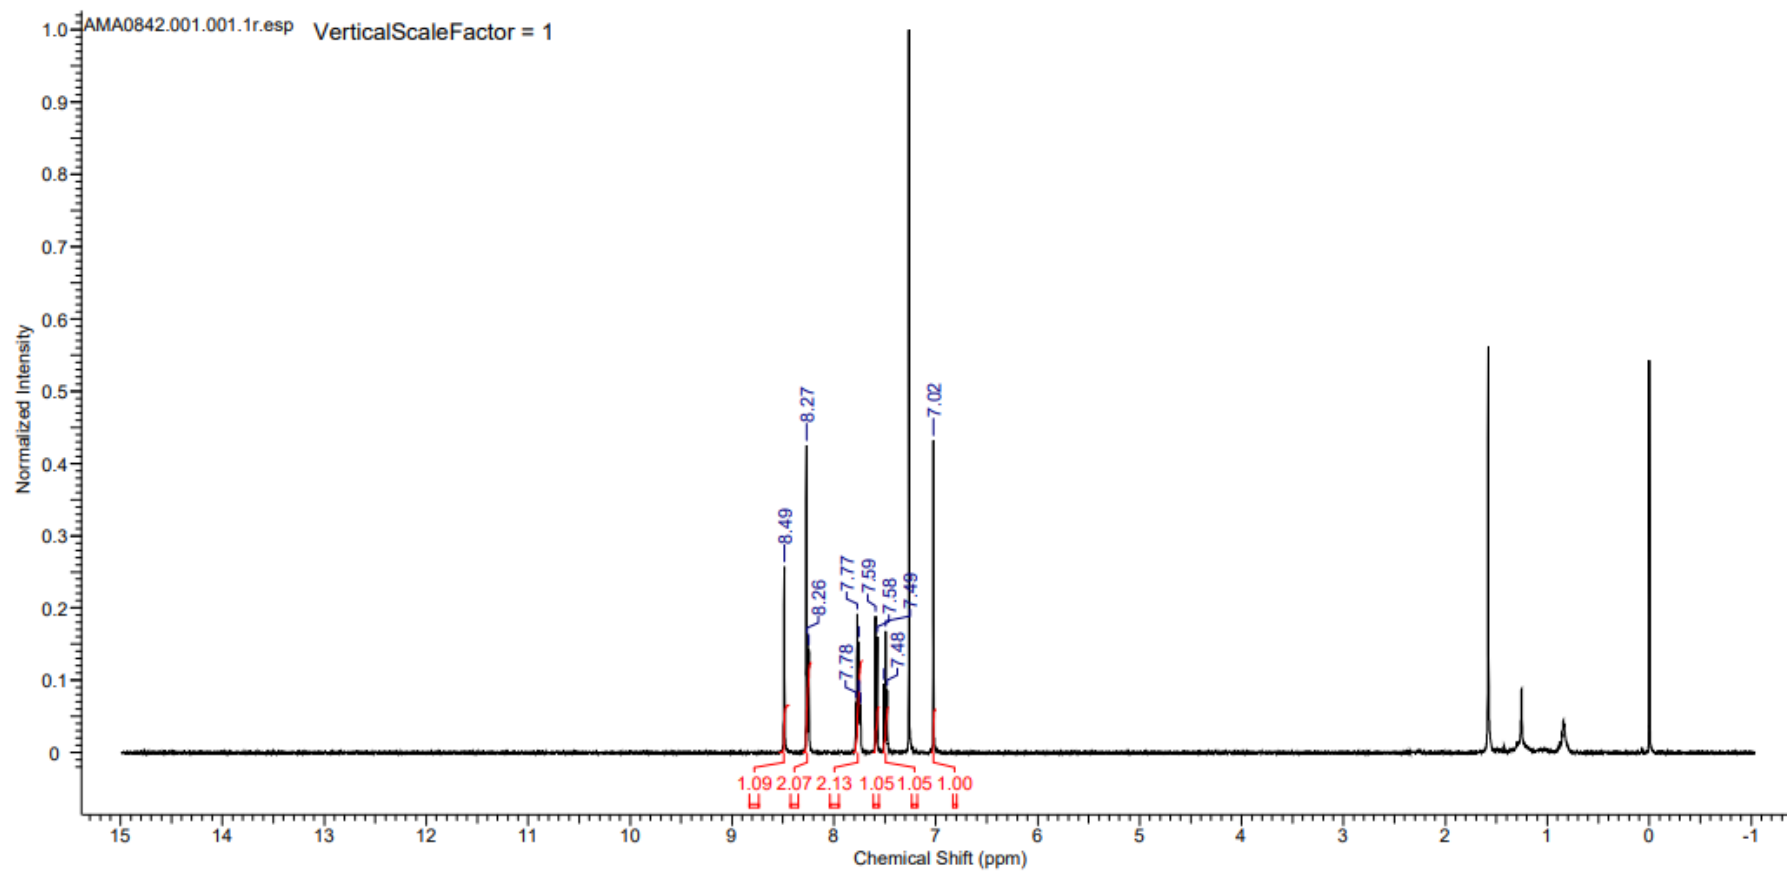

Figure S15.  $^{13}\text{C}$  NMR spectrum of compound 11

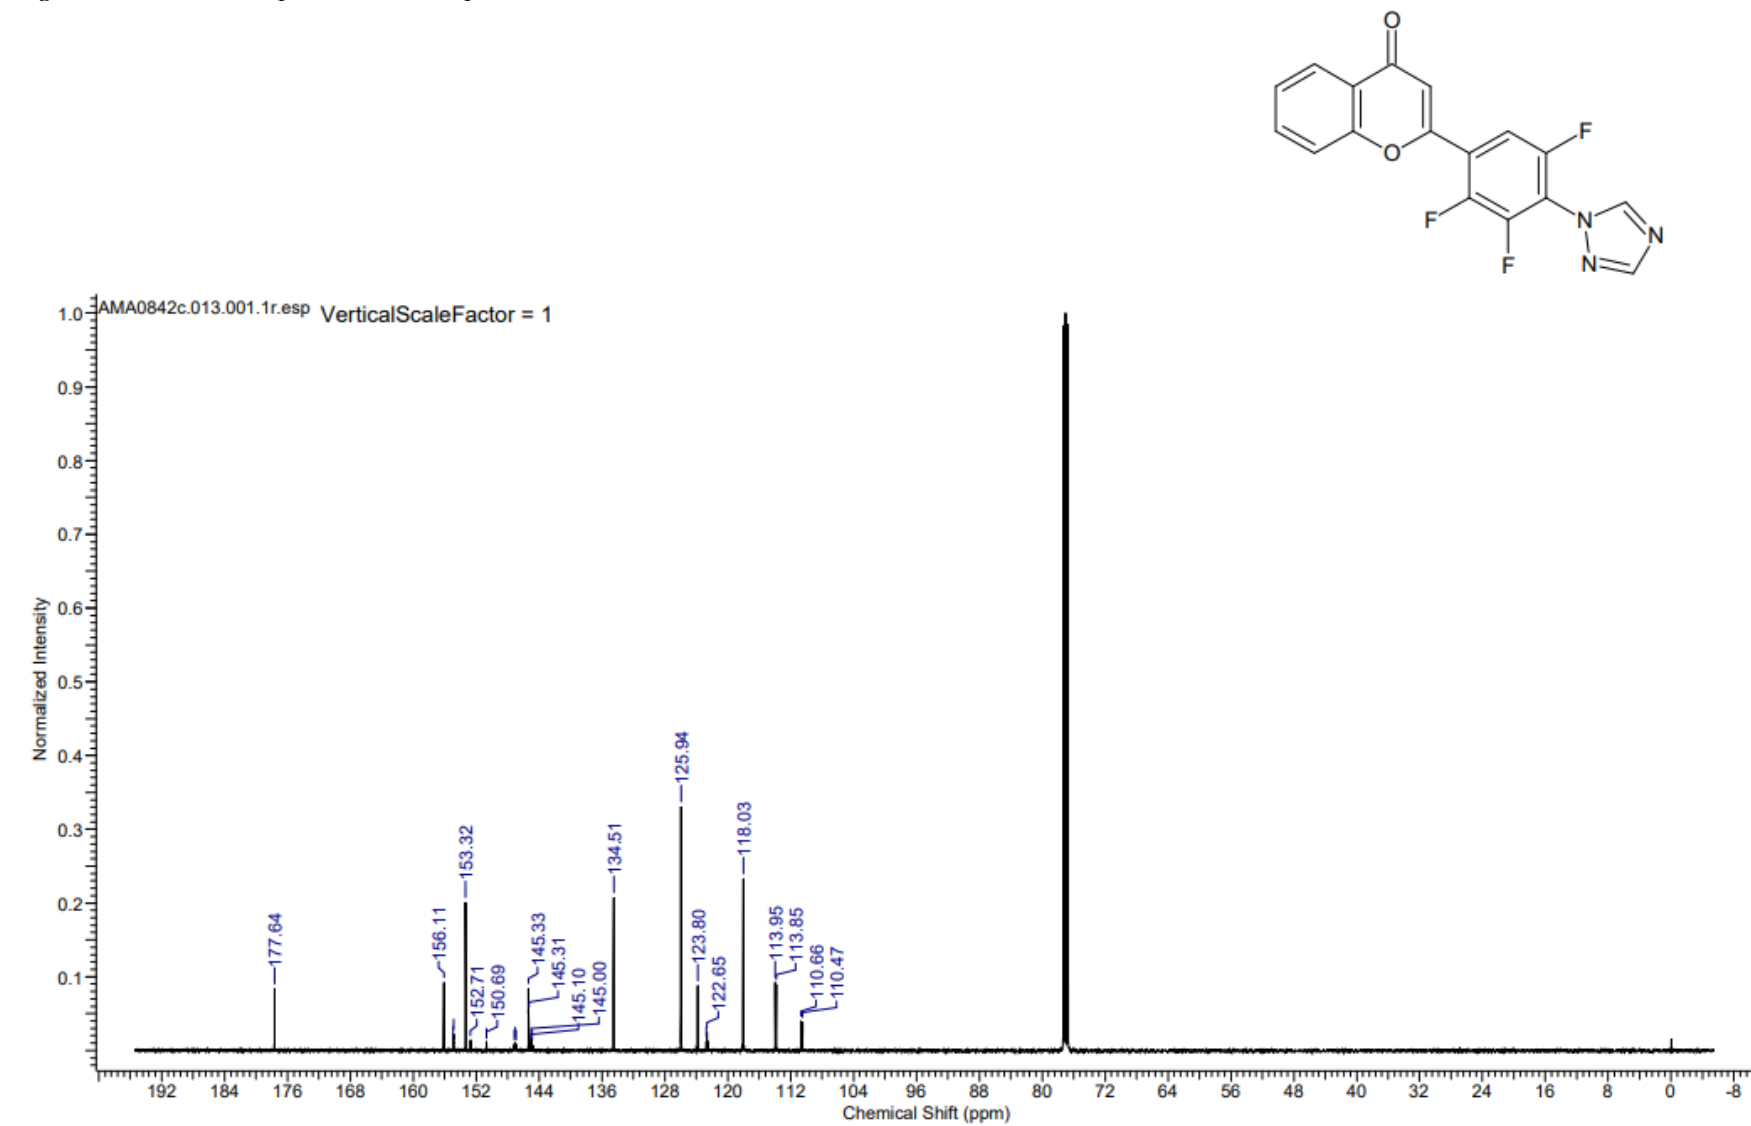

Figure S16.  $^{19}\text{F}$  NMR spectrum of compound **11**

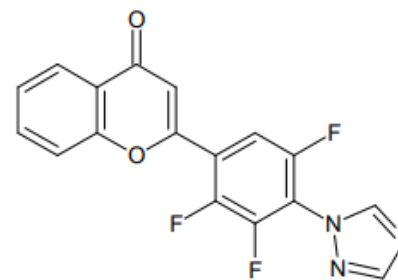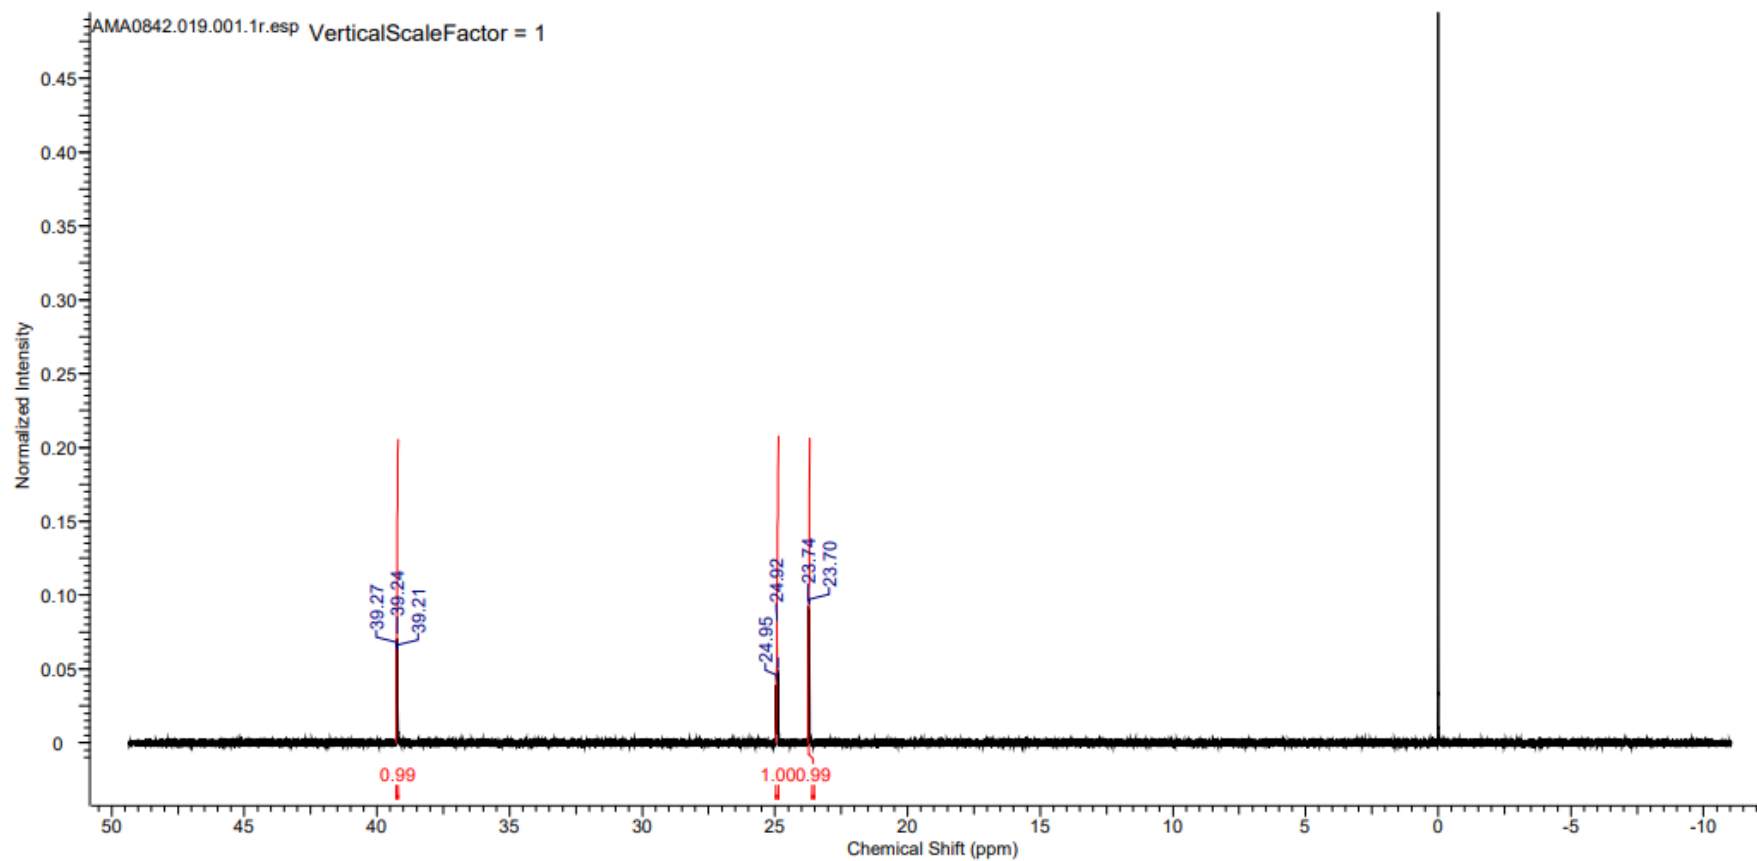



Figure S17.  $^1\text{H}$  NMR spectrum of compound **14**

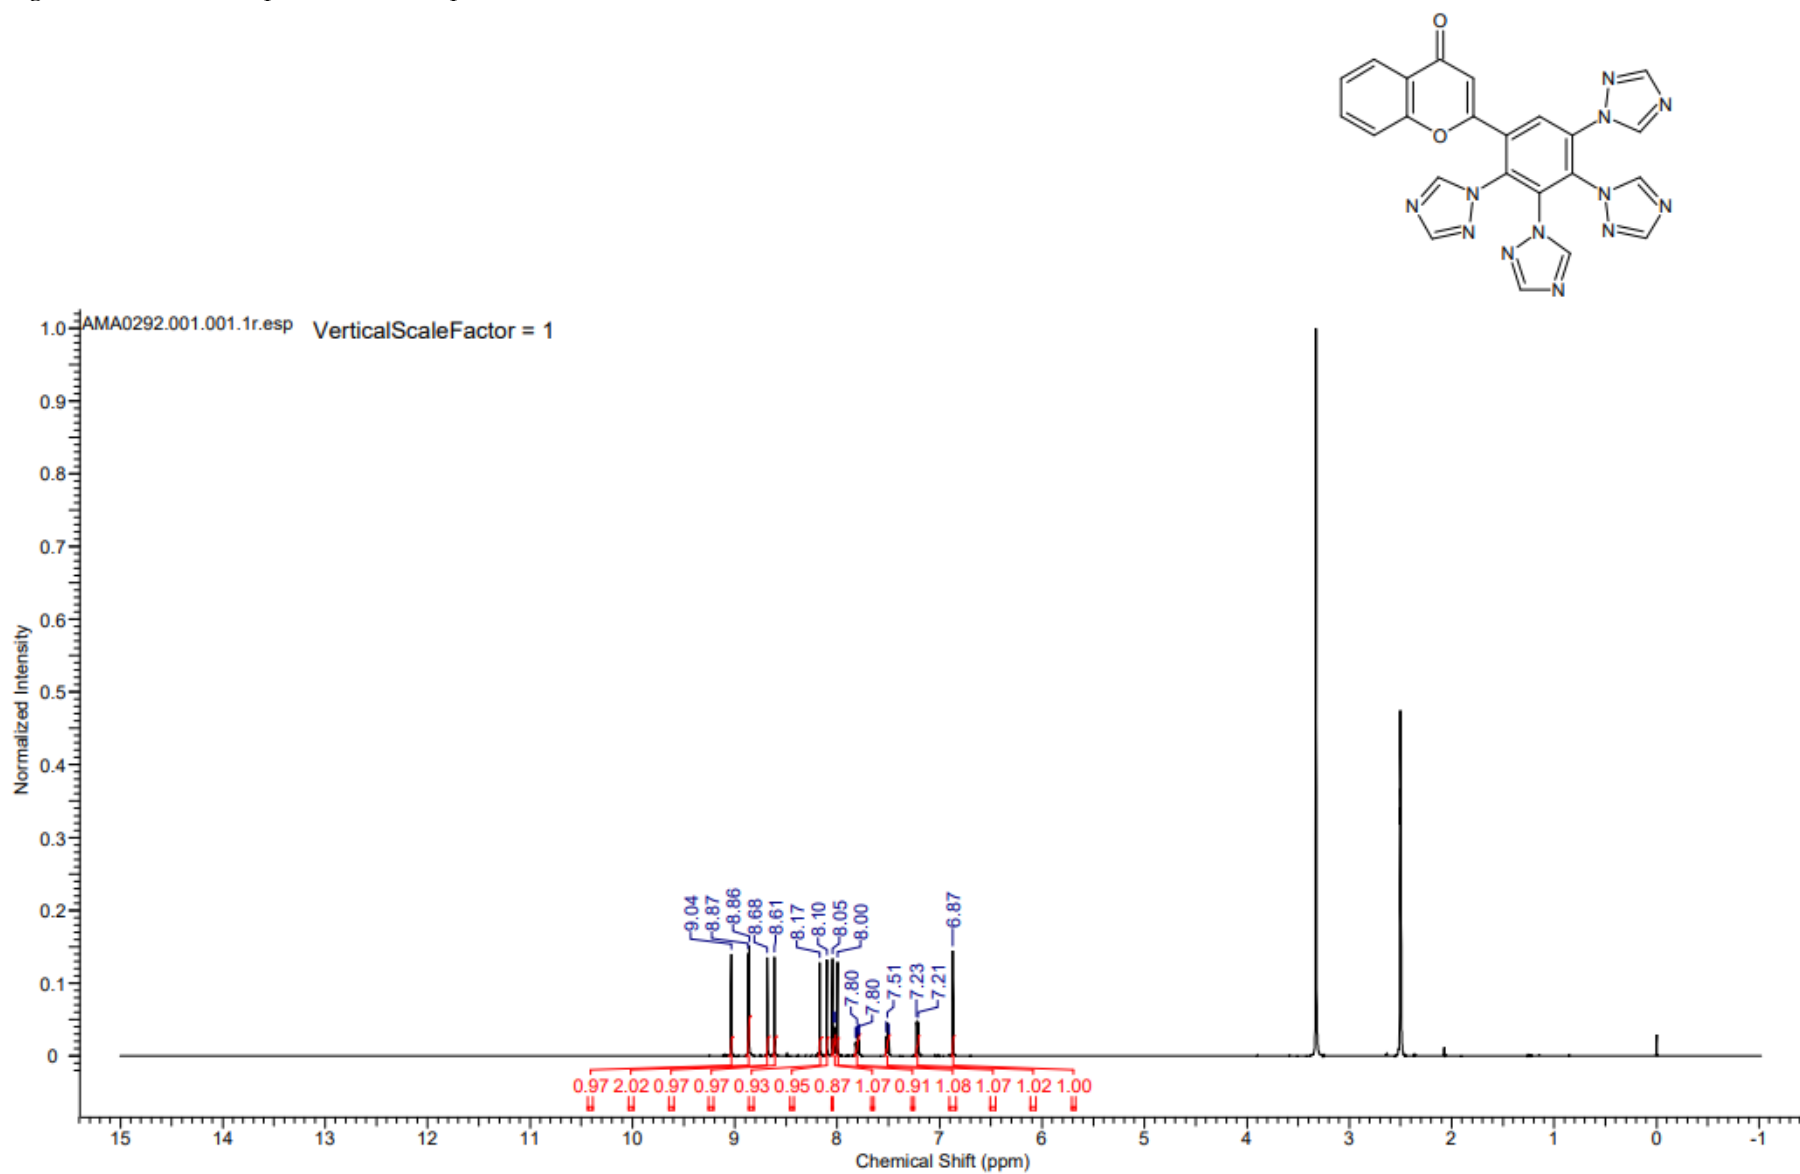

Figure S18.  $^{13}\text{C}$  NMR spectrum of compound **14**

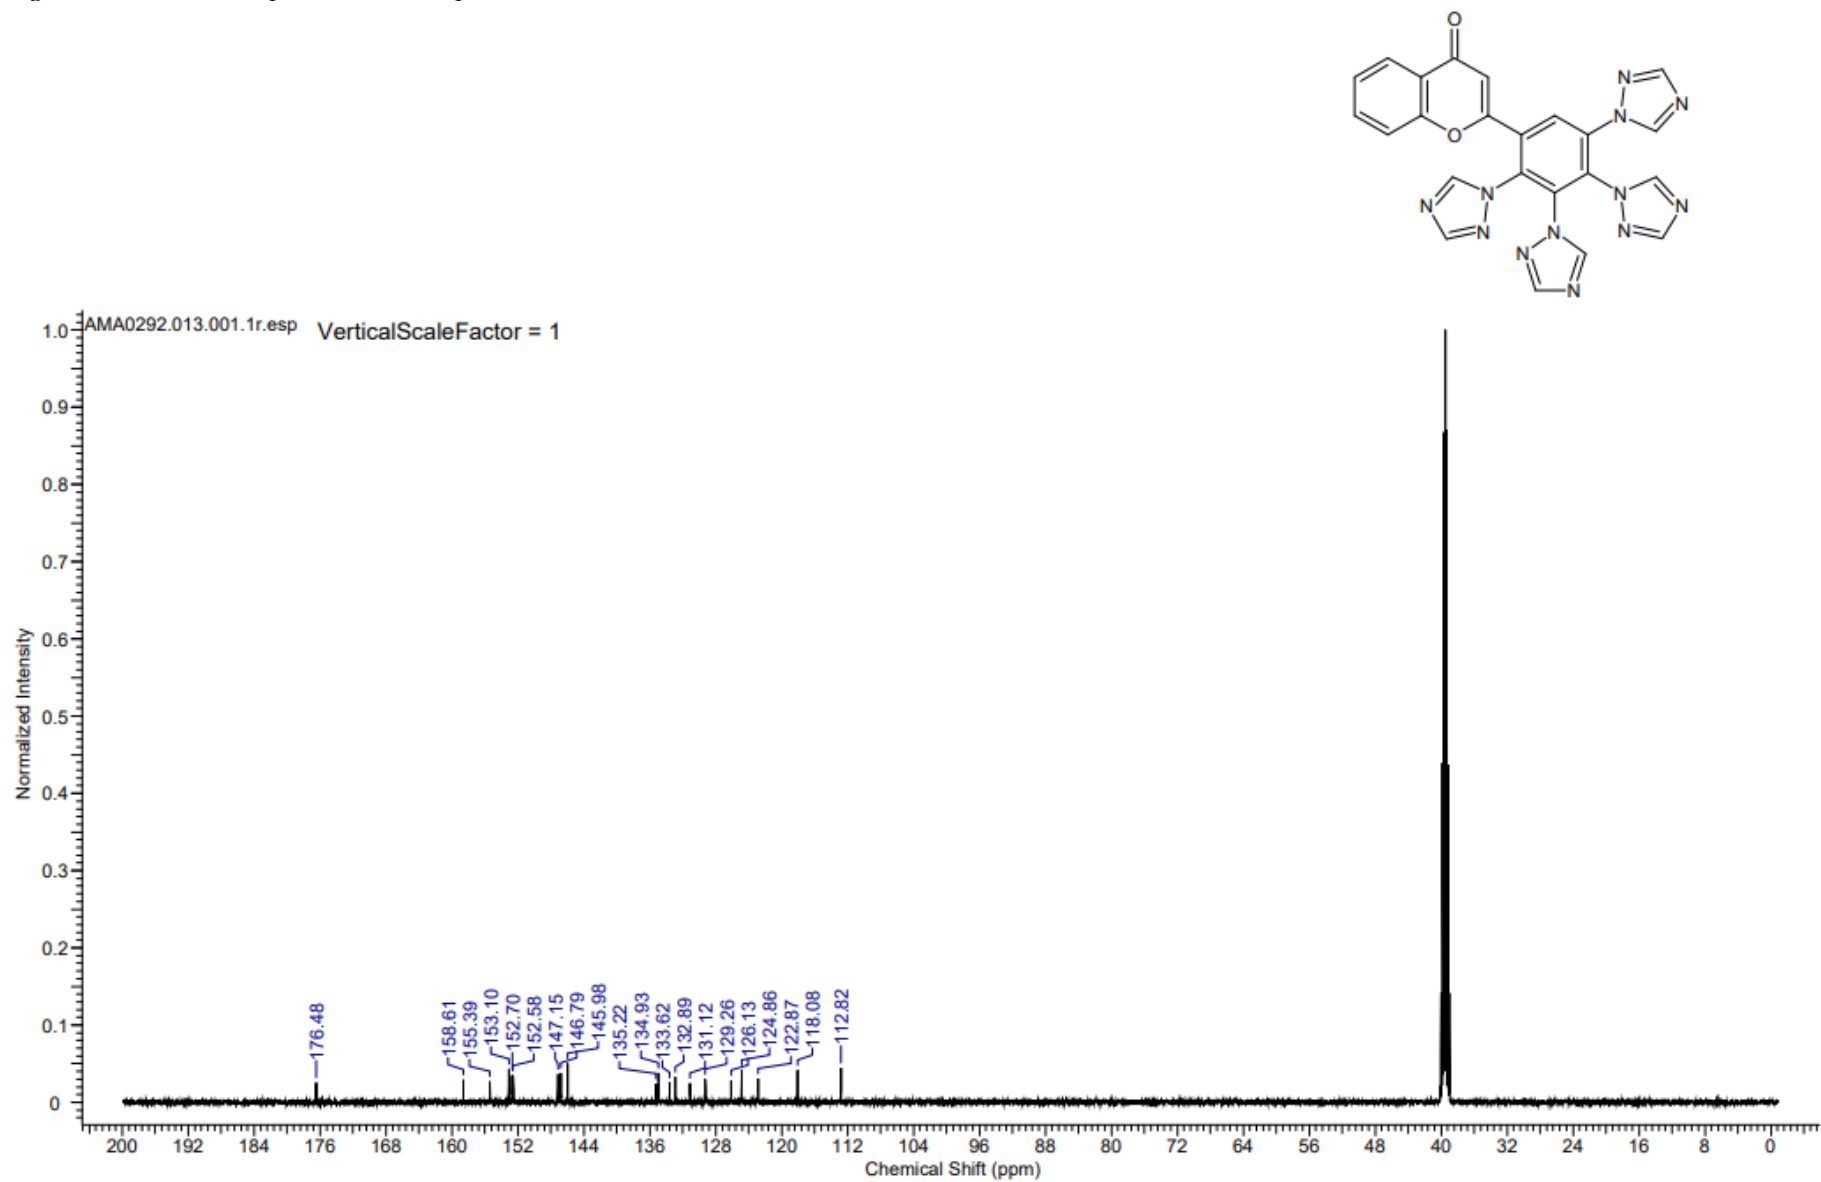

Figure S19.  $^1\text{H}$  NMR spectrum of compound 15

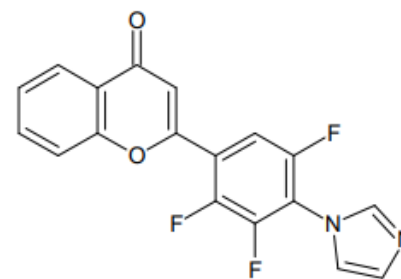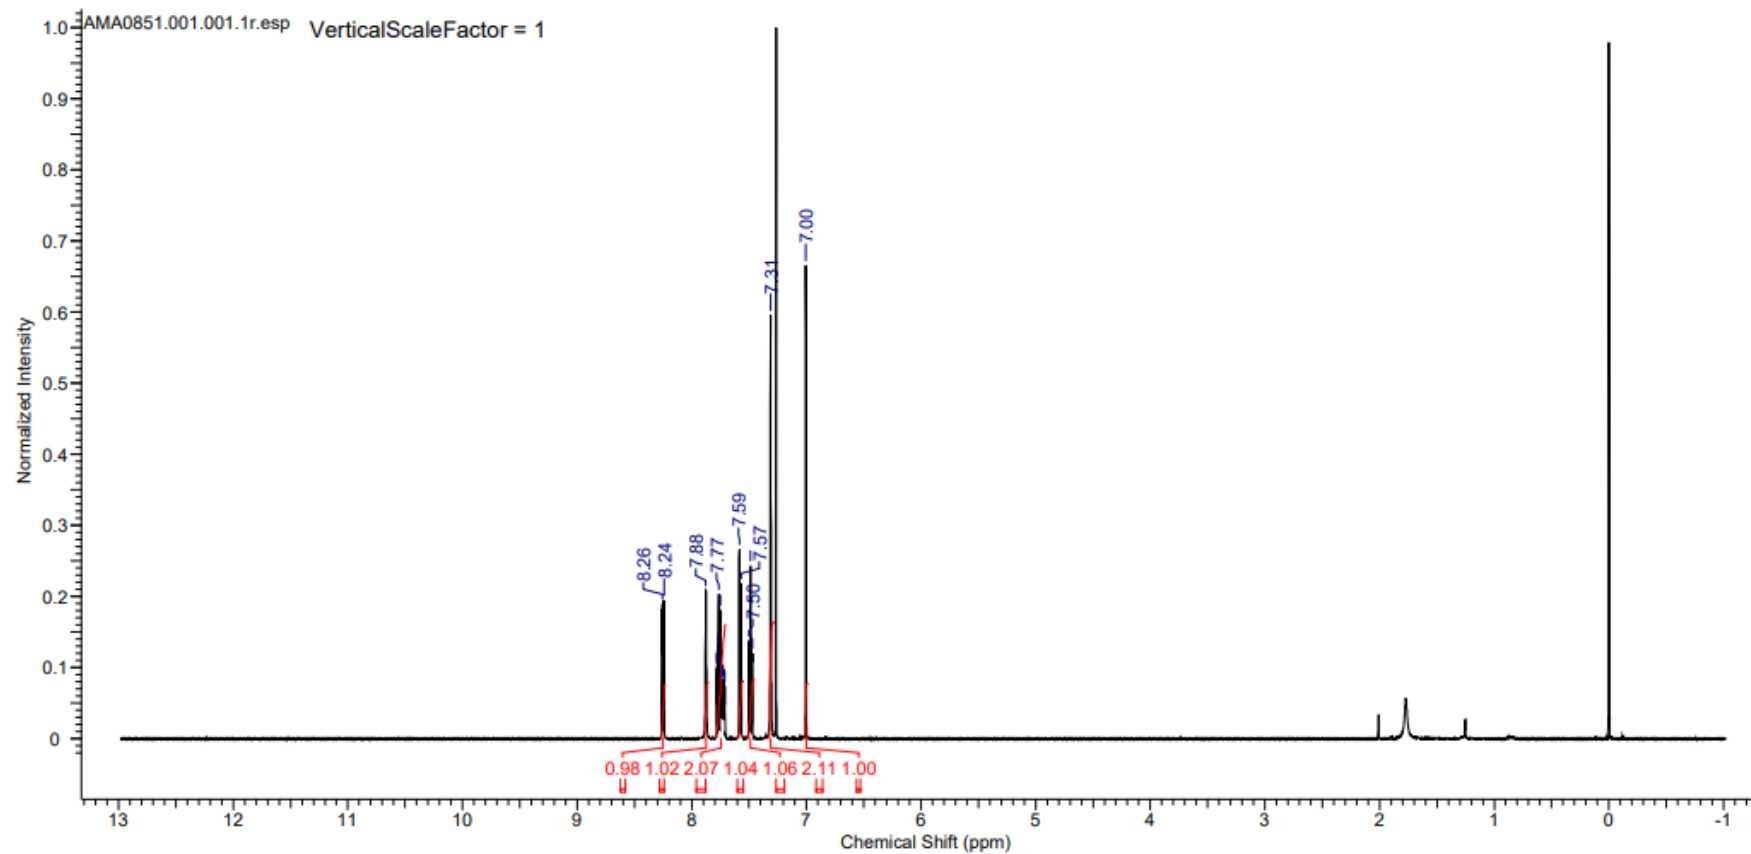

Figure S20.  $^{13}\text{C}$  NMR spectrum of compound **15**

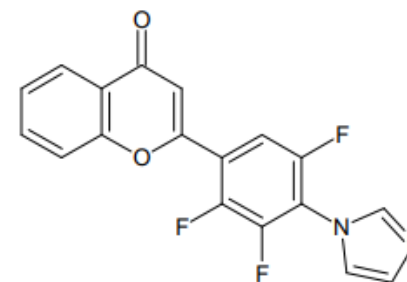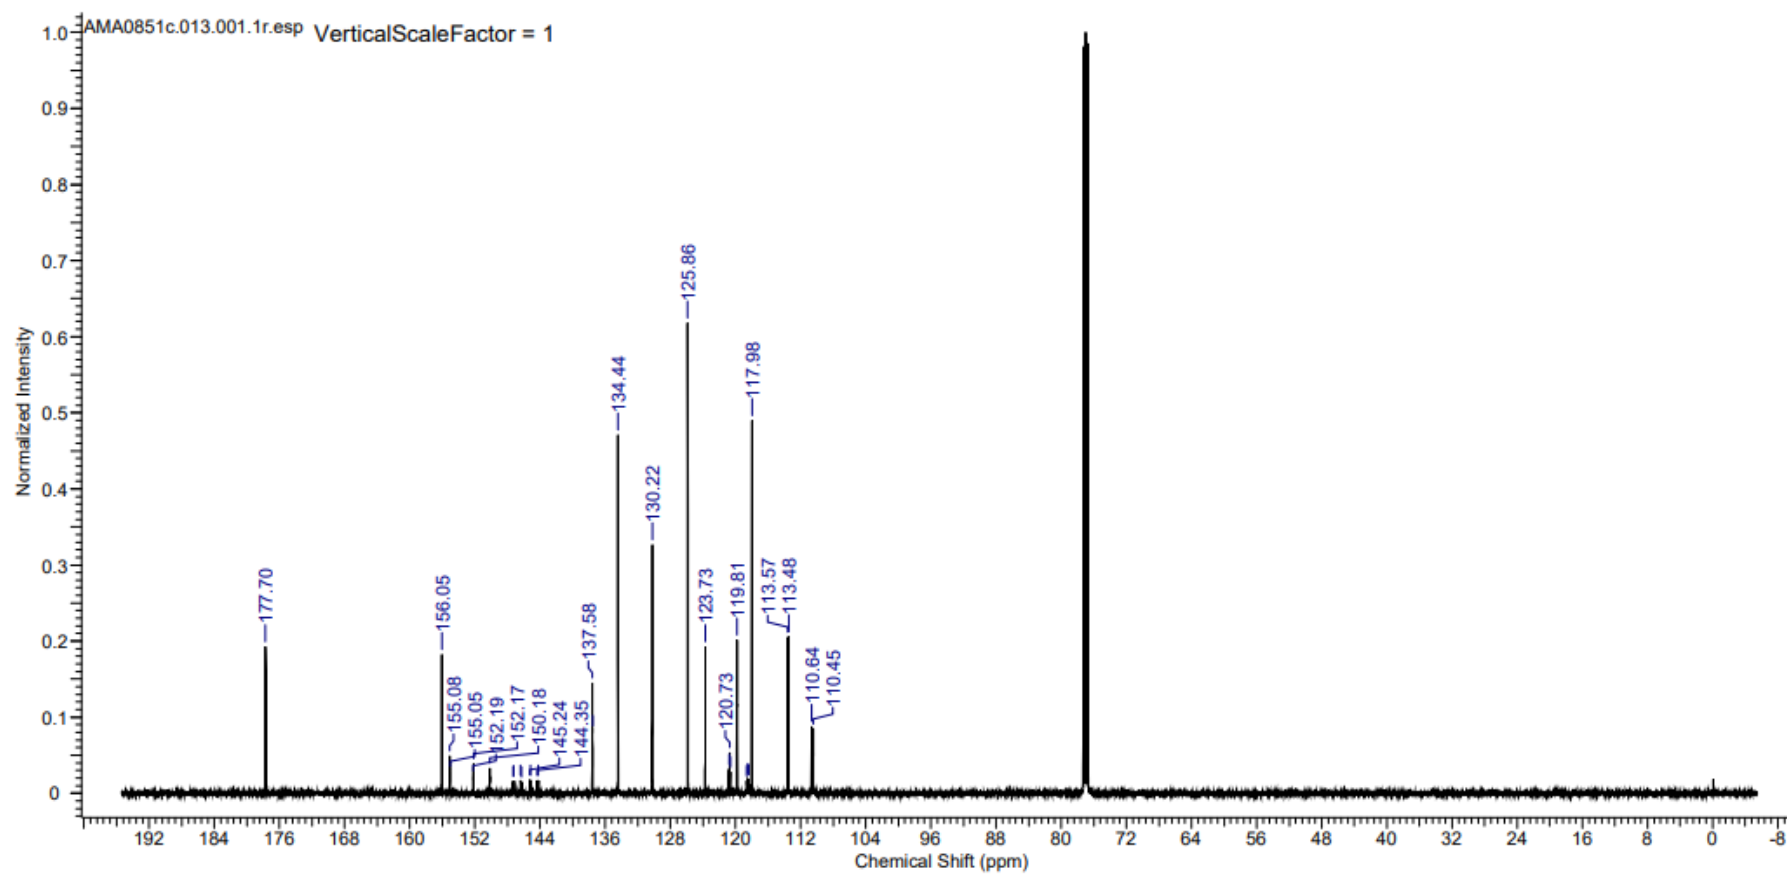

Figure S21.  $^{19}\text{F}$  NMR spectrum of compound 15

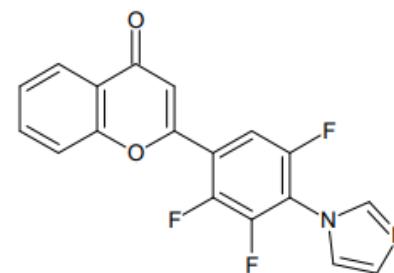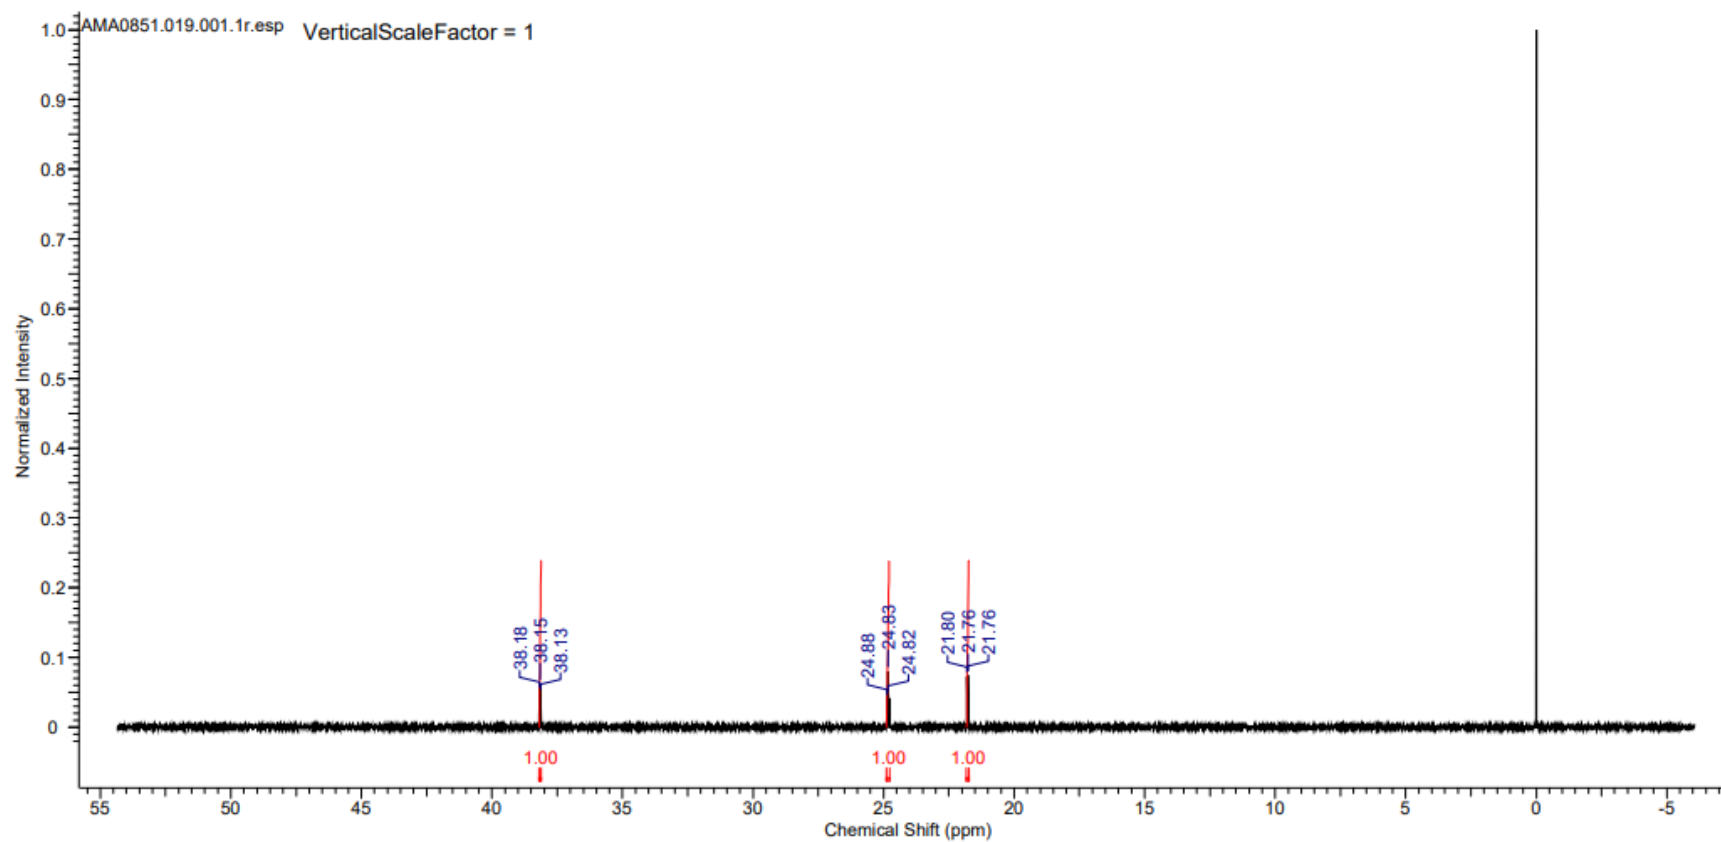

Figure S22. <sup>1</sup>H NMR spectrum of compound 17

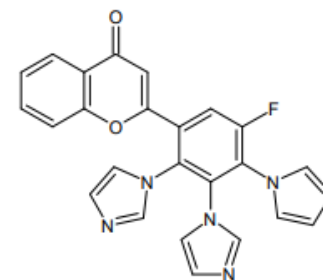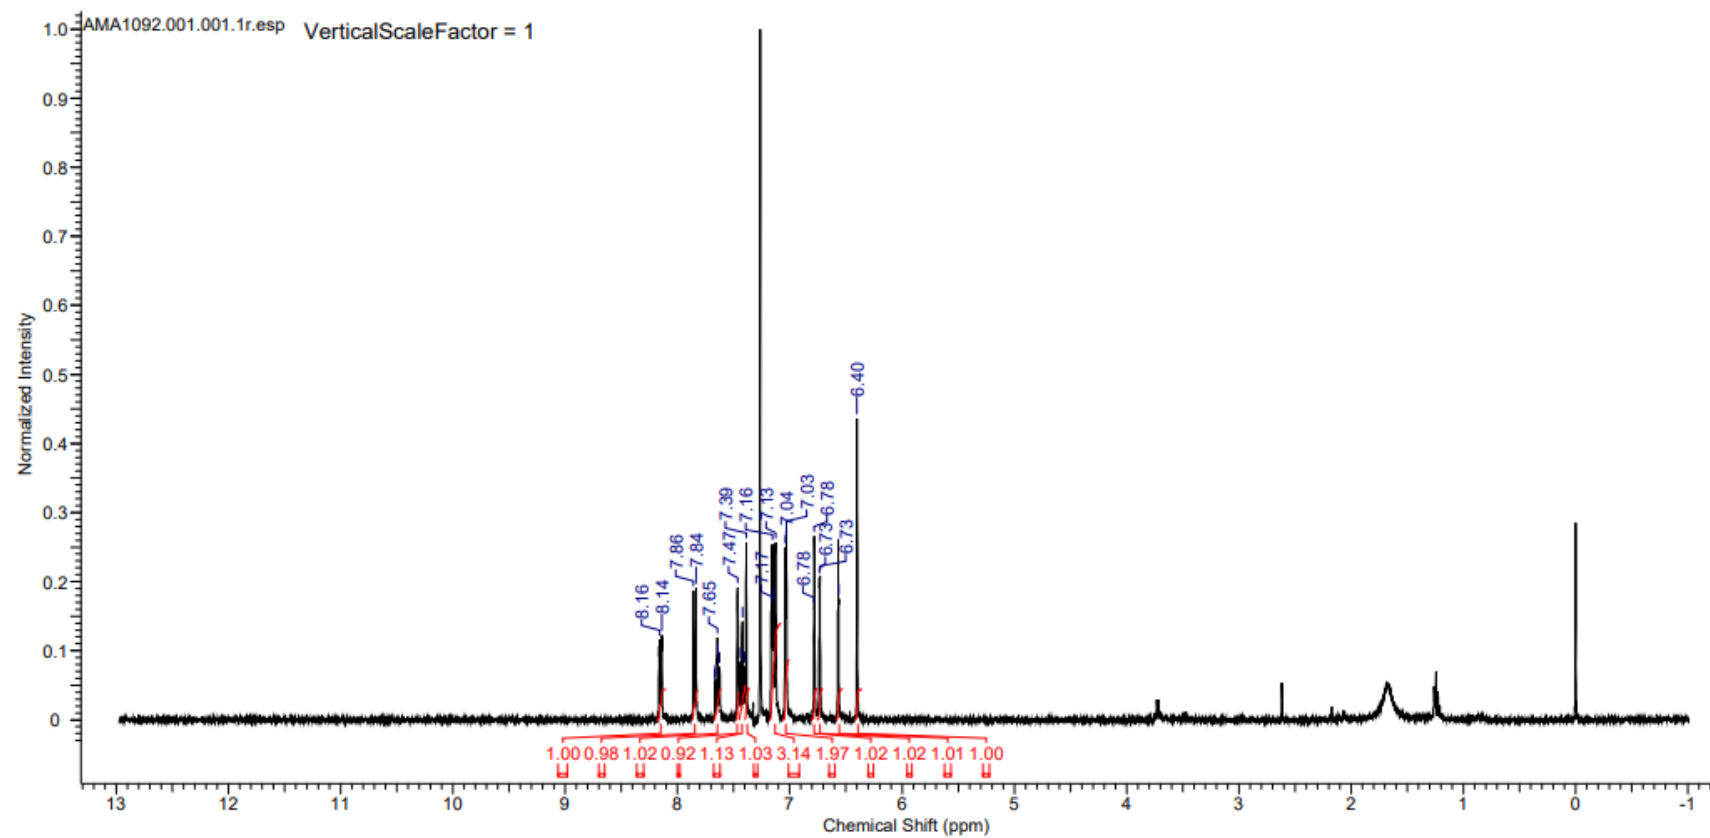

Figure S23.  $^{13}\text{C}$  NMR spectrum of compound **17**

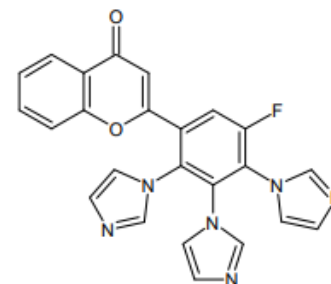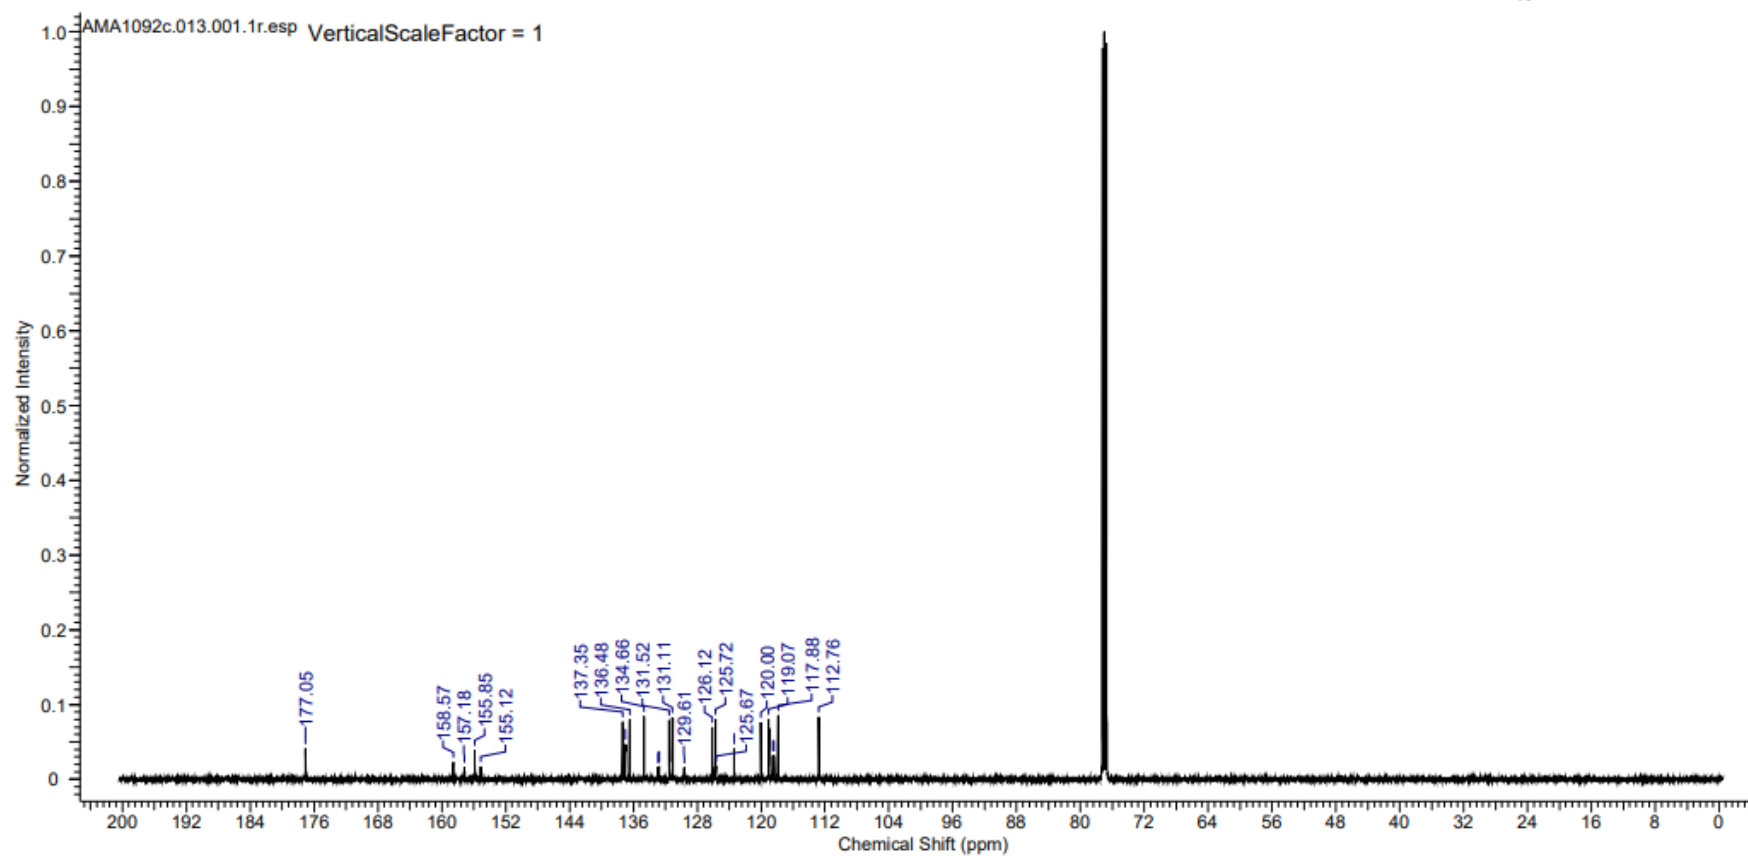

Figure S24.  $^{19}\text{F}$  NMR spectrum of compound 17

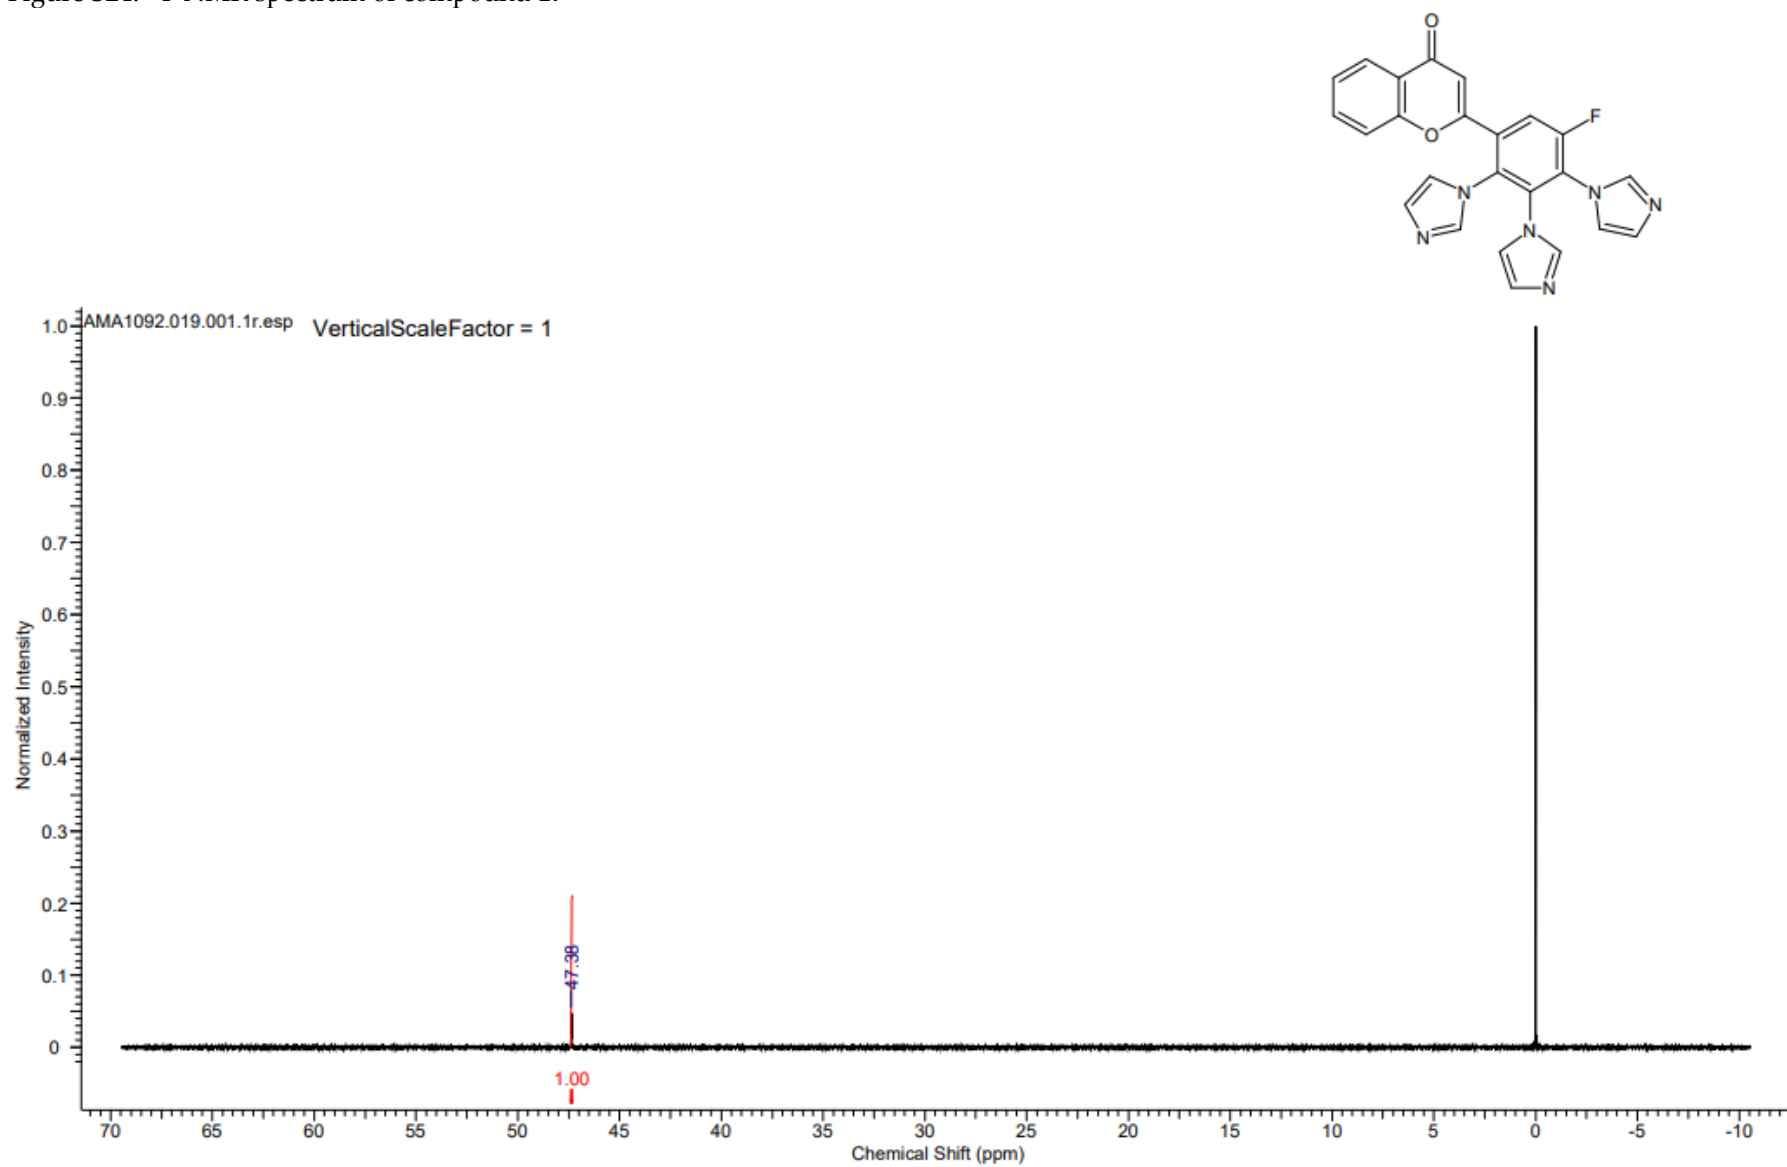



Figure S25.  $^1\text{H}$  NMR spectrum of compound **18**

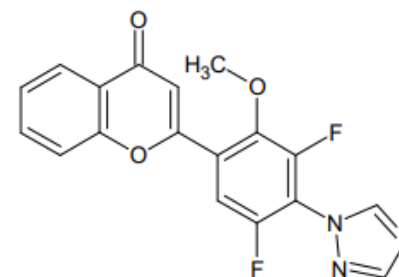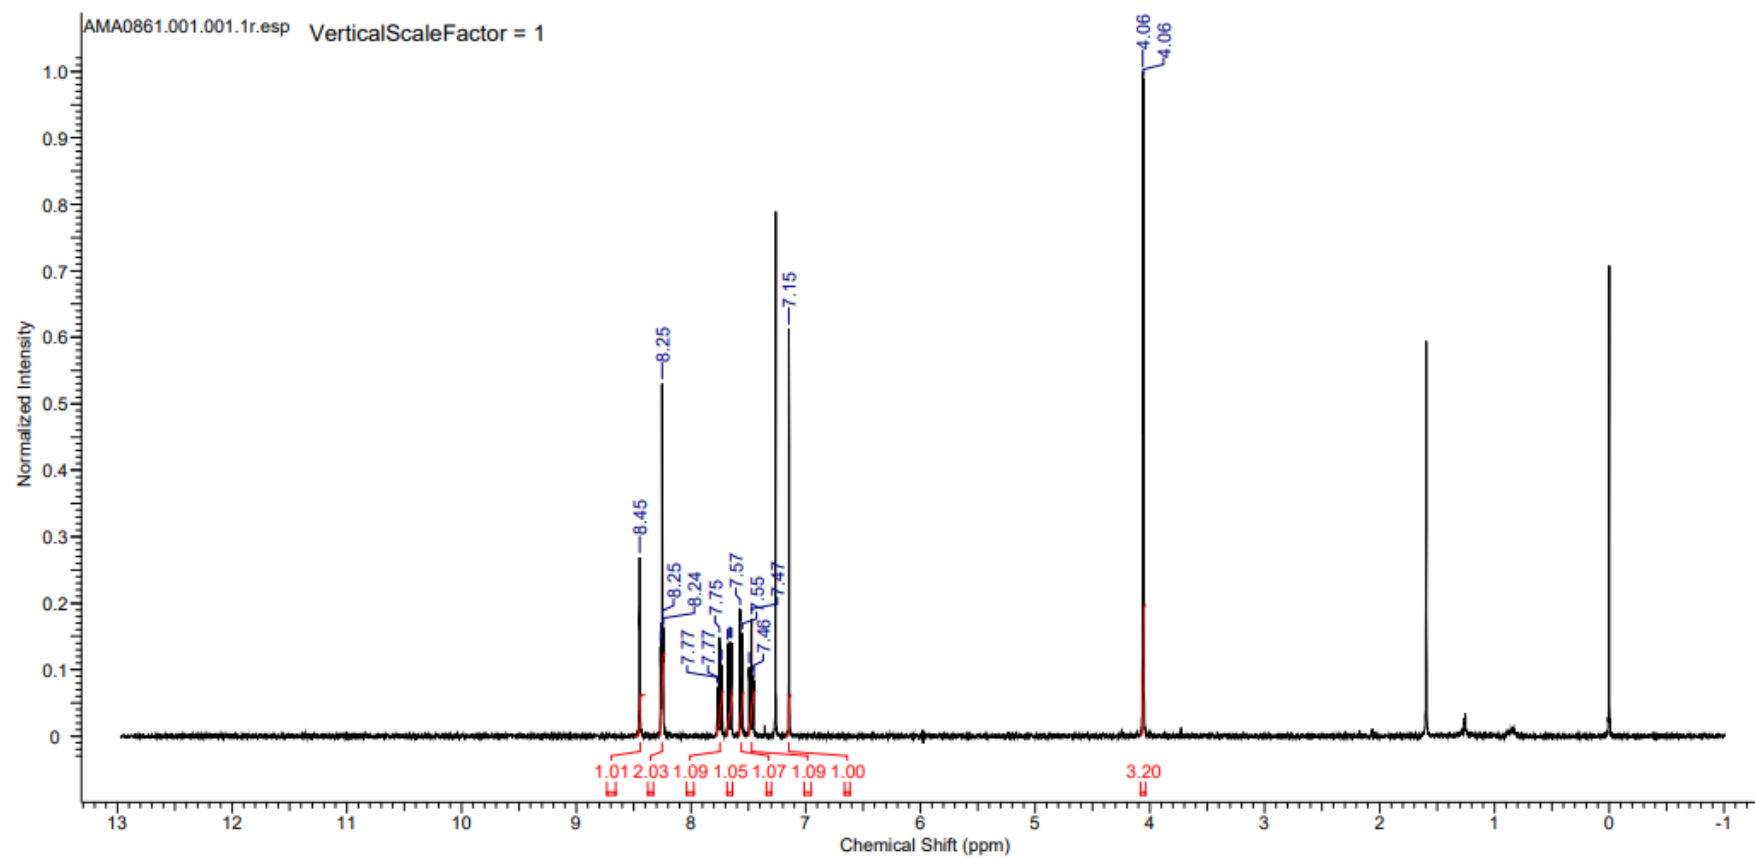

Figure S26.  $^{13}\text{C}$  NMR spectrum of compound **18**

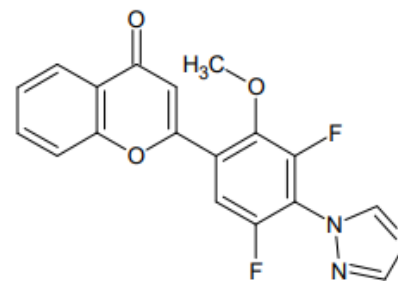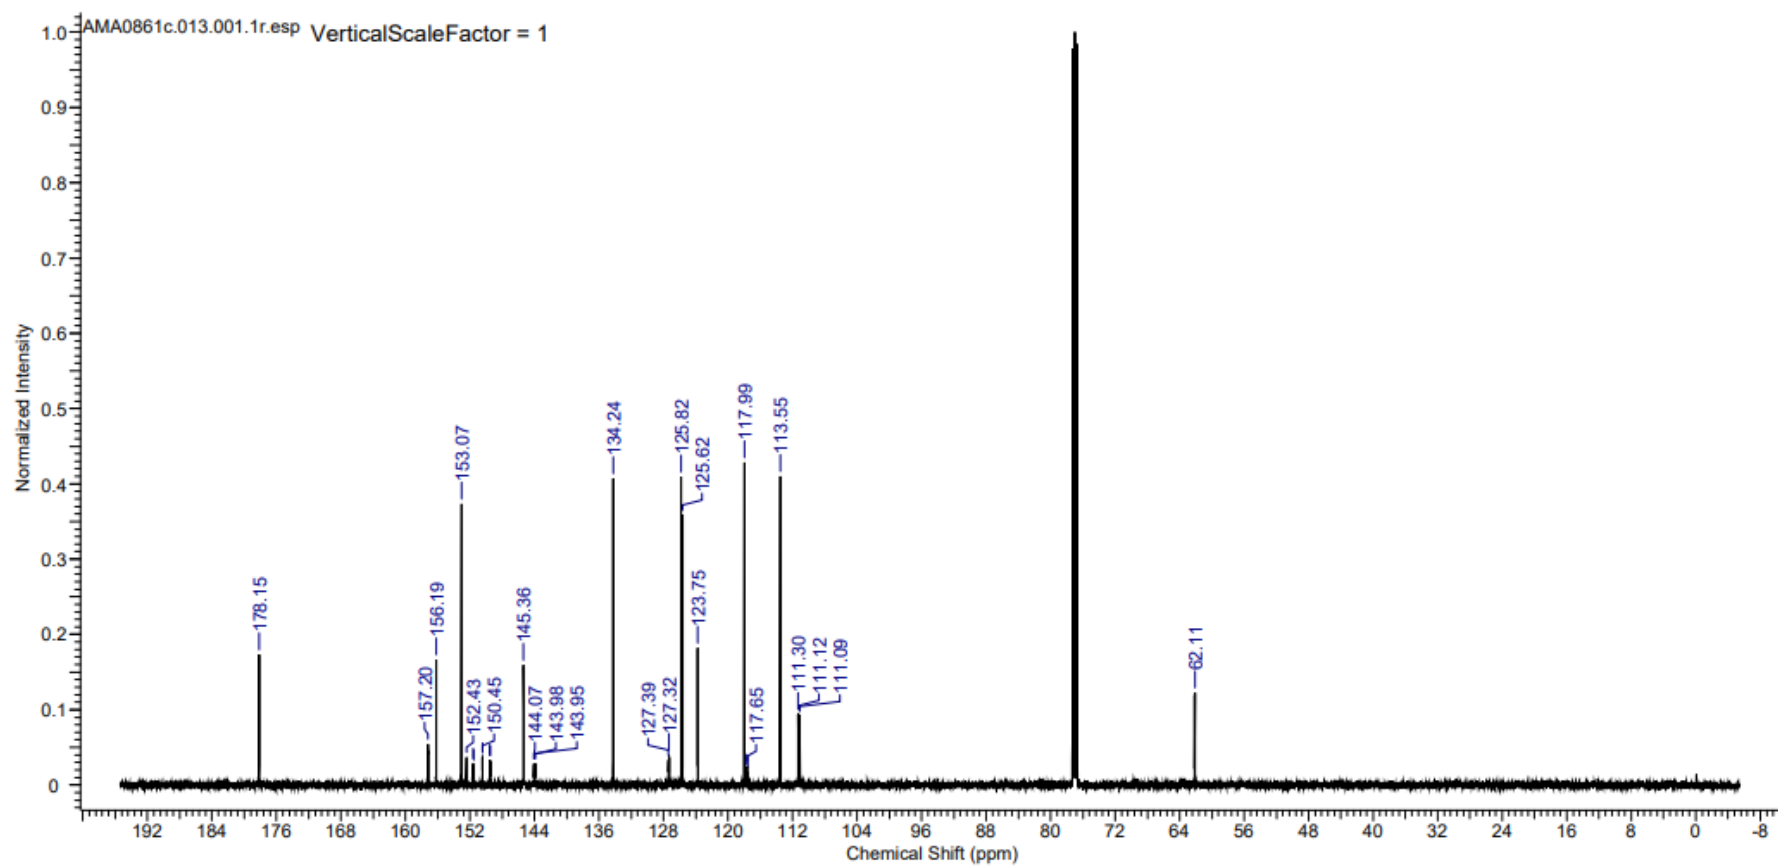

Figure S27.  $^{19}\text{F}$  NMR spectrum of compound **18**

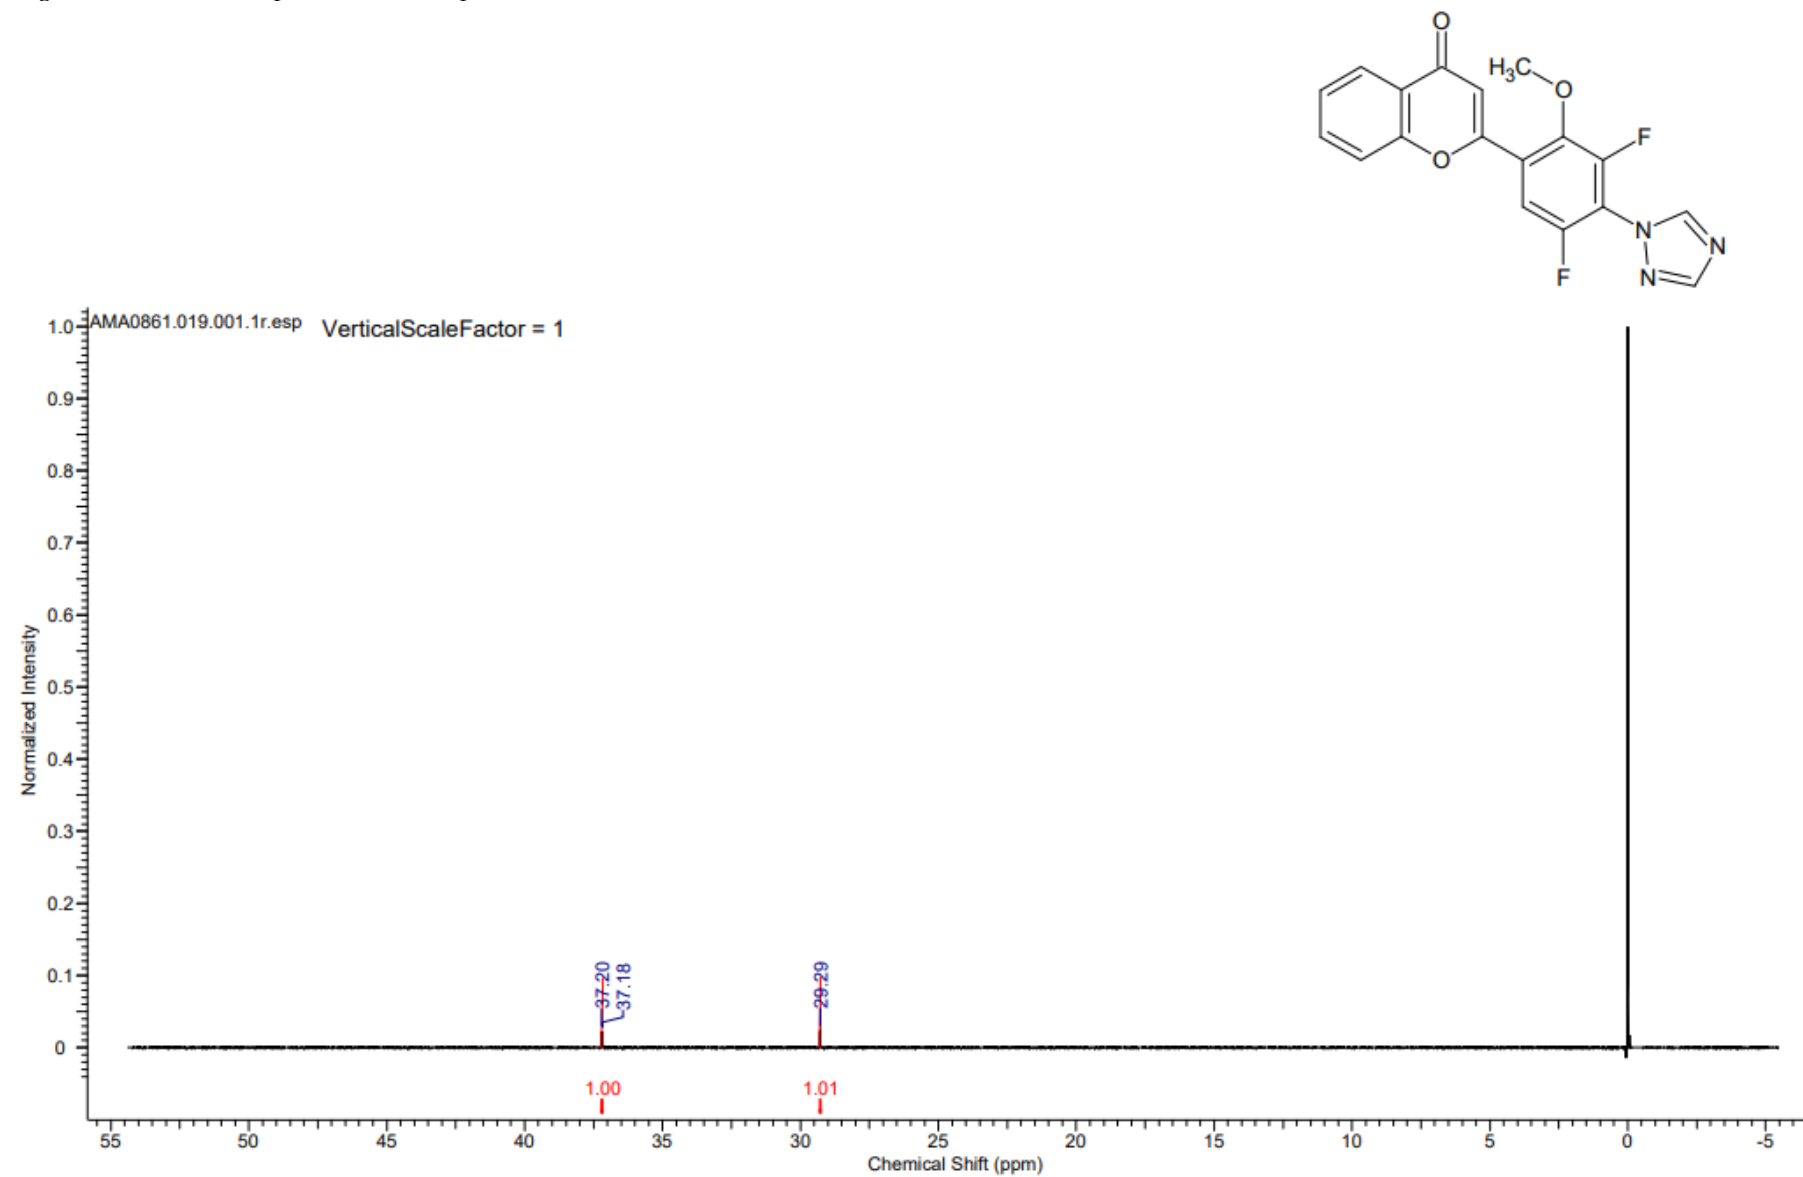

Figure S28.  $^1\text{H}$  NMR spectrum of compound **19**

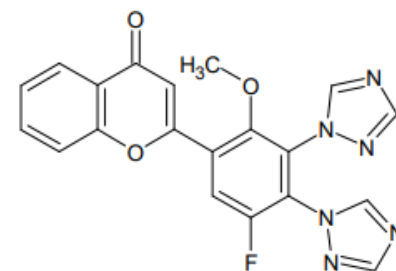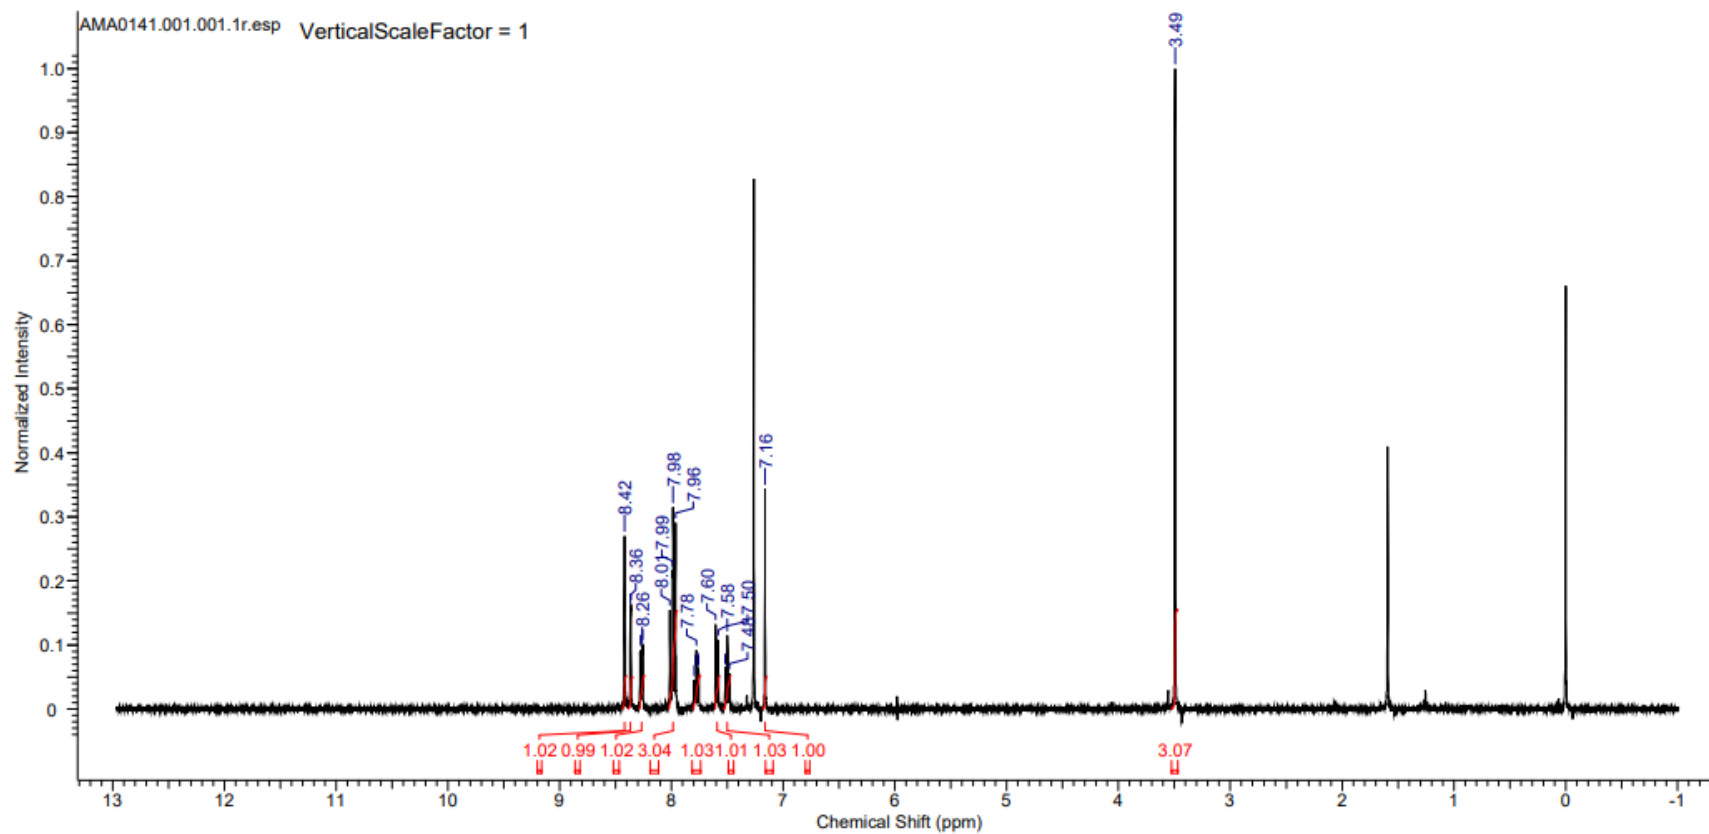

Figure S29.  $^{13}\text{C}$  NMR spectrum of compound **19**

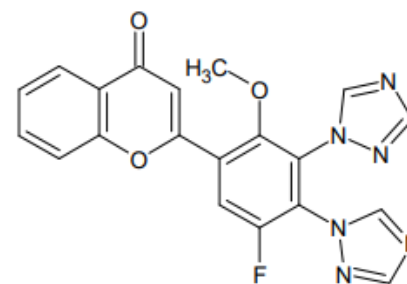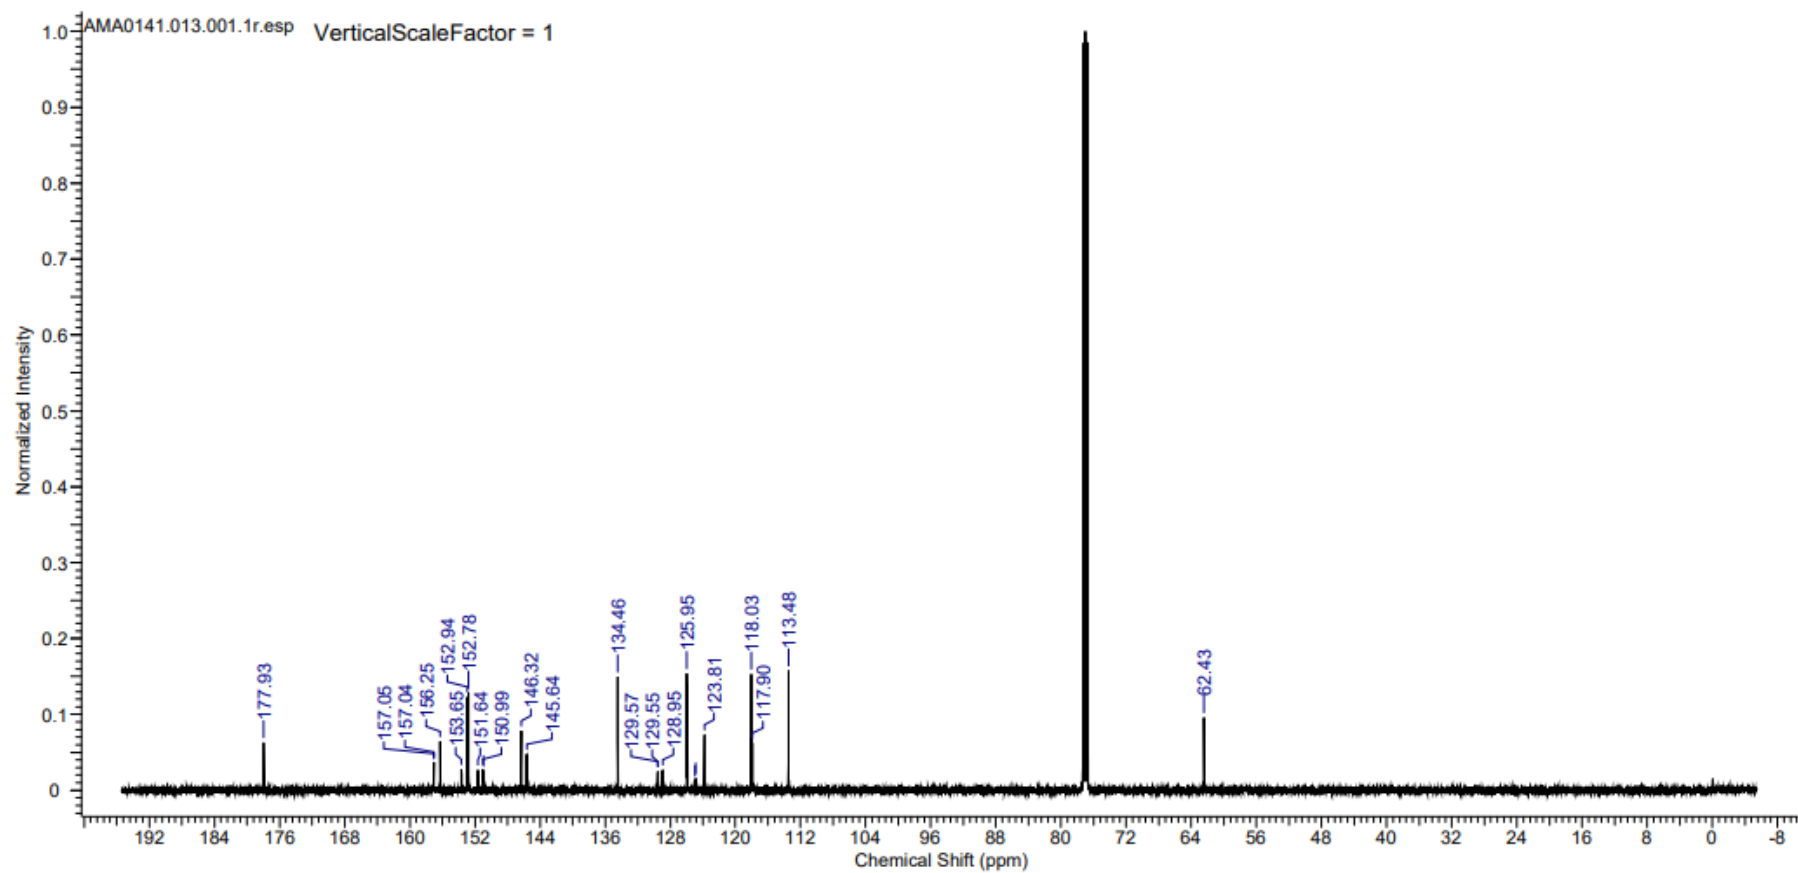

Figure S30.  $^{19}\text{F}$  NMR spectrum of compound **19**

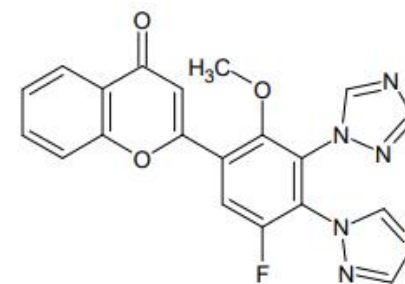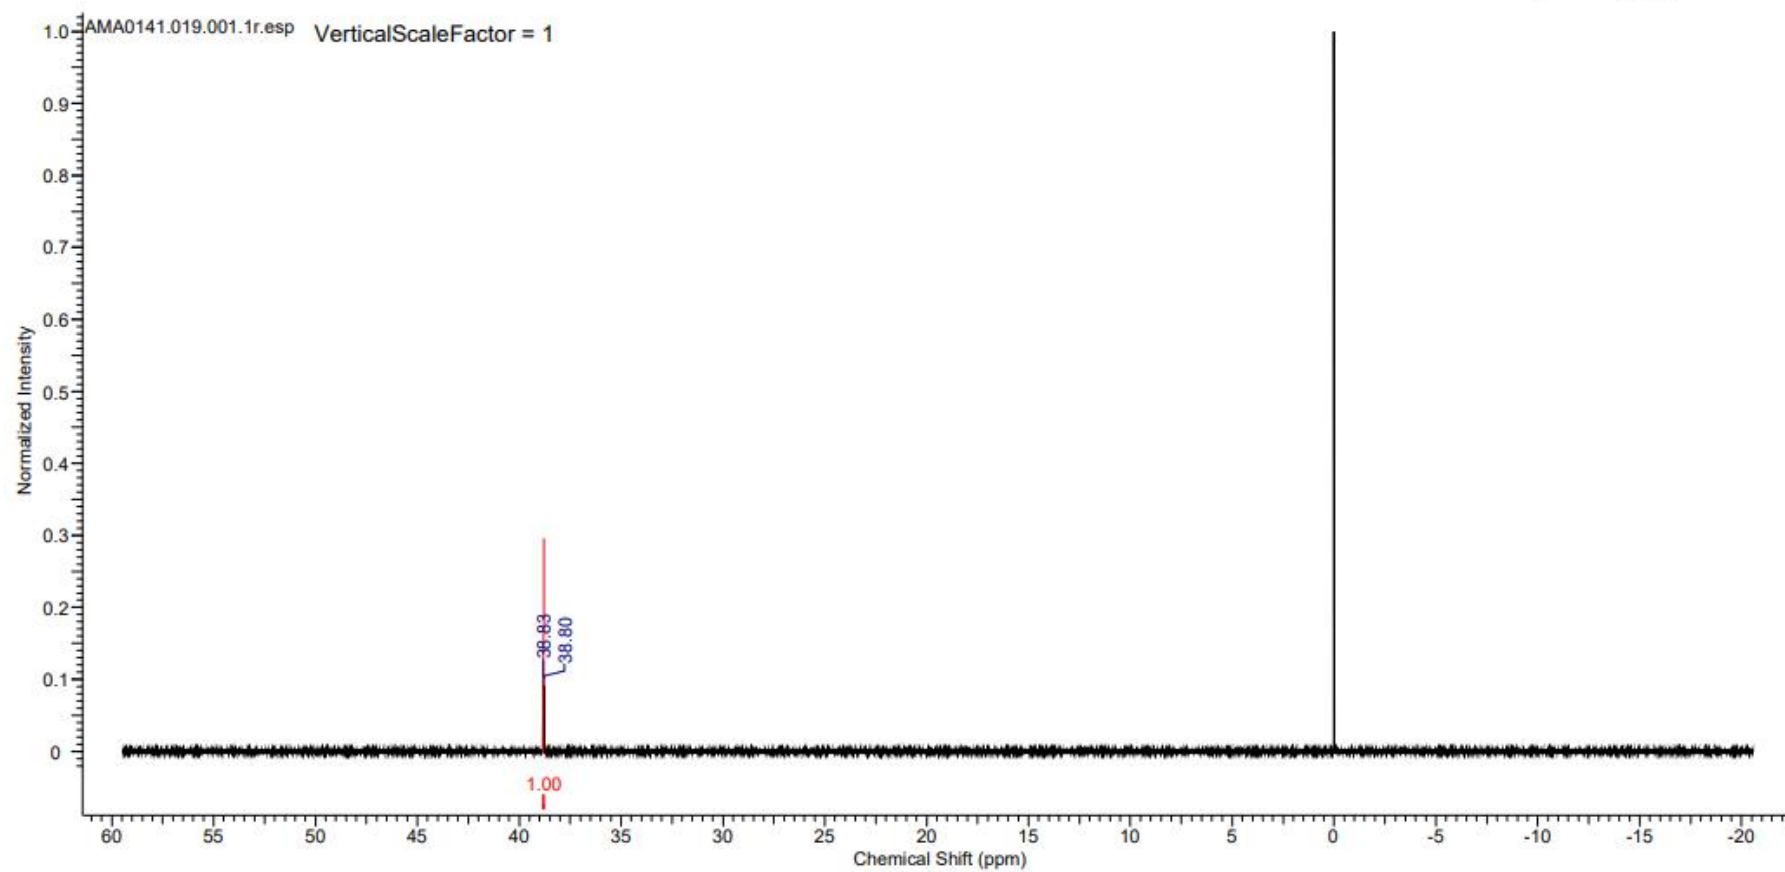

Figure S31. <sup>1</sup>H NMR spectrum of compound 22

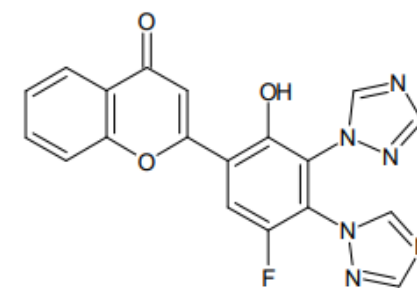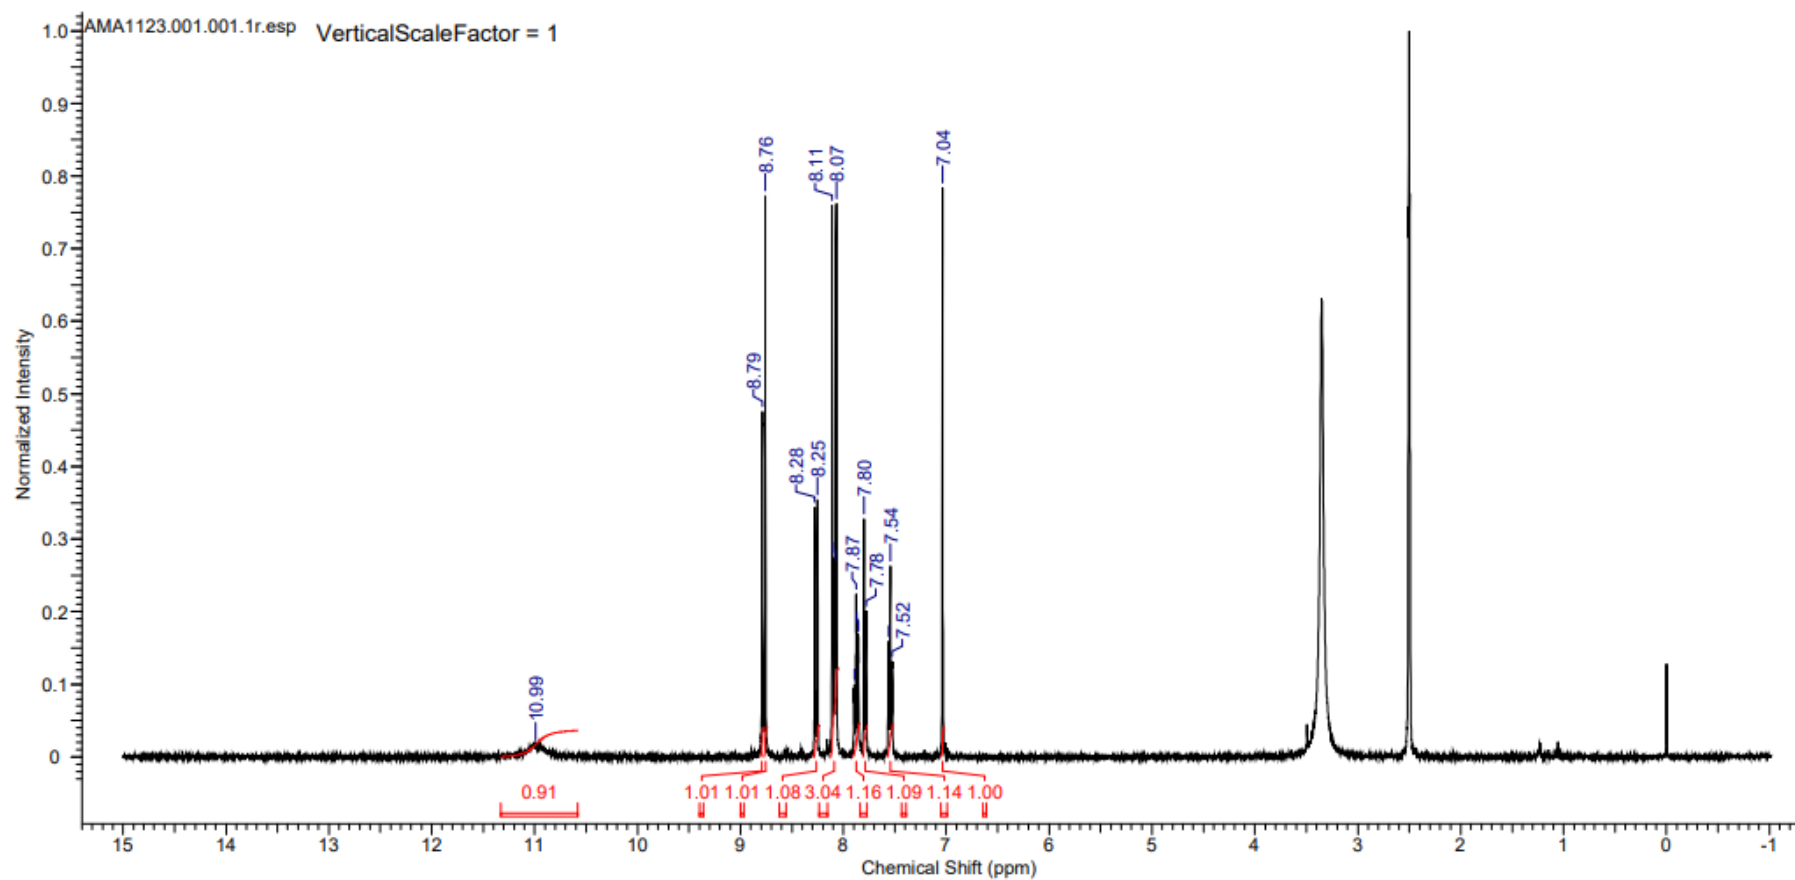

Figure S32.  $^{13}\text{C}$  NMR spectrum of compound **22**

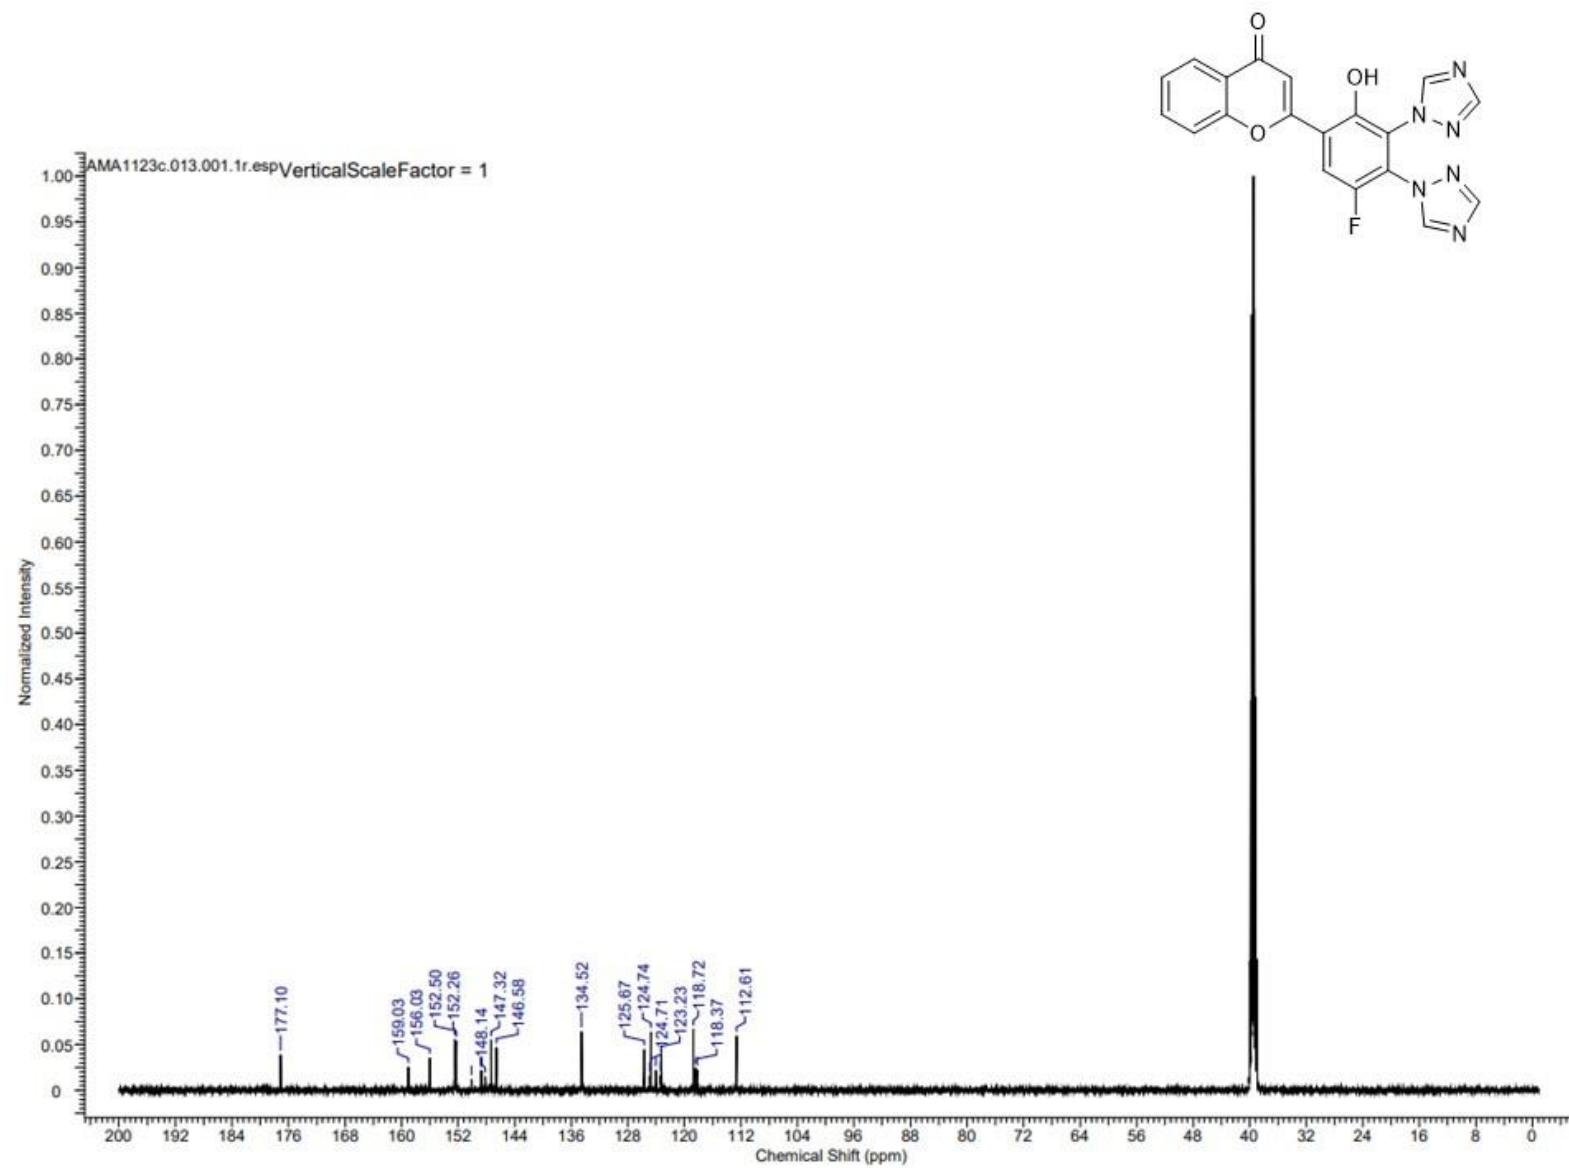



Figure S33.  $^{19}\text{F}$  NMR spectrum of compound 22

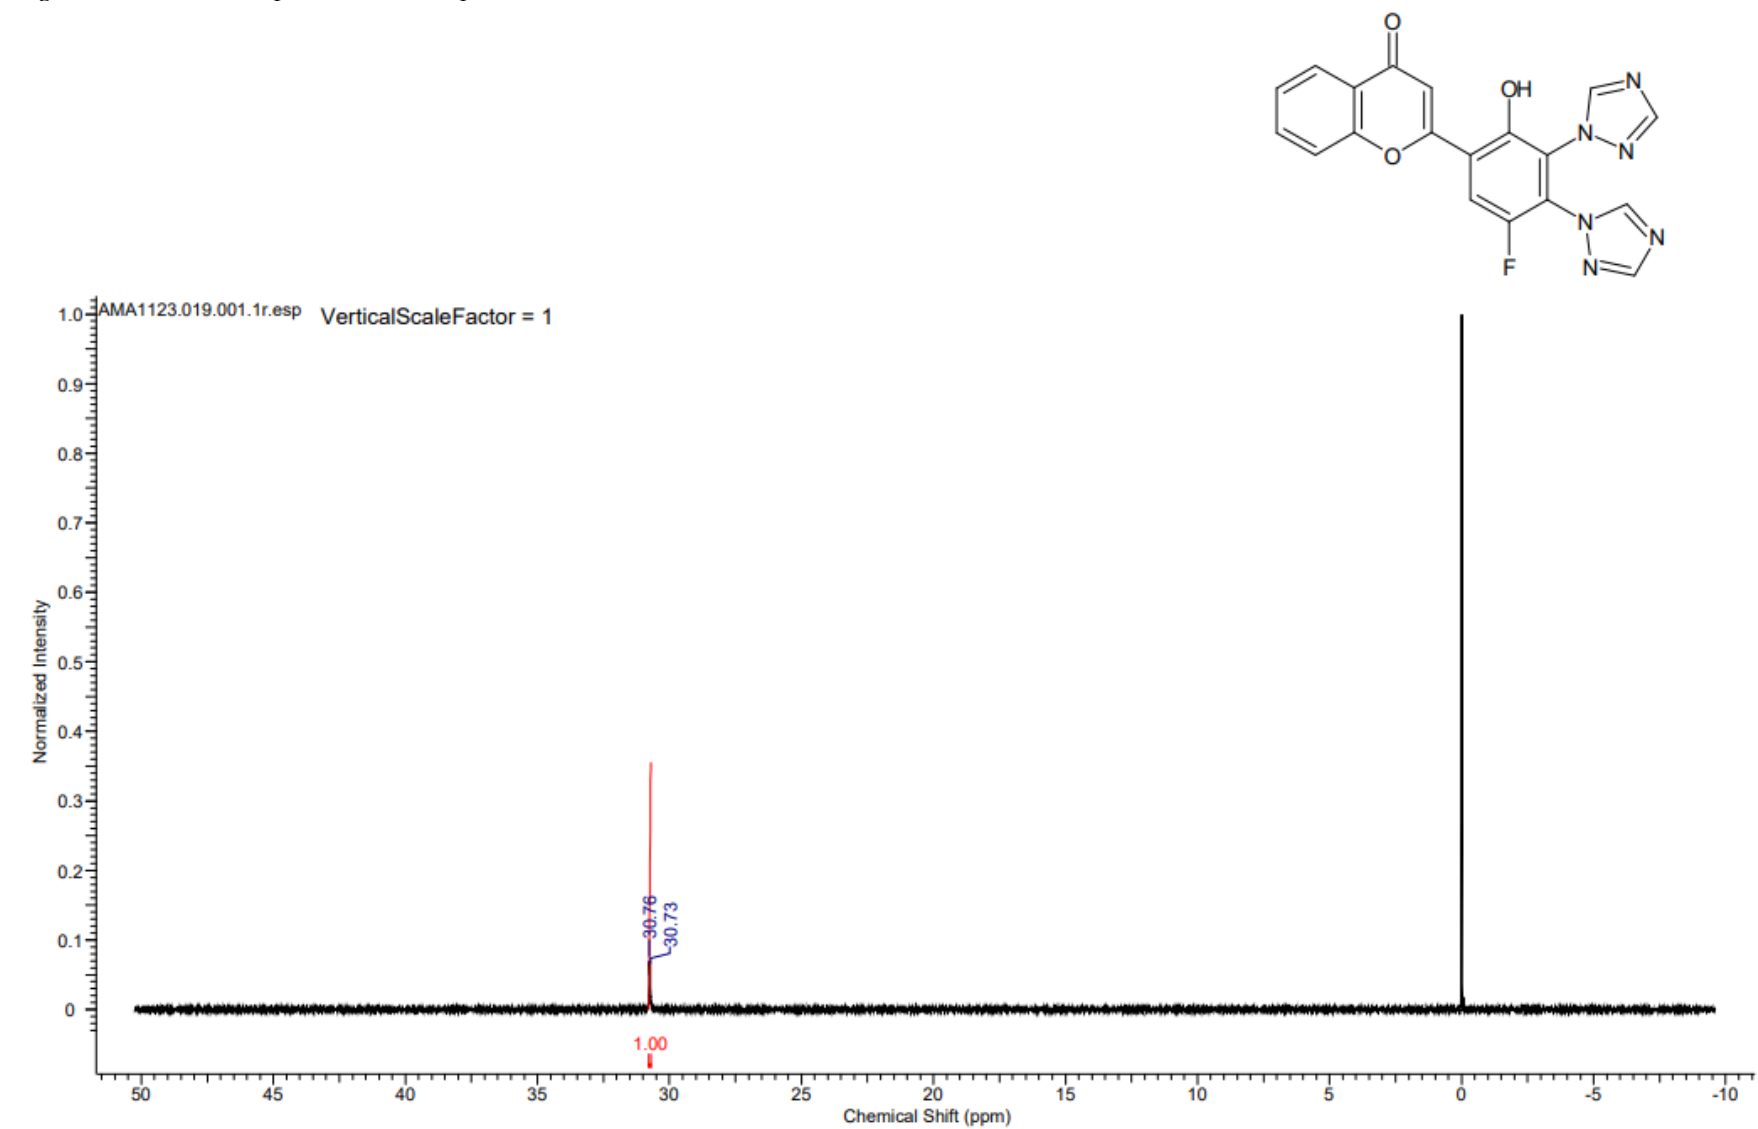

Figure S34. <sup>1</sup>H NMR spectrum of compound 23

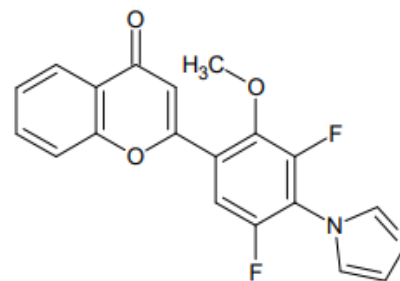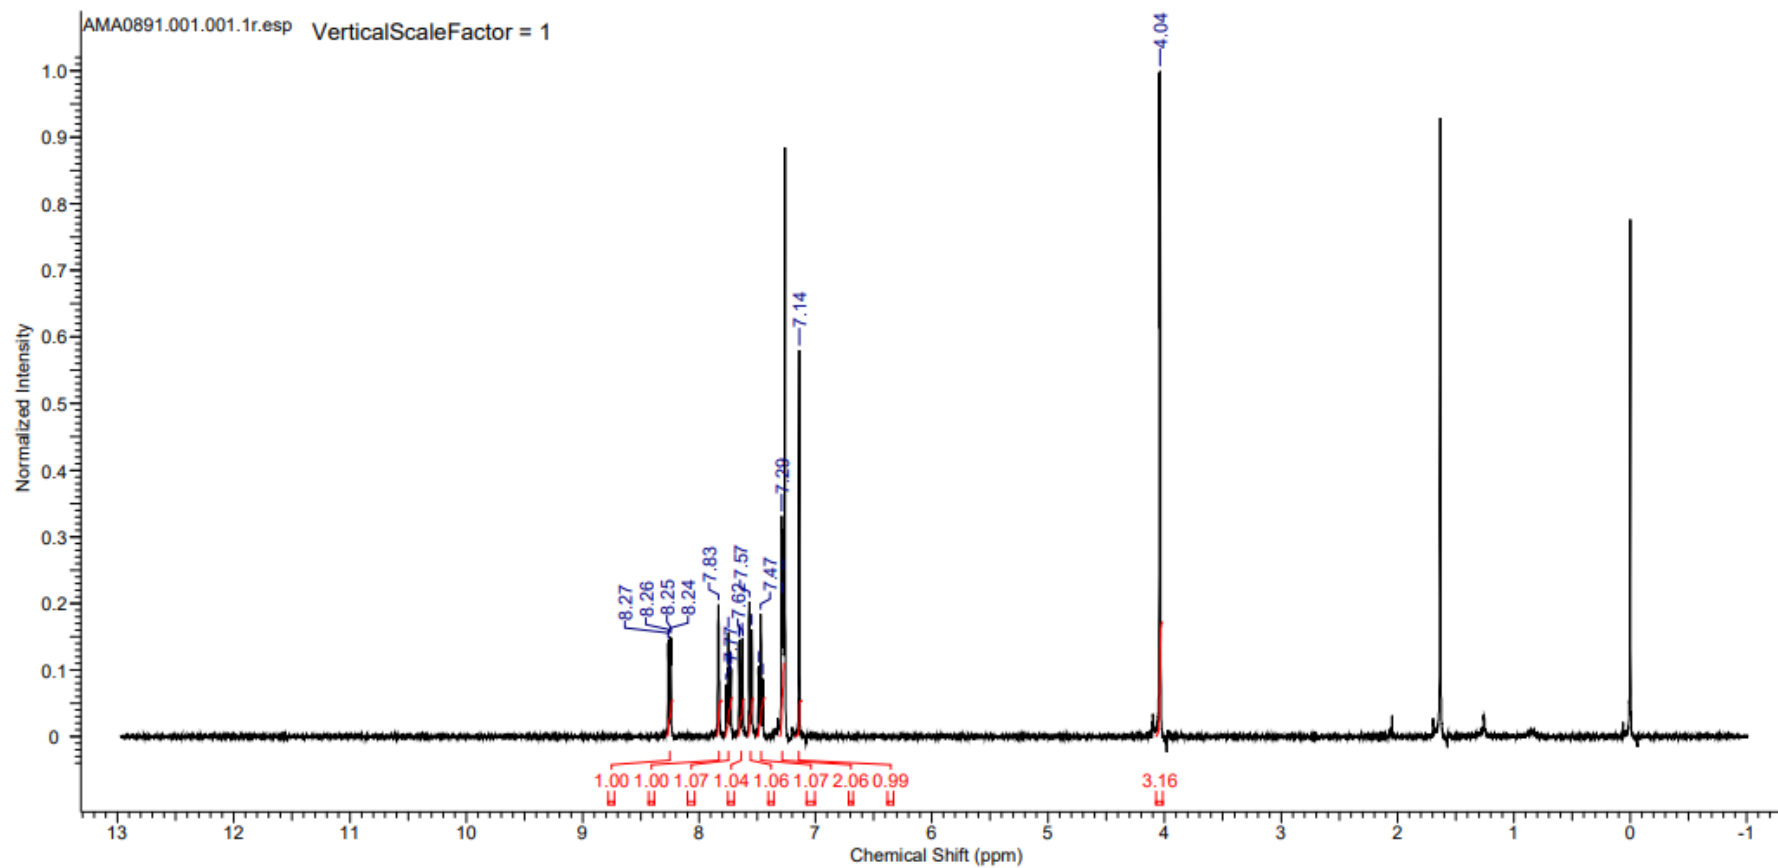

Figure S35.  $^{13}\text{C}$  NMR spectrum of compound 23

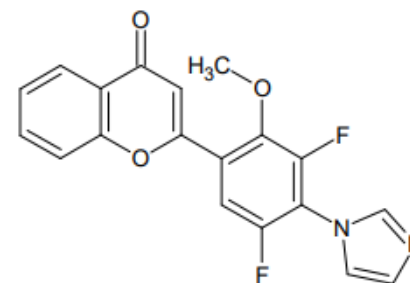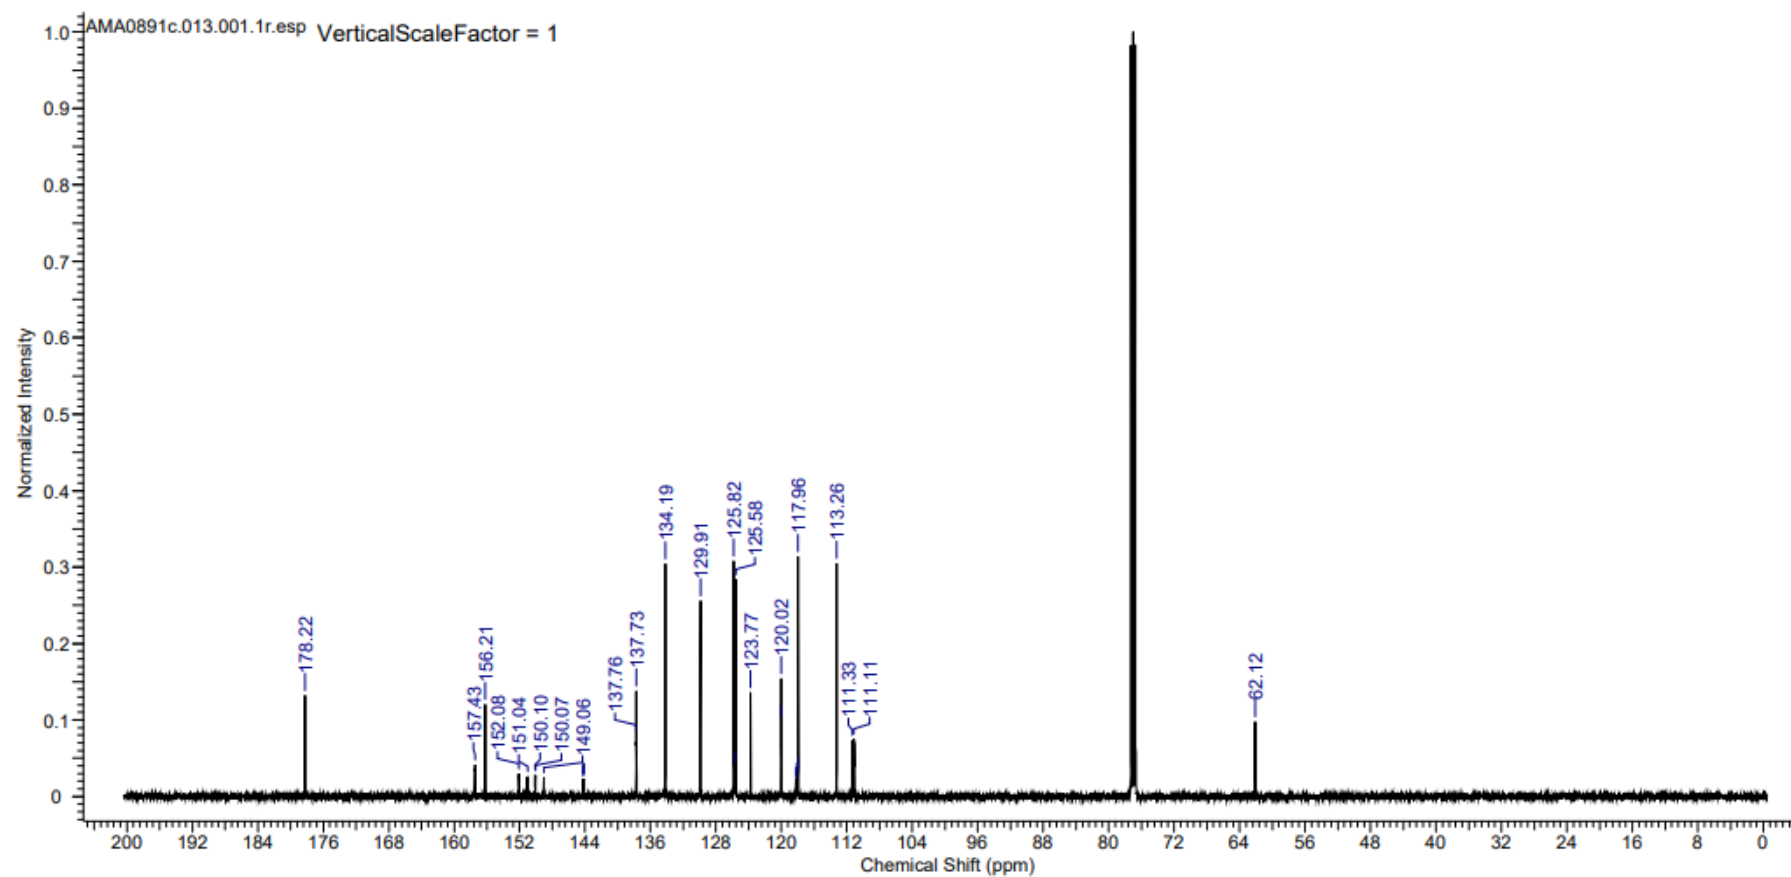

Figure S36.  $^{19}\text{F}$  NMR spectrum of compound 23

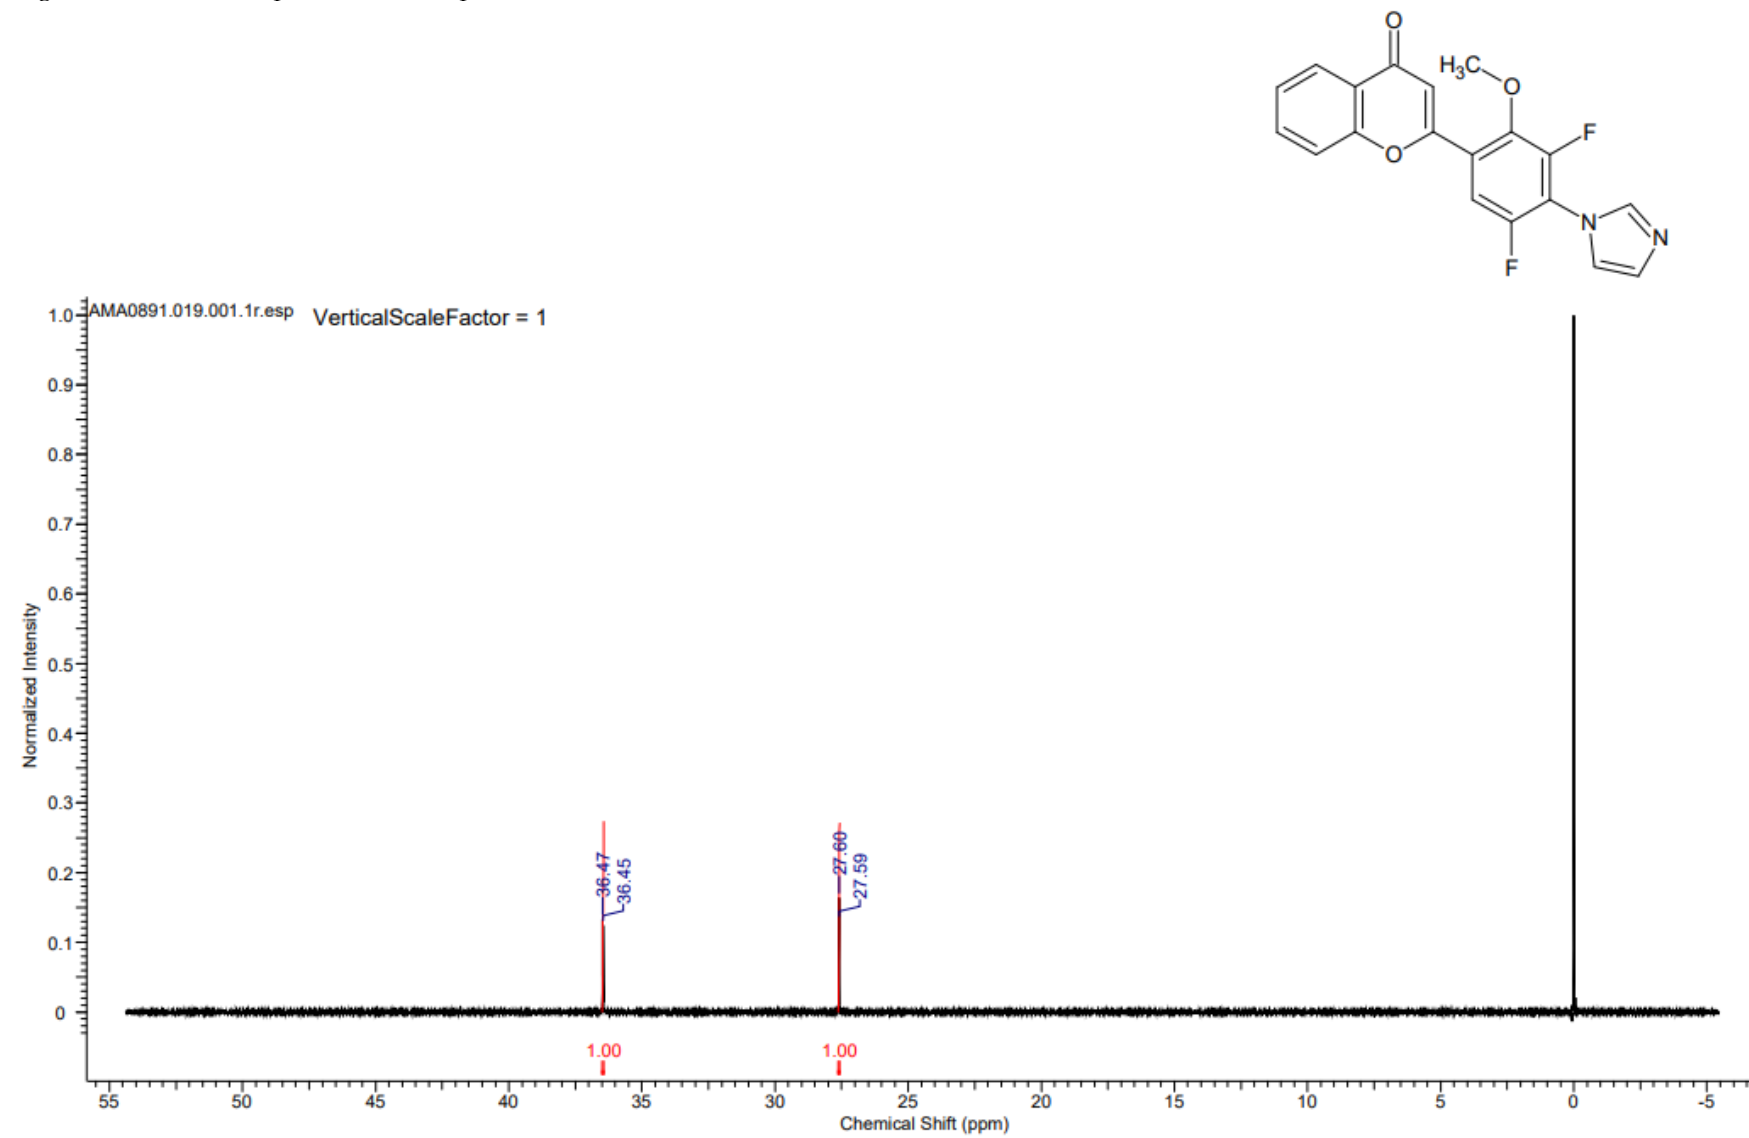

Figure S37. <sup>1</sup>H NMR spectrum of compound 26

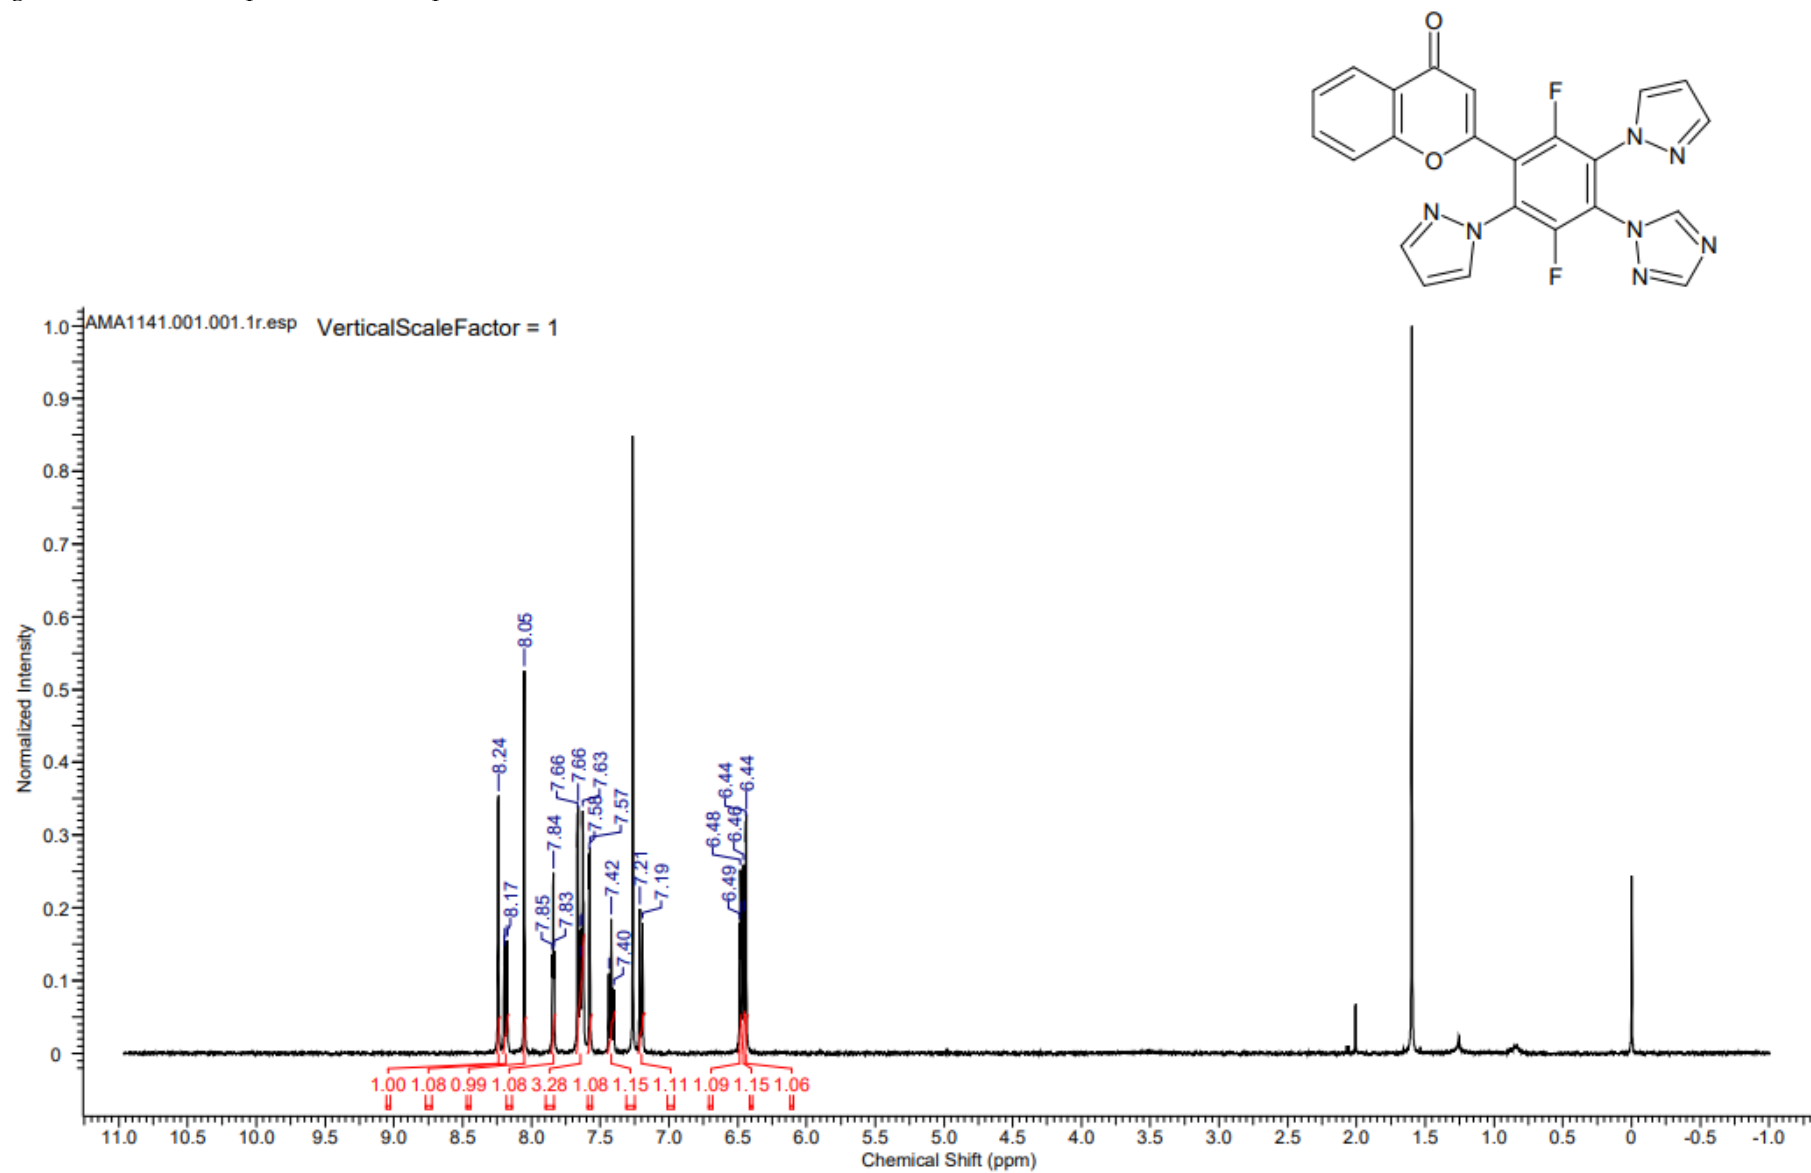

Figure S38.  $^{13}\text{C}$  NMR spectrum of compound 26

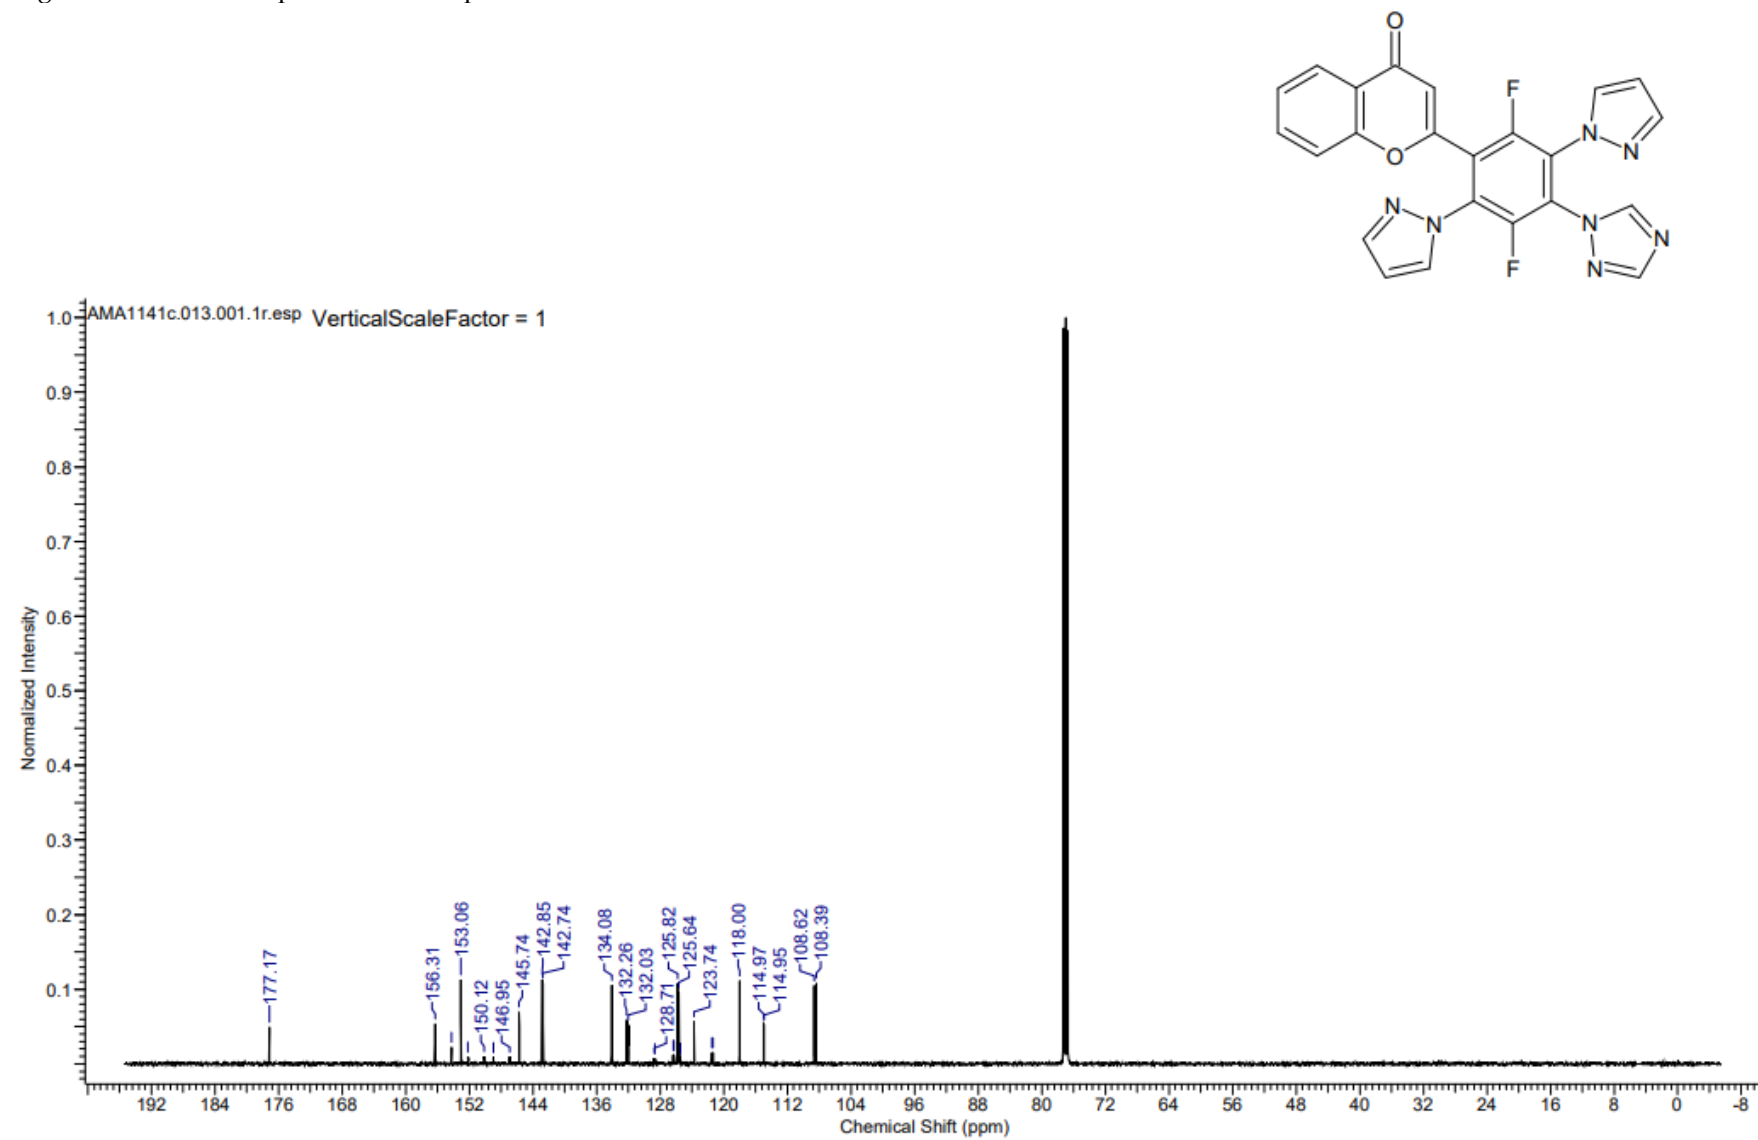

Figure S39.  $^{19}\text{F}$  NMR spectrum of compound 26

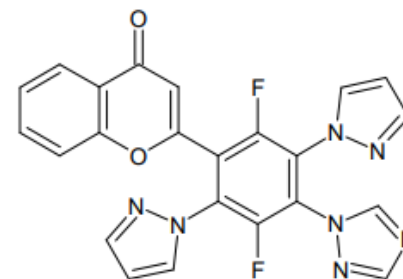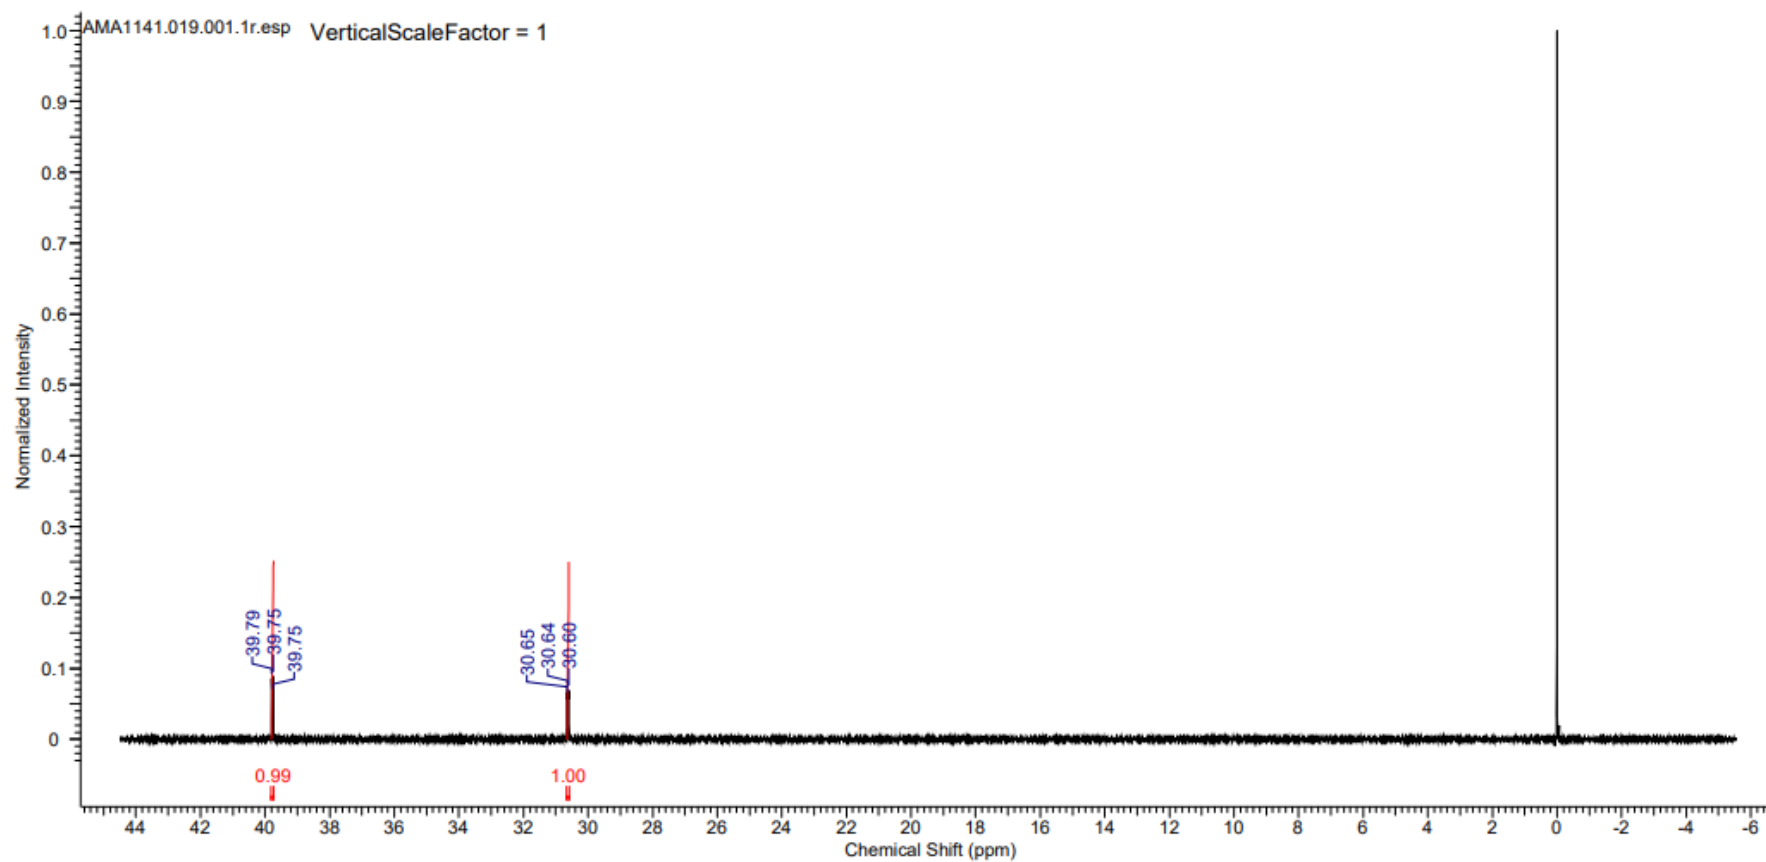

Figure S40. <sup>1</sup>H NMR spectrum of compound 27

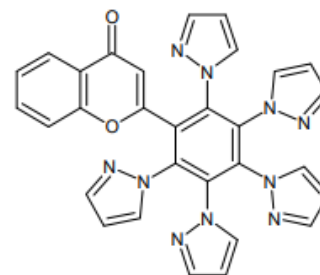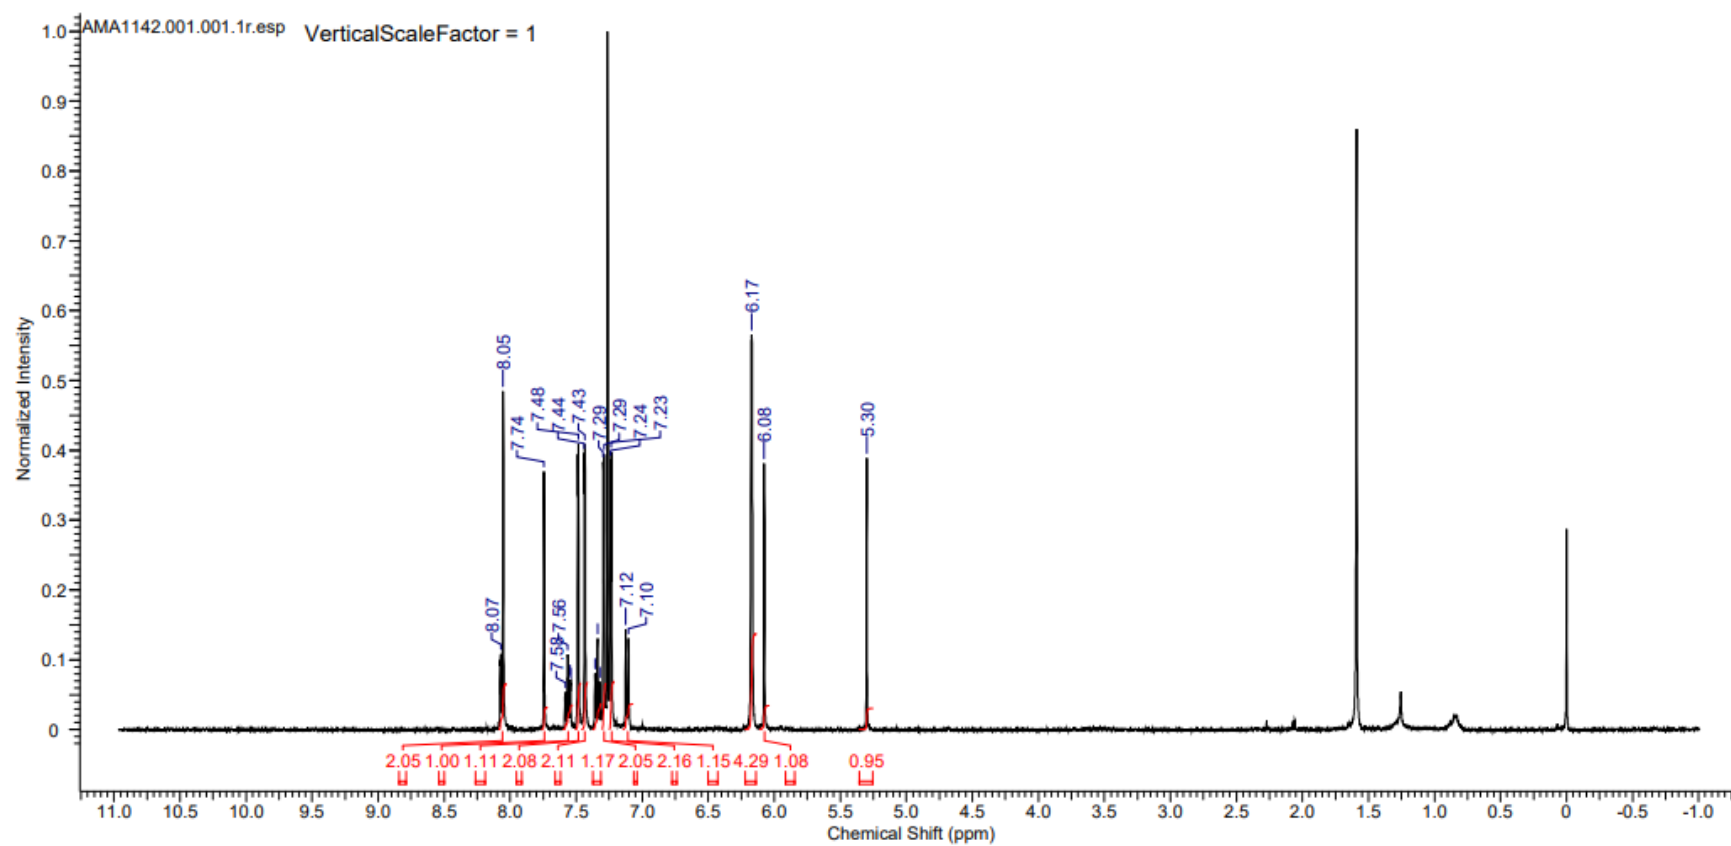



Figure S41.  $^{13}\text{C}$  NMR spectrum of compound 27

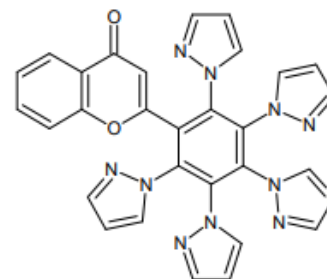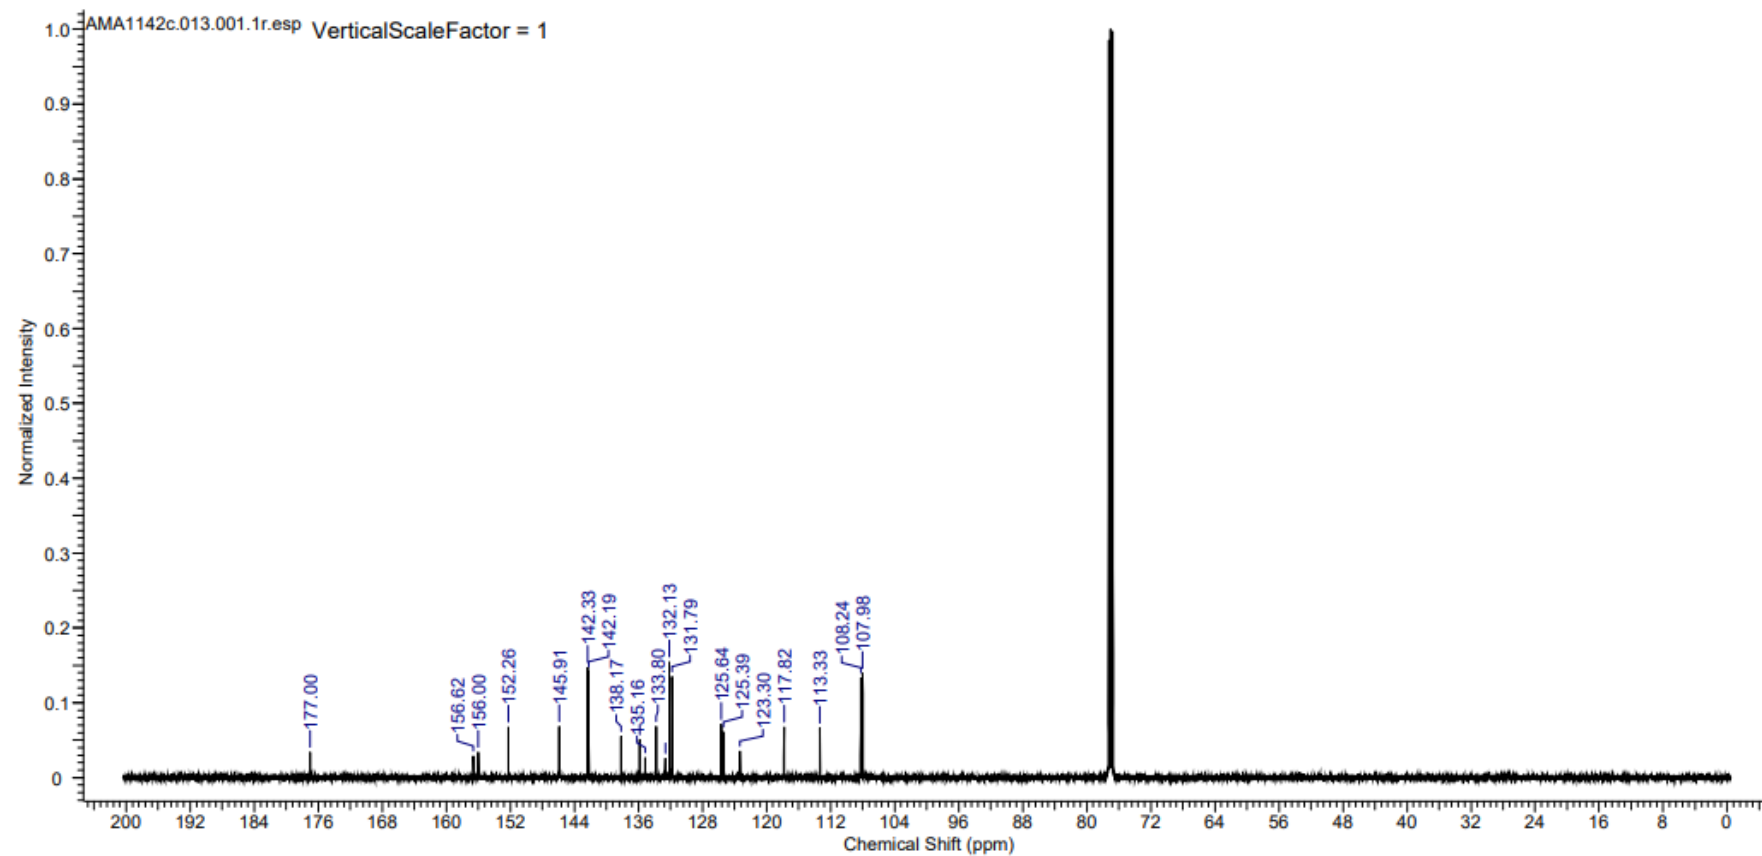

Figure S42. <sup>1</sup>H NMR spectrum of compound 28

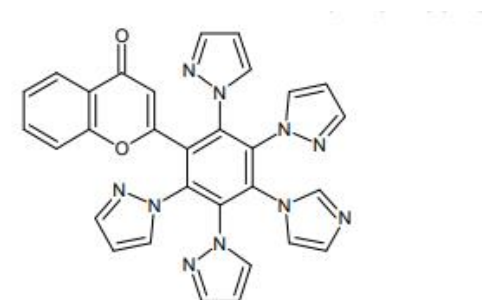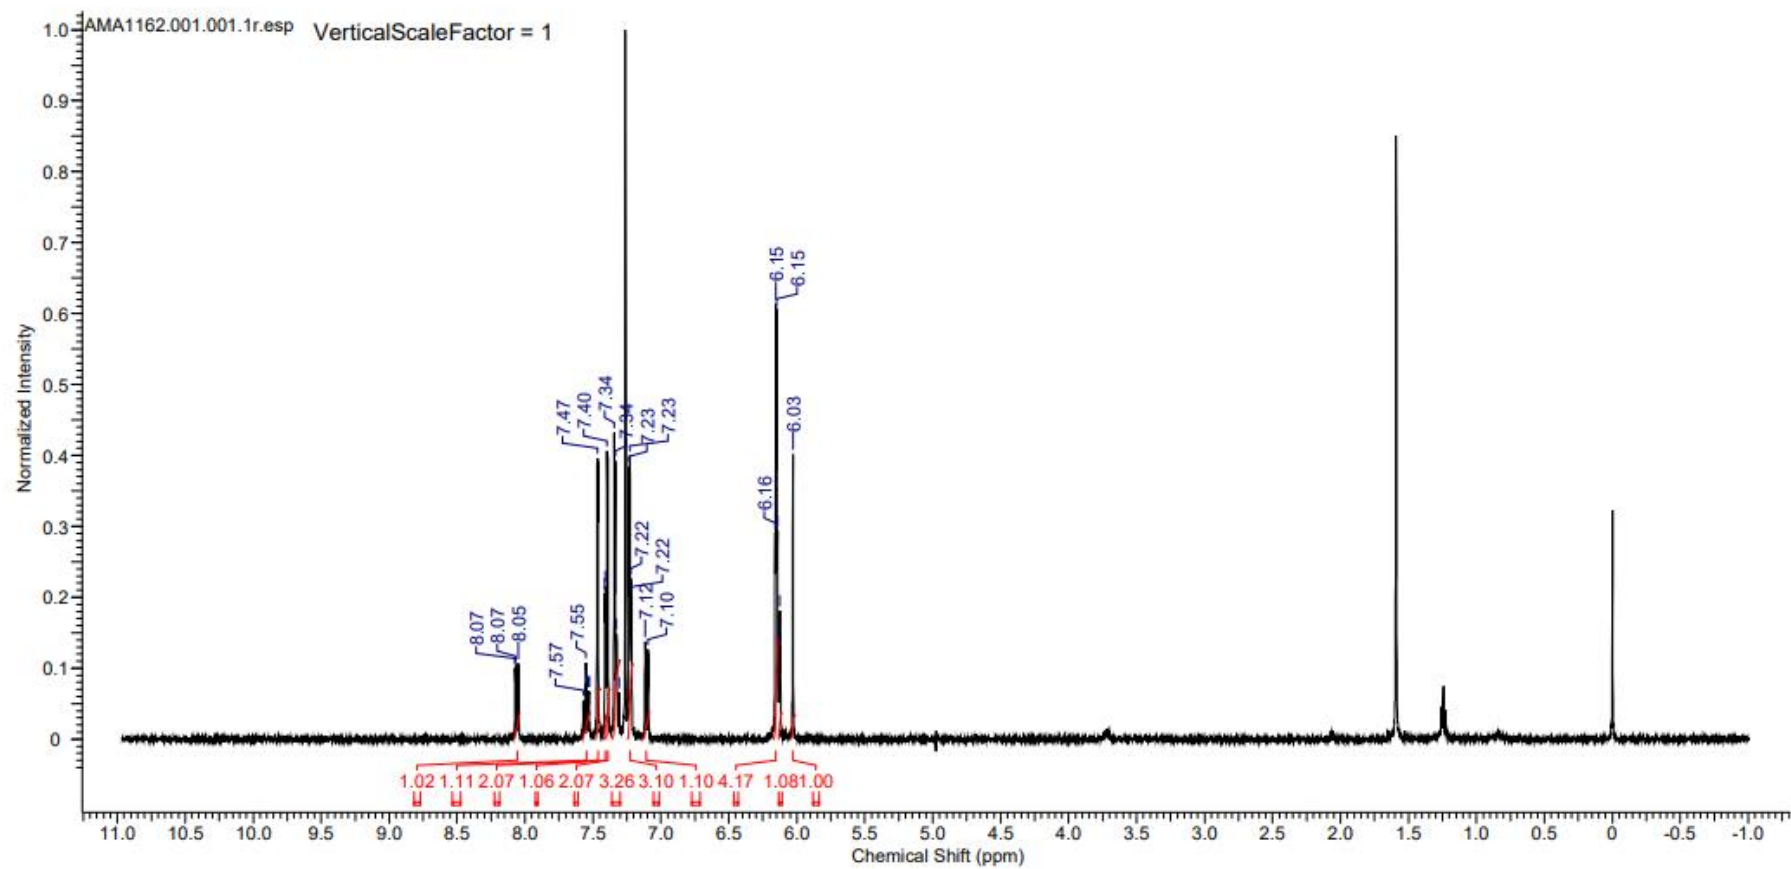

Figure S43.  $^{13}\text{C}$  NMR spectrum of compound 28

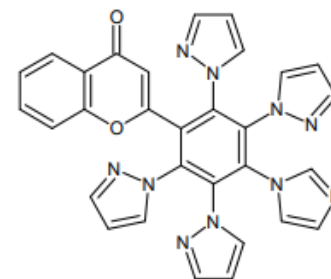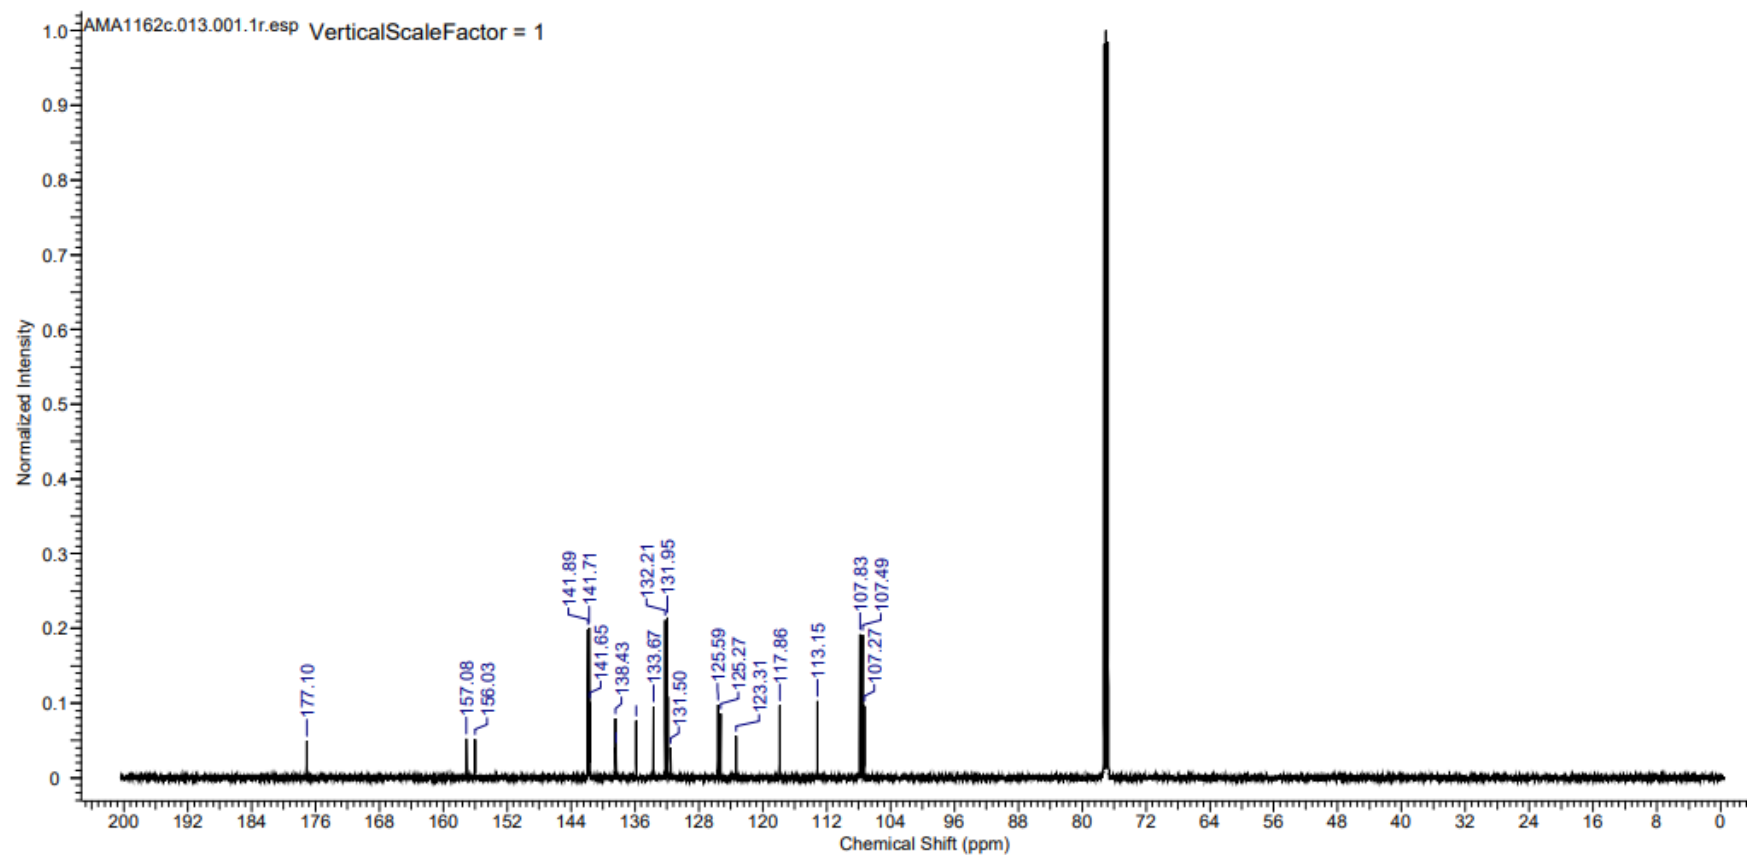

Figure S44. <sup>1</sup>H NMR spectrum of compound **29**

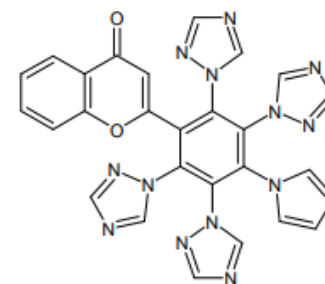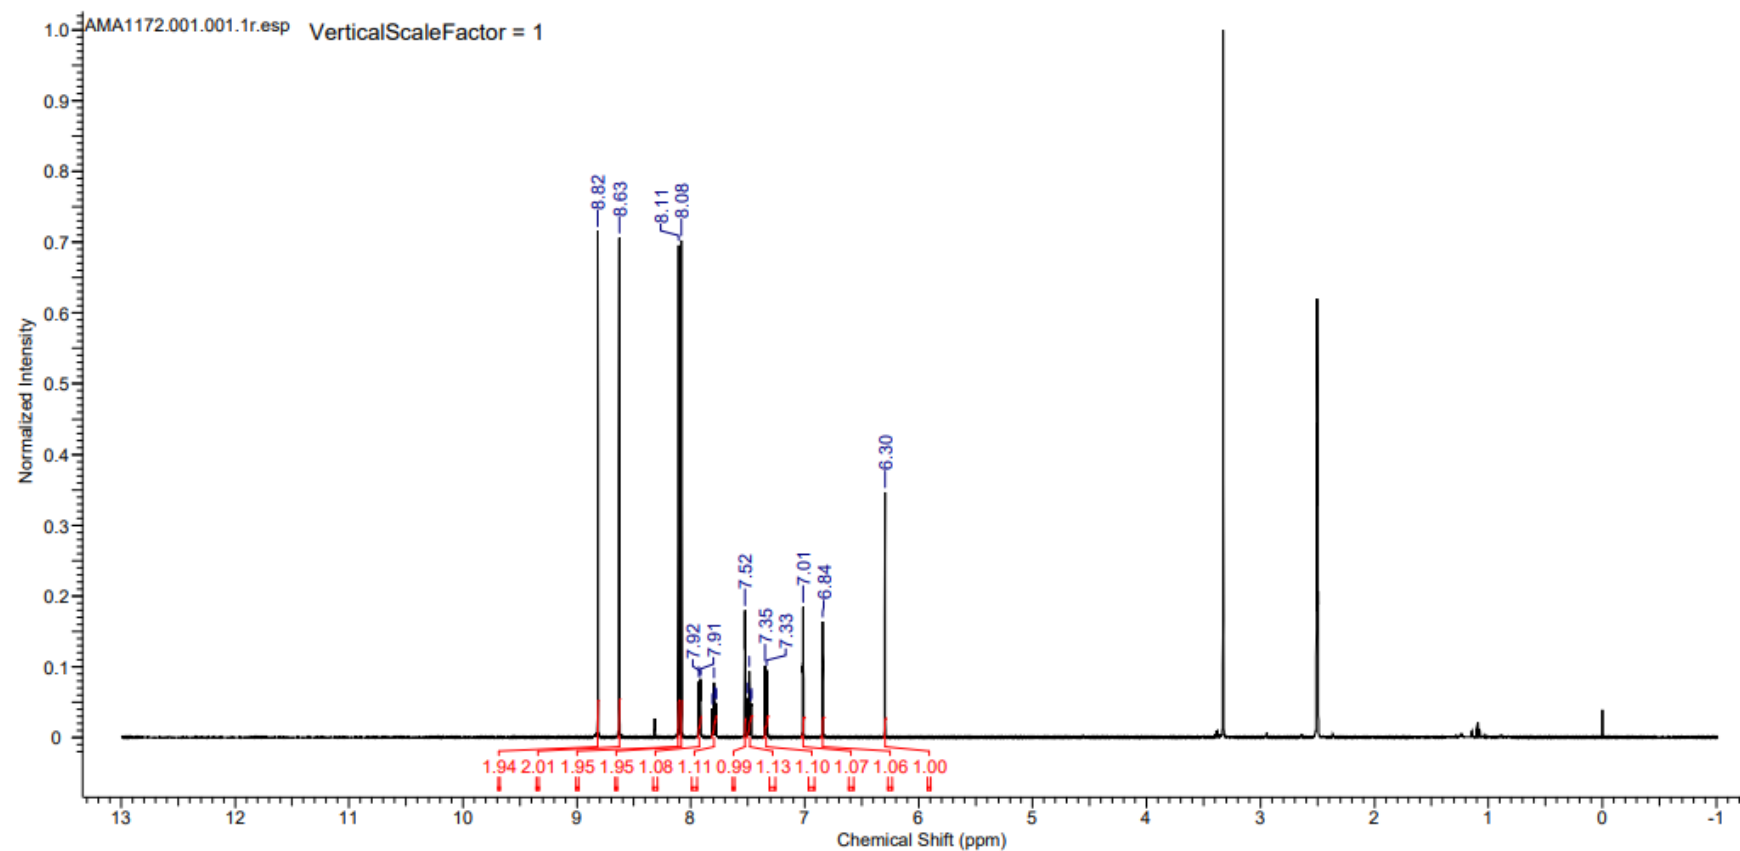

Figure S45.  $^{13}\text{C}$  NMR spectrum of compound **29**

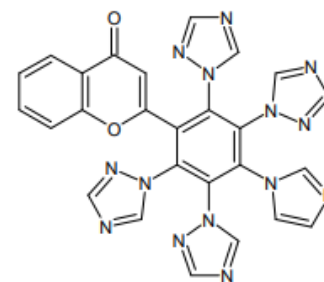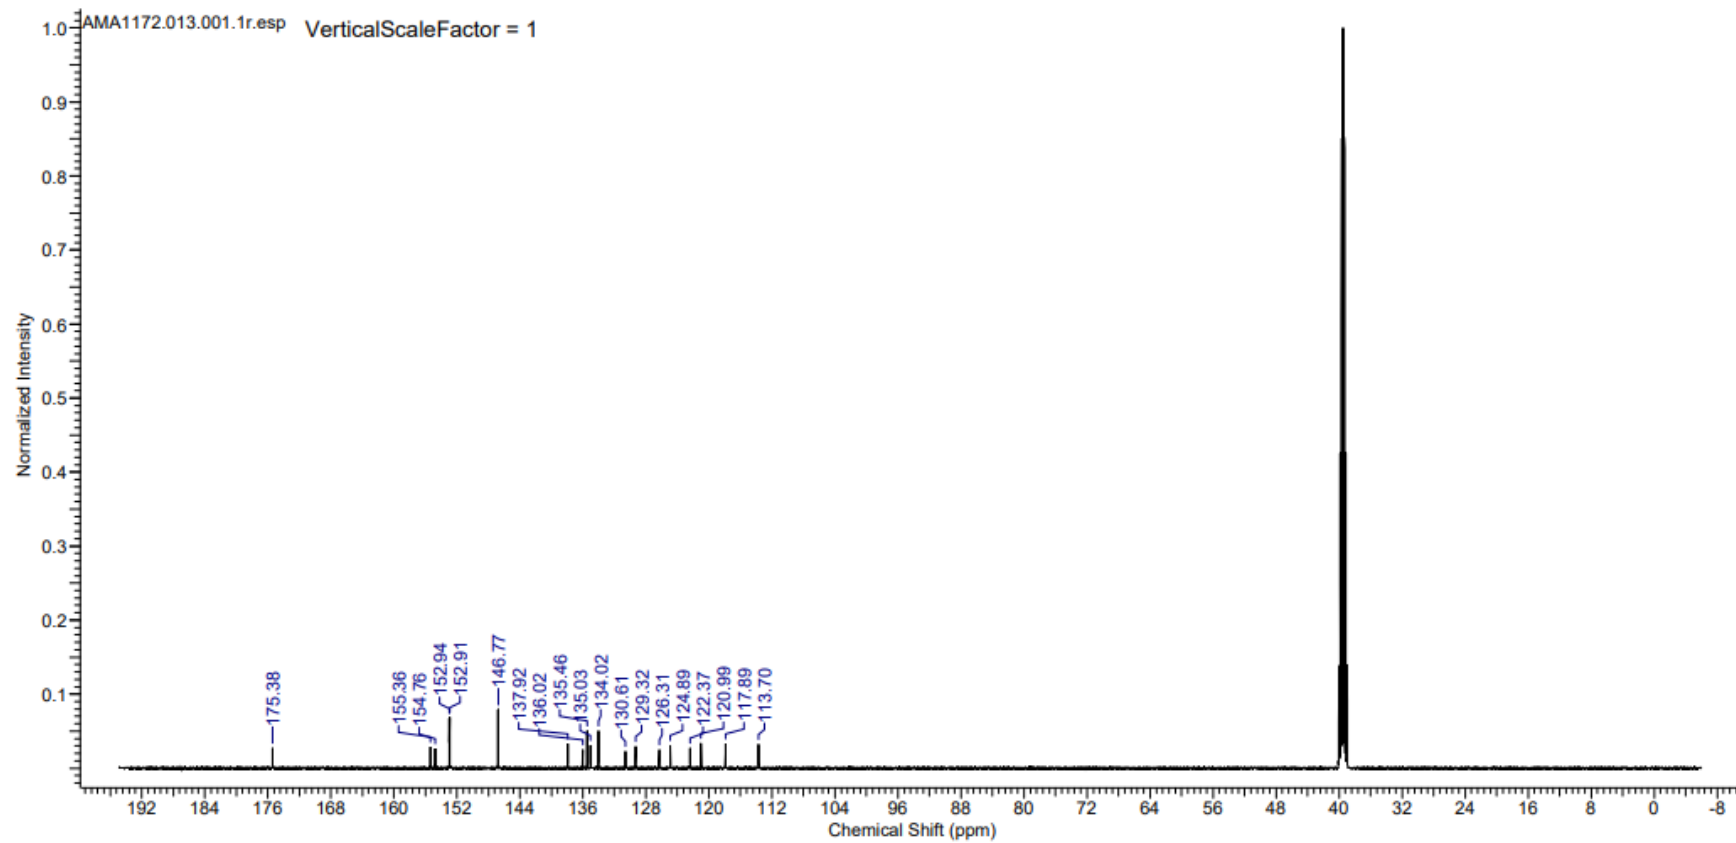

Figure S46. <sup>1</sup>H NMR spectrum of compound 31

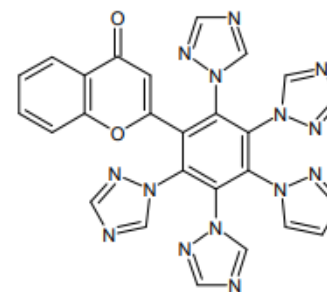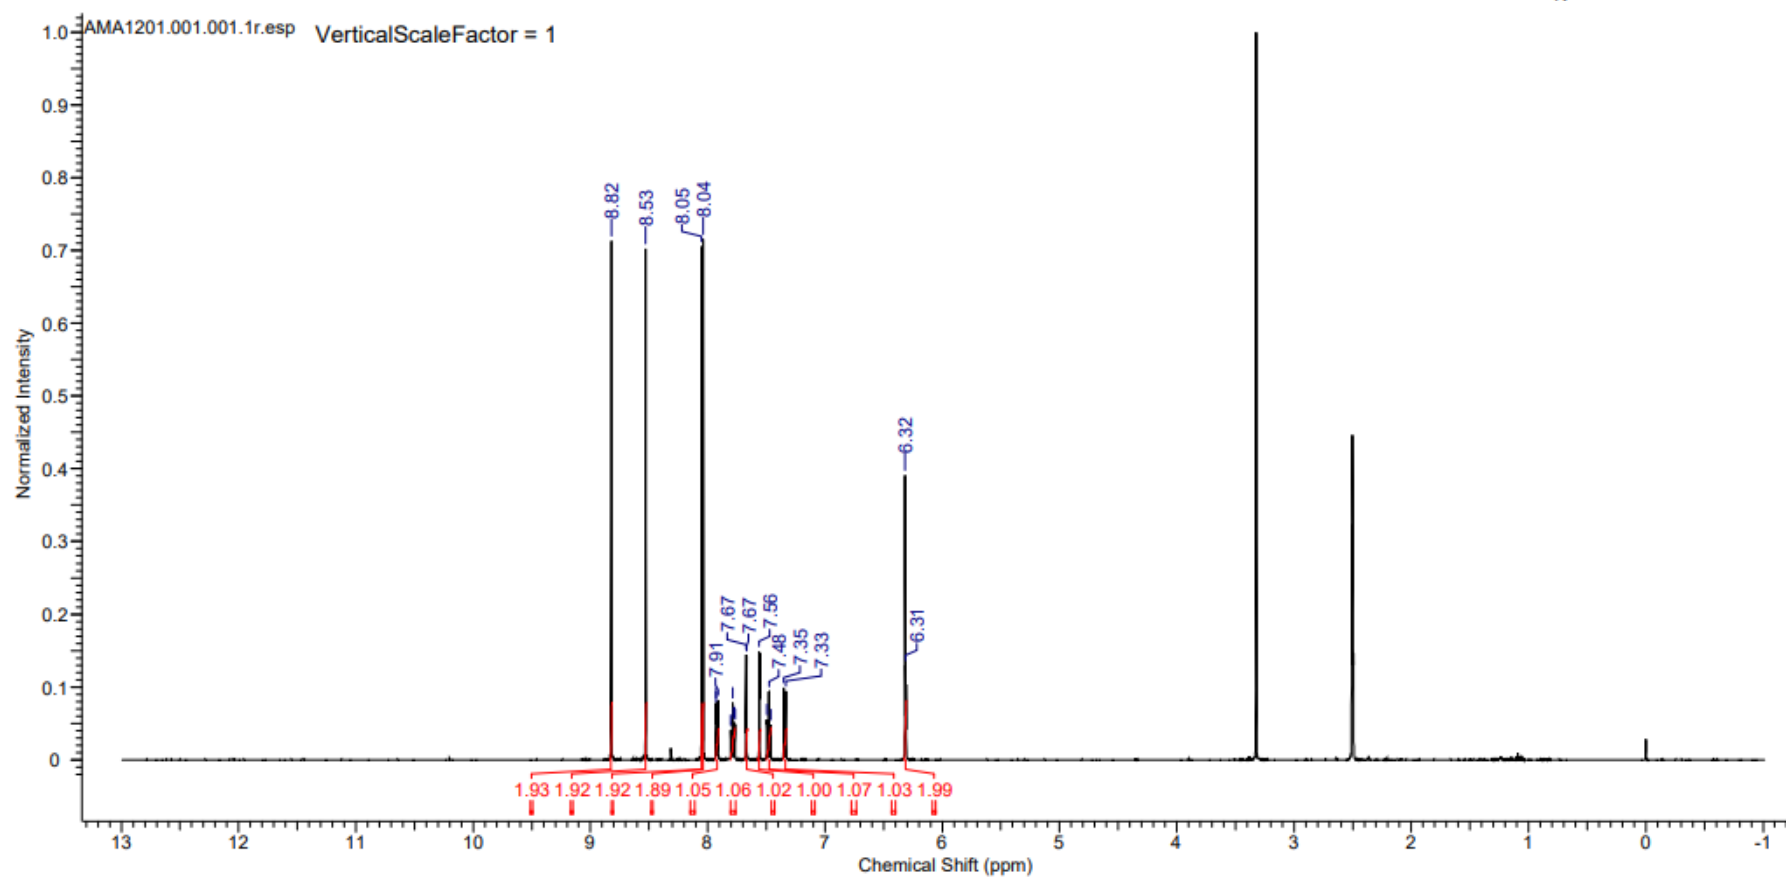

Figure S47.  $^{13}\text{C}$  NMR spectrum of compound **31**

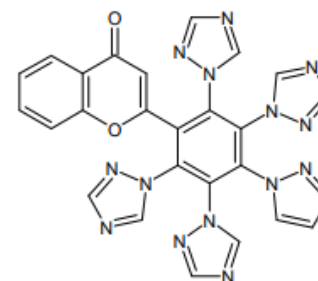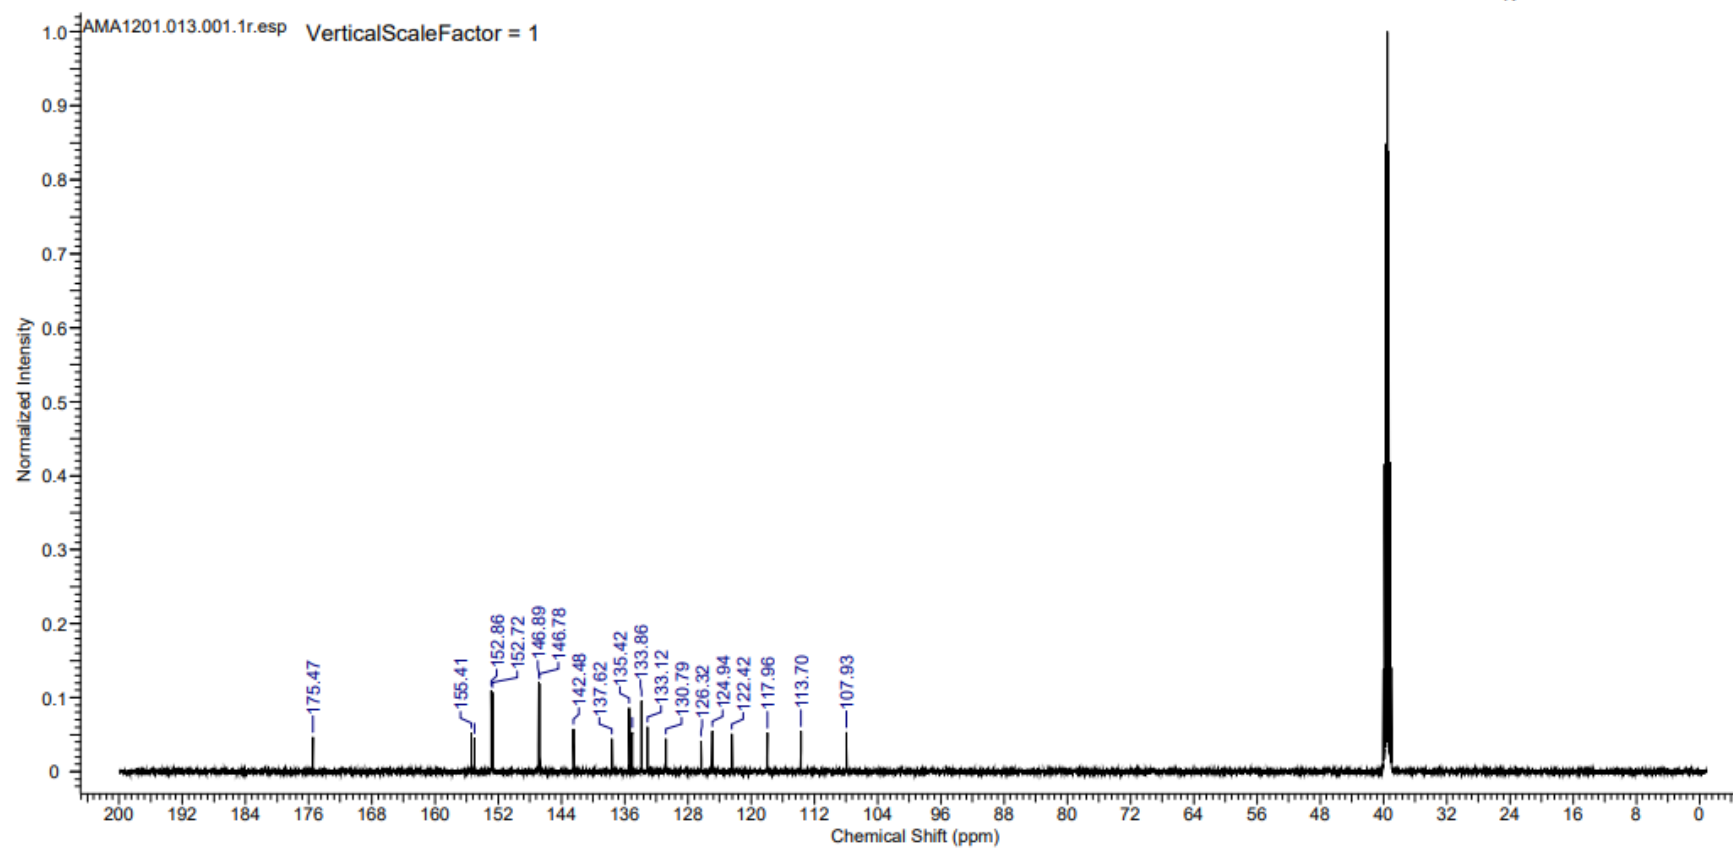

Supplement: s1 [file s1]
